# Supplementary material for: Identification of novel breast cancer susceptibility loci in meta-analyses conducted among Asian and European descendants
Source: PubMed Central journal article supplement (PMC7057957; doi:10.1038/s41467-020-15046-w), 2020-03-05
Supplement: 41467_2020_15046_MOESM1_ESM.pdf [file 41467_2020_15046_MOESM1_ESM.pdf]

**Supplementary Table 1. Studies contributing to the current analysis**

| <b>Study</b>                         | <b>Cases</b>   | <b>Controls</b> | <b>Sub-total</b> | <b>Genotyping platform</b>                            |
|--------------------------------------|----------------|-----------------|------------------|-------------------------------------------------------|
| <b>Asian ancestry (discovery)</b>    |                |                 |                  |                                                       |
| SBCGS                                |                |                 |                  |                                                       |
|                                      | 2,511          | 2,135           | 4,646            | Affymetrix GenomeWide Human SNP Array 6.0             |
|                                      | 1,563          | 2,396           | 3,959            | Illumina HumanExome-12v1_A Beadchip                   |
|                                      | 1,794          | 2,059           | 3,853            | Illumina Multi-Ethnic Genotyping Array                |
| HCES-Br                              | 274            | 273             | 547              | Illumina Multi-Ethnic Genotyping Array                |
| KPOP                                 | 963            | 921             | 1,884            | Illumina Multi-Ethnic Genotyping Array                |
| BBJ1                                 | 2,642          | 2,099           | 4,741            | Illumina OmniExpress BeadChip                         |
| SeBCS                                | 2,246          | 2,052           | 4,298            | Affymetrix Genome-Wide Human SNP Array 6.0            |
| BCAC iCOGS                           | 4,759          | 5,957           | 10,716           | Illumina iSelect Genotyping Array                     |
| BCAC Oncoarray                       | 7,454          | 6,883           | 14,337           | Illumina Infinium OncoArray-500K BeadChip             |
| <b>Sub-total</b>                     | <b>24,206</b>  | <b>24,775</b>   | <b>48,981</b>    |                                                       |
| <b>European ancestry (discovery)</b> |                |                 |                  |                                                       |
| BCAC GWAS                            | 14,910         | 17,588          | 32,498           | Illumina 370K/550K/610K/670K/1.2M, Affymetrix 5.0/6.0 |
| BCAC iCOGS                           | 46,785         | 42,892          | 89,677           | Illumina iSelect Genotyping Array                     |
| BCAC Oncoarray                       | 61,282         | 45,494          | 106,776          | Illumina Infinium OncoArray-500K BeadChip             |
| <b>Sub-total</b>                     | <b>122,977</b> | <b>105,974</b>  | <b>228,951</b>   |                                                       |
| <b>Total (discovery)</b>             | <b>147,183</b> | <b>130,749</b>  | <b>277,932</b>   |                                                       |
| <b>Asian ancestry (validation)</b>   |                |                 |                  |                                                       |
| HCES1                                | 3,387          | 3,172           | 6,559            | iPLEX Sequenom MassArray                              |
| HCES2                                | 2,187          | 621             | 2,808            | iPLEX Sequenom MassArray                              |
| Hong Kong                            | 476            | 278             | 754              | iPLEX Sequenom MassArray                              |
| KNCC                                 | 505            | 503             | 1,008            | iPLEX Sequenom MassArray                              |
| KOHBRA                               | 1,397          | 3,209           | 4,606            | iPLEX Sequenom MassArray                              |
| SeBCS                                | 775            | 1,103           | 1,878            | iPLEX Sequenom MassArray                              |
| NGOBCS                               | 400            | 401             | 801              | iPLEX Sequenom MassArray                              |
| HERPACC-II                           | 644            | 644             | 1,288            | iPLEX Sequenom MassArray                              |
| TWBCS                                | 1,058          | 1,065           | 2,123            | iPLEX Sequenom MassArray                              |
| MYBRCA & SGBCC                       | 5,958          | 5,684           | 11,642           | Illumina Infinium OncoArray-500K BeadChip             |
| <b>Sub-total</b>                     | <b>16,787</b>  | <b>16,680</b>   | <b>33,467</b>    |                                                       |
| <b>Total (discovery+replication)</b> | <b>163,970</b> | <b>147,429</b>  | <b>311,399</b>   |                                                       |

**Supplementary Table 2. Pleiotropy of primary hits in the GWAS Catalog**

| SNP        | SNP in LD  | r <sup>2</sup>               | Effect allele     | Other allele | Disease/trait                         | OR/Beta   | P                                         | Study                                                                                                                                                                                                                                                                                                                                                                          | Journal               |
|------------|------------|------------------------------|-------------------|--------------|---------------------------------------|-----------|-------------------------------------------|--------------------------------------------------------------------------------------------------------------------------------------------------------------------------------------------------------------------------------------------------------------------------------------------------------------------------------------------------------------------------------|-----------------------|
| rs3790585  | rs1707322  | 0.58 (East Asian); 0.30 (EA) | G                 | A            | Body mass index                       | 0.02      | 2×10 <sup>-8</sup>                        | Genome-wide physical activity interactions in adiposity - A meta-analysis of 200,452 adults.                                                                                                                                                                                                                                                                                   | PLoS Genet            |
|            | rs2275426  | 0.52 (East Asian); 0.12 (EA) | A                 | G            | Body mass index                       | 0.02      | 8×10 <sup>-10</sup>                       | The Influence of Age and Sex on Genetic Associations with Adult Body Size and Shape: A Large-Scale Genome-Wide Interaction Study.                                                                                                                                                                                                                                              | PLoS Genet            |
|            | rs1538970  | 0.57 (East Asian); 0.43 (EA) | A                 | G            | Platelet count                        | 0.04      | 4×10 <sup>-19</sup>                       | The Allelic Landscape of Human Blood Cell Trait Variation and Links to Common Complex Disease.                                                                                                                                                                                                                                                                                 | Cell                  |
|            | rs2230657  | 0.69 (East Asian); 0.15 (EA) | A                 | G            | Hemoglobin concentration              | 0.03      | 3×10 <sup>-13</sup>                       | The Allelic Landscape of Human Blood Cell Trait Variation and Links to Common Complex Disease.                                                                                                                                                                                                                                                                                 | Cell                  |
|            | rs2991971  | 0.79 (East Asian); 0.13 (EA) | G                 | C            | High light scatter reticulocyte count | 0.03      | 4×10 <sup>-12</sup>                       | The Allelic Landscape of Human Blood Cell Trait Variation and Links to Common Complex Disease.                                                                                                                                                                                                                                                                                 | Cell                  |
|            | rs61784824 | 0.76 (East Asian); 0.36 (EA) | Not Reported (NR) | NR           | Platelet count                        | 0.03      | 2×10 <sup>-10</sup>                       | Genetic analysis of quantitative traits in the Japanese population links cell types to complex human diseases.                                                                                                                                                                                                                                                                 | Nat Genet             |
|            | rs7538978  | 0.58 (East Asian); 0.31 (EA) |                   |              | Sodium levels                         | 0.03      | 5×10 <sup>-12</sup>                       | Genetic analysis of quantitative traits in the Japanese population links cell types to complex human diseases.                                                                                                                                                                                                                                                                 | Nat Genet             |
| rs2758598  | rs2072499  | 0.99 (East Asian); 0.93 (EA) | G                 | A            | Testicular germ cell tumor            | 1.18-1.20 | 3×10 <sup>-8</sup> - 2×10 <sup>-10</sup>  | Meta-analysis of five genome-wide association studies identifies multiple new loci associated with testicular germ cell tumor. Identification of 19 new risk loci and potential regulatory mechanisms influencing susceptibility to testicular germ cell tumor. Identification of nine new susceptibility loci for testicular cancer, including variants near DAZL and PRDM14. | Nat Genet             |
|            | rs2984613  | 0.33 (East Asian); 0.91 (EA) | C                 | T            | White matter hyperintensity burden    | NR        | 2×10 <sup>-8</sup>                        | Multiethnic genome-wide association study of cerebral white matter hyperintensities on MRI.                                                                                                                                                                                                                                                                                    | Circ Cardiovasc Genet |
|            | rs2984613  | 0.33 (East Asian); 0.91 (EA) | C                 | T            | Intracerebral hemorrhage              | 1.33      | 2×10 <sup>-10</sup>                       | Meta-analysis of genome-wide association studies identifies 1q22 as a susceptibility locus for intracerebral hemorrhage.                                                                                                                                                                                                                                                       | Am J Hum Genet        |
| rs6756513  | -          | -                            | A                 | G            | Platelet count                        | 0.03      | 7×10 <sup>-10</sup>                       | The Allelic Landscape of Human Blood Cell Trait Variation and Links to Common Complex Disease.                                                                                                                                                                                                                                                                                 | Cell                  |
|            | rs3771529  | 0.40 (East Asian); 0.56 (EA) | A                 | G            | Mean platelet volume                  | 0.04      | 9×10 <sup>-17</sup>                       | The Allelic Landscape of Human Blood Cell Trait Variation and Links to Common Complex Disease.                                                                                                                                                                                                                                                                                 | Cell                  |
|            | rs11686934 | 0.25 (East Asian); 0.40 (EA) | G                 | A            | High light scatter reticulocyte count | 0.02      | 7×10 <sup>-9</sup>                        | The Allelic Landscape of Human Blood Cell Trait Variation and Links to Common Complex Disease.                                                                                                                                                                                                                                                                                 | Cell                  |
| rs2901157  | rs12570134 | 0.65 (East Asian); 0.63 (EA) | T                 | G            | Double-edged eyelids                  | 1.41      | 8×10 <sup>-15</sup>                       | Genome-wide association study in Japanese females identifies fifteen novel skin-related trait associations.                                                                                                                                                                                                                                                                    | Sci Rep               |
| rs855596   | rs703556   | 0.43 (East Asian); 0.94 (EA) | A                 | G            | Mammographic density (dense area)     | 0.41      | 4×10 <sup>-10</sup>                       | Genome-wide association study identifies multiple loci associated with both mammographic density and breast cancer risk.                                                                                                                                                                                                                                                       | Nat Commun            |
| rs8027365  | rs7184046  | 0.97 (East Asian); 0.90 (EA) | C                 | G            | Height                                | 0.03      | 2×10 <sup>-10</sup>                       | Meta-analysis of genome-wide association studies of adult height in East Asians identifies 17 novel loci.                                                                                                                                                                                                                                                                      | Hum Mol Genet         |
| rs34331122 | rs1978060  | 0.61 (East Asian); 0.40 (EA) | G                 | A            | Childhood ear infection, Myringotomy  | 1.09-1.17 | 3×10 <sup>-10</sup> - 1×10 <sup>-19</sup> | Genome-wide association and HLA region fine-mapping studies identify susceptibility loci for multiple common infections.                                                                                                                                                                                                                                                       | Nat Commun            |
|            |            |                              | NR                | NR           | Childhood ear infection               | 1.09      | 1×10 <sup>-19</sup>                       | Detection and interpretation of shared genetic influences on 42 human traits.                                                                                                                                                                                                                                                                                                  | Nat Genet             |
|            | rs2238776  | 0.43 (East Asian); <0.2 (EA) | G                 | A            | Prostate cancer                       | 1.08      | 2×10 <sup>-8</sup>                        | A meta-analysis of 87,040 individuals identifies 23 new susceptibility loci for prostate cancer.                                                                                                                                                                                                                                                                               | Nat Genet             |
|            |            |                              | A                 | G            | Interleukin-10 levels                 | -0.06     | 4×10 <sup>-9</sup>                        | Genome-wide associated loci influencing interleukin (IL)-10, IL-1Ra, and IL-6 levels in African Americans.                                                                                                                                                                                                                                                                     | Immunogenetics        |
|            | rs41298830 | 0.43 (East Asian); <0.2 (EA) | A                 | C            | Tonsillectomy                         | 1.06      | 5×10 <sup>-8</sup>                        | Genome-wide association and HLA region fine-mapping studies identify susceptibility loci for multiple common infections.                                                                                                                                                                                                                                                       | Nat Commun            |
|            |            |                              | NR                | NR           |                                       |           |                                           | Detection and interpretation of shared genetic influences on 42 human traits.                                                                                                                                                                                                                                                                                                  | Nat Genet             |

Supplementary Table 3. Results of replication study 28 newly-associated risk variants using additional Asian samples

| SNP        | Sequenom replication |             |         |           |              |         |            |                  |                       | MYBRCA & SGBCC |      |           |              |         |            | Meta-analysis |                  |                       |                  | Consistent with main results |       |           |
|------------|----------------------|-------------|---------|-----------|--------------|---------|------------|------------------|-----------------------|----------------|------|-----------|--------------|---------|------------|---------------|------------------|-----------------------|------------------|------------------------------|-------|-----------|
|            | Test                 | Index       | EAS, r2 | MAF, case | MAF, control | N, case | N, control | OR               | P                     | SNP            | Test | MAF, case | MAF, control | N, case | N, control | Info score    | OR               | P                     | OR               |                              | P     | $P_{het}$ |
| rs4442172  | A                    | rs142360995 | 1       | 0.069     | 0.067        | 9845    | 9612       | 1.03 (0.90-1.17) | 0.683                 | rs142360995    | A    | 0.113     | 0.124        | 5958    | 5684       | 0.995         | 1.03 (0.94-1.11) | 0.550                 | 1.03 (0.96-1.10) | 0.469                        | 0.981 | Yes       |
| rs2901157  | G                    | NA          | NA      | 0.323     | 0.320        | 10108   | 9558       | 1.00 (0.94-1.05) | 0.931                 | rs2901157      | G    | 0.193     | 0.186        | 5958    | 5684       | 1             | 0.96 (0.90-1.03) | 0.271                 | 0.98 (0.94-1.03) | 0.442                        | 0.428 | Yes       |
| rs75004998 | G                    | NA          | NA      | 0.442     | 0.420        | 9868    | 9731       | 1.08 (1.04-1.13) | $2.95 \times 10^{-4}$ | rs75004998     | G    | 0.564     | 0.576        | 5958    | 5684       | 0.998         | 1.02 (0.97-1.07) | 0.513                 | 1.06 (1.02-1.09) | $1.27 \times 10^{-3}$        | 0.076 | Yes       |
| rs73006998 | A                    | NA          | NA      | 0.338     | 0.362        | 10311   | 10271      | 0.90 (0.86-0.94) | $8.98 \times 10^{-7}$ | rs73006998     | A    | 0.278     | 0.277        | 5958    | 5684       | 0.993         | 0.92 (0.86-0.98) | $4.50 \times 10^{-3}$ | 0.90 (0.87-0.94) | $1.66 \times 10^{-8}$        | 0.557 | Yes       |
| rs10838267 | A                    | NA          | NA      | 0.327     | 0.320        | 9944    | 9546       | 1.03 (0.99-1.08) | 0.176                 | rs10838267     | A    | 0.324     | 0.340        | 5958    | 5684       | 0.993         | 0.98 (0.93-1.04) | 0.552                 | 1.01 (0.98-1.05) | 0.498                        | 0.189 | -         |
| rs6756513  | A                    | NA          | NA      | 0.315     | 0.316        | 10112   | 9787       | 1.00 (0.95-1.04) | 0.835                 | rs6756513      | A    | 0.273     | 0.286        | 5958    | 5684       | 0.949         | 0.98 (0.92-1.04) | 0.565                 | 0.99 (0.96-1.03) | 0.610                        | 0.735 | Yes       |
| rs35418111 | A                    | NA          | NA      | 0.240     | 0.226        | 8959    | 8450       | 1.07 (1.01-1.13) | 0.014                 | rs35418111     | A    | 0.181     | 0.170        | 5958    | 5684       | 0.963         | 1.05 (0.98-1.12) | 0.150                 | 1.06 (1.02-1.11) | $4.69 \times 10^{-3}$        | 0.753 | Yes       |
| rs13212889 | A                    | rs6940159   | 0.8     | 0.130     | 0.120        | 10335   | 10217      | 1.11 (1.04-1.18) | $1.48 \times 10^{-3}$ | rs6940159      | C    | 0.187     | 0.192        | 5958    | 5684       | 0.958         | 1.09 (1.01-1.16) | 0.019                 | 1.10 (1.05-1.15) | $8.31 \times 10^{-5}$        | 0.718 | Yes       |
| rs9460685  | G                    | rs7765429   | 1       | 0.082     | 0.077        | 10204   | 10215      | 1.03 (0.95-1.11) | 0.470                 | rs7765429      | C    | 0.179     | 0.200        | 5958    | 5684       | 0.997         | 1.03 (0.96-1.10) | 0.400                 | 1.03 (0.98-1.08) | 0.268                        | 0.975 | Yes       |
| rs1962901  | G                    | rs2849506   | 1       | 0.472     | 0.479        | 9699    | 9581       | 0.97 (0.93-1.01) | 0.184                 | rs2849506      | C    | 0.484     | 0.484        | 5958    | 5684       | 0.987         | 0.98 (0.93-1.03) | 0.436                 | 0.97 (0.94-1.01) | 0.127                        | 0.834 | Yes       |
| rs7768862  | A                    | NA          | NA      | 0.281     | 0.296        | 10405   | 10324      | 0.93 (0.89-0.97) | $9.45 \times 10^{-4}$ | rs7768862      | A    | 0.282     | 0.299        | 5958    | 5684       | 0.995         | 0.99 (0.93-1.04) | 0.627                 | 0.95 (0.92-0.98) | $3.67 \times 10^{-3}$        | 0.098 | Yes       |
| rs3790585  | T                    | NA          | NA      | 0.274     | 0.283        | 10150   | 10036      | 0.94 (0.90-0.99) | 0.011                 | rs3790585      | T    | 0.346     | 0.353        | 5958    | 5684       | 1             | 0.94 (0.89-0.99) | 0.032                 | 0.94 (0.91-0.98) | $8.68 \times 10^{-4}$        | 0.995 | Yes       |
| rs453974   | C                    | rs144145984 | 0.9     | 0.394     | 0.393        | 10416   | 10366      | 0.99 (0.95-1.03) | 0.621                 | rs144145984    | CT   | 0.421     | 0.434        | 5958    | 5684       | 0.983         | 0.91 (0.85-0.96) | $4.22 \times 10^{-4}$ | 0.96 (0.93-0.99) | 0.010                        | 0.013 | Yes       |
| rs6555134  | T                    | NA          | NA      | 0.261     | 0.269        | 9958    | 9718       | 0.96 (0.92-1.01) | 0.130                 | rs6555134      | T    | 0.256     | 0.285        | 5958    | 5684       | 0.971         | 0.99 (0.93-1.05) | 0.829                 | 0.97 (0.94-1.01) | 0.180                        | 0.460 | Yes       |
| rs11947923 | T                    | NA          | NA      | 0.282     | 0.288        | 10262   | 10031      | 0.98 (0.94-1.03) | 0.443                 | rs11947923     | T    | 0.302     | 0.300        | 5958    | 5684       | 0.904         | 1.03 (0.97-1.09) | 0.299                 | 1.00 (0.96-1.04) | 0.990                        | 0.197 | -         |
| rs1060604  | C                    | rs2758598   | 1       | 0.149     | 0.147        | 10379   | 10318      | 1.03 (0.97-1.09) | 0.392                 | rs2758598      | A    | 0.179     | 0.188        | 5958    | 5684       | 0.996         | 1.03 (0.96-1.10) | 0.395                 | 1.03 (0.98-1.07) | 0.229                        | 0.919 | Yes       |
| rs855596   | T                    | NA          | NA      | 0.067     | 0.073        | 10358   | 10247      | 0.90 (0.83-0.98) | 0.013                 | rs855596       | T    | 0.071     | 0.081        | 5958    | 5684       | 0.975         | 0.88 (0.78-0.98) | 0.014                 | 0.89 (0.84-0.95) | $5.22 \times 10^{-4}$        | 0.697 | Yes       |
| rs9316500  | T                    | NA          | NA      | 0.332     | 0.321        | 9290    | 8179       | 1.06 (1.01-1.11) | 0.022                 | rs9316500      | T    | 0.373     | 0.400        | 5958    | 5684       | 1             | 1.04 (0.98-1.09) | 0.183                 | 1.05 (1.01-1.09) | $9.06 \times 10^{-3}$        | 0.623 | Yes       |
| rs11281251 | DEL                  | NA          | NA      | 0.187     | 0.188        | 10021   | 9993       | 0.99 (0.94-1.04) | 0.717                 | rs11281251     | DEL  | 0.175     | 0.193        | 5958    | 5684       | 0.994         | 0.99 (0.92-1.06) | 0.765                 | 1.01 (0.97-1.05) | 0.737                        | 0.550 | -         |
| rs34331122 | DEL                  | NA          | NA      | 0.470     | 0.463        | 10286   | 10164      | 1.03 (0.98-1.07) | 0.233                 | rs34331122     | DEL  | 0.454     | 0.443        | 5958    | 5684       | 0.94          | 1.04 (0.99-1.10) | 0.146                 | 1.03 (1.00-1.07) | 0.068                        | 0.657 | Yes       |
| rs78588049 | DEL                  | NA          | NA      | 0.142     | 0.149        | 10108   | 9558       | 0.92 (0.87-0.98) | $7.11 \times 10^{-3}$ | rs78588049     | DEL  | 0.172     | 0.181        | 5958    | 5684       | 0.985         | 0.97 (0.91-1.04) | 0.460                 | 0.94 (0.90-0.99) | 0.011                        | 0.241 | Yes       |
| rs4322627  | T                    | rs8027365   | 0.99    | 0.382     | 0.388        | 10108   | 9558       | 1.00 (0.94-1.06) | 0.948                 | rs8027365      | C    | 0.338     | 0.362        | 5958    | 5684       | 0.991         | 0.94 (0.89-0.99) | 0.032                 | 0.97 (0.93-1.01) | 0.116                        | 0.142 | Yes       |

**Supplementary Table 4. Conditional analysis to search for secondary signals for newly associated loci**

| SNP        | Chr | BP       | Test | Other | Adjusted SNP | EAF  | OR (95% CI)      | P                     |
|------------|-----|----------|------|-------|--------------|------|------------------|-----------------------|
| rs1911669  | 4   | 48065981 | A    | G     | rs11944638   | 0.25 | 0.97 (0.96-0.98) | $1.37 \times 10^{-5}$ |
| rs1567217  | 4   | 48068783 | A    | G     | rs11944638   | 0.25 | 0.97 (0.96-0.98) | $1.29 \times 10^{-5}$ |
| rs34900354 | 4   | 48072160 | T    | TC    | rs11944638   | 0.25 | 0.97 (0.96-0.98) | $1.44 \times 10^{-5}$ |
| rs62301688 | 4   | 48073073 | T    | C     | rs11944638   | 0.25 | 0.97 (0.96-0.98) | $1.43 \times 10^{-5}$ |
| rs2013231  | 4   | 48089458 | A    | T     | rs11944638   | 0.75 | 1.03 (1.01-1.04) | $4.96 \times 10^{-5}$ |
| rs7693779  | 4   | 48186152 | A    | G     | rs11944638   | 0.35 | 1.04 (1.02-1.05) | $4.55 \times 10^{-5}$ |

The estimates for each individual study were obtained from conditional analysis with the additional adjustment of rs11944638 in the regression model or by GCTA -COJO.

**Supplementary Table 5. Candidate genes identified by expression quantitative loci analysis**

| SNP         | Gene             | Gene location            | Chr | BP        | Test | SBCS (N=151) |       |      |                       | GTEx (N=85) |      |                       |       | TCGA (N=672) |                      |       | Metabric (N=1904) |                       |  |
|-------------|------------------|--------------------------|-----|-----------|------|--------------|-------|------|-----------------------|-------------|------|-----------------------|-------|--------------|----------------------|-------|-------------------|-----------------------|--|
|             |                  |                          |     |           |      | Other        | Beta  | SE   | P                     | Beta        | SE   | P                     | Beta  | SE           | P                    | Beta  | SE                | P                     |  |
| rs35418111  | <i>YBEY</i>      | Chr21:47706250-47717665  | 21  | 47856670  | G    | A            | -0.33 | 0.12 | $9.6 \times 10^{-3}$  | -0.84       | 0.21 | $1.0 \times 10^{-4}$  | -0.27 | 0.10         | $5.2 \times 10^{-3}$ | -0.2  | 0.02              | $3.7 \times 10^{-20}$ |  |
| rs8027365   | <i>SNUPN</i>     | Chr15:75890423-75918810  | 15  | 75808740  | A    | C            | -0.17 | 0.08 | 0.02                  | -0.27       | 0.11 | 0.015                 | -0.24 | 0.06         | $9.6 \times 10^{-5}$ | -0.05 | 0.008             | $4.6 \times 10^{-10}$ |  |
| rs8027365   | <i>MAN2C1</i>    | Chr15:75647547-75660971  | 15  | 75808740  | A    | C            | -0.21 | 0.03 | $2.0 \times 10^{-11}$ | -0.68       | 0.10 | $3.2 \times 10^{-9}$  | -0.14 | 0.07         | 0.04                 | -0.13 | 0.008             | $4.2 \times 10^{-58}$ |  |
| rs11281251  | <i>LINC00886</i> | Chr3:156465134-156534851 | 3   | 156519412 | T    | TTGTGAC      | 0.47  | 0.10 | $1.0 \times 10^{-5}$  | 0.77        | 0.09 | $3.9 \times 10^{-13}$ | NA    | NA           | NA                   | NA    | NA                | NA                    |  |
| rs34331122  | <i>TBX1</i>      | Chr22:19744225-19771116  | 22  | 19762428  | C    | CTT          | -0.26 | 0.09 | $5.5 \times 10^{-3}$  | 0.16        | 0.12 | 0.175                 | -0.15 | 0.04         | $2.0 \times 10^{-4}$ | -0.12 | 0.01              | $2.8 \times 10^{-17}$ |  |
| rs144145984 | <i>LOXL2</i>     | Chr8:23154701-23282841   | 8   | 23644003  | CT   | C            | 0.16  | 0.05 | $4.3 \times 10^{-3}$  | NA          | NA   | NA                    | 0.01  | 0.06         | 0.817                | 0.01  | 0.004             | 0.013                 |  |
| rs144145984 | <i>STC1</i>      | Chr8:23699427-23712320   | 8   | 23644003  | CT   | C            | 0.14  | 0.09 | 0.11                  | NA          | NA   | NA                    | 0.17  | 0.06         | $3.4 \times 10^{-3}$ | 0.36  | 0.03              | $4.1 \times 10^{-25}$ |  |
| rs2758598   | <i>SEMA4A</i>    | Chr1:156117156-156147543 | 1   | 156194339 | G    | A            | -0.03 | 0.10 | 0.73                  | -0.13       | 0.05 | 0.021                 | -0.06 | 0.05         | 0.254                | -0.03 | 0.01              | 0.0497                |  |
| rs3790585   | <i>MUTYH</i>     | Chr1:45794834-45806142   | 1   | 46023356  | A    | T            | 0.02  | 0.07 | 0.81                  | 0.15        | 0.13 | 0.251                 | 0.21  | 0.08         | $8.4 \times 10^{-3}$ | 0.08  | 0.01              | $6.5 \times 10^{-16}$ |  |

**Supplementary Table 6. Transcriptome-wide association analysis for candidate genes identified by eQTL analysis**

| Gene             | Location                 | Breast-tissue model |                             |                            |       |                      |                            |       |                      |                | Cross-tissue model          |                            |       |                      |                            |       |                      |
|------------------|--------------------------|---------------------|-----------------------------|----------------------------|-------|----------------------|----------------------------|-------|----------------------|----------------|-----------------------------|----------------------------|-------|----------------------|----------------------------|-------|----------------------|
|                  |                          | ABCC                |                             |                            |       |                      | BCAC                       |       |                      |                | ABCC                        |                            |       |                      |                            | BCAC  |                      |
|                  |                          | R <sup>2</sup>      | No. of SNP <sub>model</sub> | No. of SNP <sub>used</sub> | Z     | P                    | No. of SNP <sub>used</sub> | Z     | P                    | R <sup>2</sup> | No. of SNP <sub>model</sub> | No. of SNP <sub>used</sub> | Z     | P                    | No. of SNP <sub>used</sub> | Z     | P                    |
| <i>LINC00886</i> | Chr3:156465134-156534851 | 0.48                | 89                          | 89                         | -0.54 | 0.59                 | 88                         | -2.93 | 3.4×10 <sup>-3</sup> | 0.52           | 109                         | 105                        | -1.14 | 0.25                 | 107                        | -4.07 | 4.7×10 <sup>-5</sup> |
| <i>YBEY</i>      | Chr21:47706250-47717665  | 0.40                | 27                          | 27                         | 2.22  | 0.03                 | 27                         | 4.26  | 2.0×10 <sup>-5</sup> | 0.77           | 88                          | 87                         | 1.72  | 0.09                 | 87                         | 3.69  | 2.2×10 <sup>-4</sup> |
| <i>MAN2C1</i>    | Chr15:75647547-75660971  | 0.39                | 27                          | 27                         | -3.34 | 8.5×10 <sup>-4</sup> | 27                         | -5.32 | 1.0×10 <sup>-7</sup> | 0.73           | 43                          | 42                         | -3.05 | 2.3×10 <sup>-3</sup> | 42                         | -4.99 | 6.0×10 <sup>-7</sup> |
| <i>SEMA4A</i>    | Chr1:156117156-156147543 | 0.14                | 14                          | 14                         | 2.00  | 0.05                 | 14                         | 3.19  | 1.4×10 <sup>-3</sup> | 0.27           | 76                          | 76                         | 2.23  | 0.03                 | 76                         | 5.49  | 4.1×10 <sup>-8</sup> |
| <i>SNUPN</i>     | Chr15:75890423-75918810  | 0.03                | 4                           | 4                          | 0.01  | 0.99                 | 4                          | -3.63 | 2.9×10 <sup>-4</sup> | 0.41           | 38                          | 37                         | -1.48 | 0.14                 | 38                         | -4.49 | 7.1×10 <sup>-6</sup> |
| <i>MUTYH</i>     | Chr1:45794834-45806142   | 0.04                | 12                          | 12                         | -1.62 | 0.11                 | 12                         | 3.51  | 4.5×10 <sup>-4</sup> | 0.14           | 34                          | 32                         | 2.91  | 3.6×10 <sup>-3</sup> | 33                         | 2.98  | 2.9×10 <sup>-3</sup> |
| <i>STC1</i>      | Chr8:23699427-23712320   | -                   | -                           | -                          | -     | -                    | -                          | -     | -                    | 0.03           | 67                          | 64                         | -0.26 | 0.80                 | 65                         | -3.54 | 4.1×10 <sup>-4</sup> |

No. of SNP<sub>model</sub>: number of SNPs included in the prediction model.

No. of SNP<sub>used</sub>: number of SNPs included in the association analysis.

**Supplementary Table 7. Summary of association directions**

| SNP         | Gene             | Closest gene                    | Allele | BC risk | eQTL analysis | Gene-based analysis |
|-------------|------------------|---------------------------------|--------|---------|---------------|---------------------|
| rs35418111  | <i>YBEY</i>      | <i>PCNT, intron</i>             | G      | -       | -             | Oncogenic           |
| rs8027365   | <i>SNUPN</i>     | <i>PTPN9, intron</i>            | A      | +       | -             | Tumor suppressing   |
| rs8027365   | <i>MAN2C1</i>    | <i>PTPN9, intron</i>            | A      | +       | -             | Tumor suppressing   |
| rs11281251  | <i>LINC00886</i> | <i>LINC00886, intron</i>        | T      | -       | +             | Tumor suppressing   |
| rs34331122  | <i>TBX1</i>      | <i>TBX1, intron</i>             | C      | +       | -             | NA                  |
| rs144145984 | <i>LOXL2</i>     | <i>LOC107986930, intergenic</i> | CT     | -       | +             | NA                  |
| rs144145984 | <i>STC1</i>      | <i>LOC107986930, intergenic</i> | CT     | -       | +             | Tumor suppressing   |
| rs2758598   | <i>SEMA4A</i>    | <i>PMF1, intron</i>             | G      | -       | -             | Oncogenic           |
| rs3790585   | <i>MUTYH</i>     | <i>AKR1A1, intron</i>           | A      | +       | +             | Oncogenic           |

**Supplementary Table 8. Additional significant loci uncovered by cross-ancestry Meta-analysis**

| SNP        | Chr | BP       | Test | Other | Locus  | Nearest Genes | Asian-specific Meta-analysis |                  |       | European-specific Meta-analysis |                  |          | Cross-ancestry Meta-analysis |                  |          | I <sup>2</sup> , % | P <sub>heterogeneity</sub> |
|------------|-----|----------|------|-------|--------|---------------|------------------------------|------------------|-------|---------------------------------|------------------|----------|------------------------------|------------------|----------|--------------------|----------------------------|
|            |     |          |      |       |        |               | AF                           | OR (95% CI)      | P     | AF                              | OR (95% CI)      | P        | AF                           | OR (95% CI)      | P        |                    |                            |
| rs62134416 | 2   | 69389757 | A    | T     | 2p13.3 | <i>ANTXR1</i> | 0.77                         | 1.03 (1.00-1.06) | 0.086 | 0.44                            | 1.03 (1.02-1.05) | 1.39E-07 | 0.48                         | 1.03 (1.02-1.04) | 2.76E-08 | 0                  | 0.793                      |
| rs3829964  | 6   | 36644498 | T    | C     | 6p21.2 | <i>CDKN1A</i> | 0.29                         | 0.97 (0.94-1.00) | 0.039 | 0.51                            | 0.97 (0.96-0.98) | 9.38E-08 | 0.48                         | 0.97 (0.96-0.98) | 1.05E-08 | 0                  | 0.871                      |
| rs218872   | 8   | 23655784 | T    | G     | 8p21.2 | <i>STC1</i>   | 0.25                         | 1.04 (1.01-1.07) | 0.016 | 0.41                            | 1.03 (1.02-1.05) | 8.93E-08 | 0.38                         | 1.03 (1.02-1.05) | 4.88E-09 | 0                  | 0.824                      |



**Supplementary Table 9. Results of MR-MEGA for rs2758598 and rs142360995**

| SNP                      | Chr | BP        | Test | Other | Locus   | Meta-analysis |                  |                       | <i>P</i> heterogeneity |
|--------------------------|-----|-----------|------|-------|---------|---------------|------------------|-----------------------|------------------------|
|                          |     |           |      |       |         | AF            | OR (95% CI)      | P                     |                        |
| rs2758598                | 1   | 156194339 | A    | G     | 1q22    |               |                  |                       |                        |
| <i>Asian-Specific</i>    |     |           |      |       |         | 0.16          | 1.07 (1.03-1.11) | $1.8 \times 10^{-4}$  |                        |
| <i>European-specific</i> |     |           |      |       |         | 0.33          | 1.03 (1.02-1.05) | $8.4 \times 10^{-7}$  |                        |
| <i>Cross-ancestry</i>    |     |           |      |       |         | 0.31          | 1.04 (1.02-1.05) | $3.6 \times 10^{-9}$  |                        |
| <i>MR-MEGA</i>           |     |           |      |       |         |               |                  | $9.9 \times 10^{-10}$ | 0.007                  |
| rs142360995              | 8   | 118205719 | A    | G     | 8q24.11 |               |                  |                       |                        |
| <i>Asian-Specific</i>    |     |           |      |       |         | 0.09          | 1.13 (1.07-1.18) | $4.1 \times 10^{-6}$  |                        |
| <i>European-specific</i> |     |           |      |       |         | 0.20          | 1.03 (1.02-1.05) | $1.0 \times 10^{-5}$  |                        |
| <i>Cross-ancestry</i>    |     |           |      |       |         | 0.19          | 1.04 (1.03-1.06) | $3.0 \times 10^{-8}$  |                        |
| <i>MR-MEGA</i>           |     |           |      |       |         |               |                  | $8.1 \times 10^{-9}$  | 0.007                  |

Supplementary Table 10. Evaluate the association of polygenic risk score with breast cancer risk in Shanghai Women's Health Study

| PRS                       | Asian-specific weights |      |      |      | P        |
|---------------------------|------------------------|------|------|------|----------|
|                           | case/control           | OR   | L95  | U95  |          |
| Continuous, 1 SD          | -                      | 1.44 | 1.28 | 1.61 | 4.62E-10 |
| AUC: 0.601 (A); 0.602 (C) |                        |      |      |      |          |
| Decile 1                  | 19/206                 | Ref. |      |      |          |
| Decile 2                  | 25/206                 | 1.32 | 0.70 | 2.46 | 0.391    |
| Decile 3                  | 24/206                 | 1.26 | 0.67 | 2.38 | 0.469    |
| Decile 4                  | 31/206                 | 1.63 | 0.89 | 2.98 | 0.111    |
| Decile 5                  | 42/206                 | 2.21 | 1.24 | 3.93 | 0.007    |
| Decile 6                  | 27/205                 | 1.43 | 0.77 | 2.65 | 0.258    |
| Decile 7                  | 36/206                 | 1.89 | 1.05 | 3.41 | 0.033    |
| Decile 8                  | 36/206                 | 1.89 | 1.05 | 3.41 | 3.32E-02 |
| Decile 9                  | 59/206                 | 3.11 | 1.79 | 5.39 | 5.69E-05 |
| Decile 10                 | 69/206                 | 3.63 | 2.11 | 6.25 | 3.26E-06 |
| AUC: 0.610 (A); 0.611 (C) |                        |      |      |      |          |

AUC (A) or (C): Area under the curve, estimated using PRS weighted by effect estimates from Asian-specific or cross-ethnic meta-analysis.

Supplementary Table 11. Associations between the 28 novel risk SNPs and breast cancer risk with adjustment of 10 PCs

| SNP         | EAF  | OR (95% CI), 2 PCs | OR (95% CI), 10 PCs |
|-------------|------|--------------------|---------------------|
| rs72906468  | 0.76 | 1.04 (1.03-1.05)   | 1.04 (1.02-1.05)    |
| rs3790585   | 0.81 | 1.04 (1.03-1.06)   | 1.04 (1.03-1.06)    |
| rs2758598   | 0.31 | 1.04 (1.02-1.05)   | 1.04 (1.02-1.05)    |
| rs6756513   | 0.29 | 0.96 (0.95-0.98)   | 0.97 (0.95-0.98)    |
| rs73006998  | 0.22 | 0.93 (0.90-0.95)   | 0.92 (0.90-0.95)    |
| rs11281251  | 0.37 | 0.97 (0.95-0.98)   | 0.97 (0.95-0.98)    |
| rs11944638  | 0.85 | 1.06 (1.04-1.08)   | 1.06 (1.04-1.08)    |
| rs11947923  | 0.36 | 0.97 (0.96-0.98)   | 0.97 (0.96-0.98)    |
| rs6555134   | 0.54 | 0.97 (0.95-0.98)   | 0.97 (0.95-0.98)    |
| rs7765429   | 0.49 | 0.97 (0.96-0.98)   | 0.97 (0.96-0.98)    |
| rs7768862   | 0.48 | 0.97 (0.96-0.98)   | 0.97 (0.96-0.98)    |
| rs6940159   | 0.43 | 0.96 (0.95-0.98)   | 0.97 (0.96-0.98)    |
| rs144145984 | 0.55 | 0.97 (0.96-0.98)   | 0.97 (0.96-0.98)    |
| rs2849506   | 0.41 | 0.97 (0.96-0.98)   | 0.97 (0.96-0.98)    |
| rs142360995 | 0.19 | 1.04 (1.03-1.06)   | 1.04 (1.03-1.06)    |
| rs10820600  | 0.48 | 0.97 (0.96-0.98)   | 0.97 (0.96-0.98)    |
| rs541079479 | 0.39 | 1.03 (1.02-1.05)   | 1.03 (1.02-1.05)    |
| rs2901157   | 0.85 | 1.05 (1.03-1.07)   | 1.05 (1.03-1.07)    |
| rs10838267  | 0.51 | 1.04 (1.03-1.05)   | 1.04 (1.02-1.05)    |
| rs78588049  | 0.19 | 0.96 (0.95-0.97)   | 0.96 (0.95-0.97)    |
| rs855596    | 0.04 | 0.91 (0.89-0.94)   | 0.91 (0.89-0.94)    |
| rs9316500   | 0.64 | 1.03 (1.02-1.05)   | 1.03 (1.02-1.05)    |
| rs75004998  | 0.36 | 0.97 (0.96-0.98)   | 0.97 (0.96-0.98)    |
| rs8027365   | 0.71 | 1.04 (1.03-1.05)   | 1.04 (1.03-1.05)    |
| rs76535198  | 0.83 | 1.05 (1.04-1.07)   | 1.05 (1.03-1.07)    |
| rs12481286  | 0.26 | 1.04 (1.03-1.06)   | 1.04 (1.03-1.06)    |
| rs35418111  | 0.12 | 1.07 (1.05-1.09)   | 1.07 (1.05-1.09)    |
| rs34331122  | 0.47 | 0.97 (0.96-0.98)   | 0.97 (0.96-0.98)    |

Supplementary Table 12. Statistical power for the association between SNP and breast cancer risk under various scenarios

|                                                                   | Effect allele frequency | Effect size (OR) | Power |
|-------------------------------------------------------------------|-------------------------|------------------|-------|
| Overall breast cancer,<br>N cases= 147,183, N control= 130,749    |                         |                  |       |
|                                                                   | 0.05                    | 1.08             | 0.815 |
|                                                                   | 0.10                    | 1.06             | 0.870 |
|                                                                   | 0.20                    | 1.05             | 0.969 |
|                                                                   | 0.25                    | 1.05             | 0.993 |
| ER-positive breast cancer,<br>N cases= 80,428, N control= 125,677 |                         |                  |       |
|                                                                   | 0.05                    | 1.10             | 0.886 |
|                                                                   | 0.10                    | 1.07             | 0.841 |
|                                                                   | 0.20                    | 1.06             | 0.972 |
|                                                                   | 0.25                    | 1.06             | 0.994 |
| ER-positive breast cancer,<br>N cases= 26,948, N control= 125,677 |                         |                  |       |
|                                                                   | 0.05                    | 1.15             | 0.888 |
|                                                                   | 0.10                    | 1.11             | 0.905 |
|                                                                   | 0.20                    | 1.08             | 0.870 |
|                                                                   | 0.25                    | 1.08             | 0.951 |

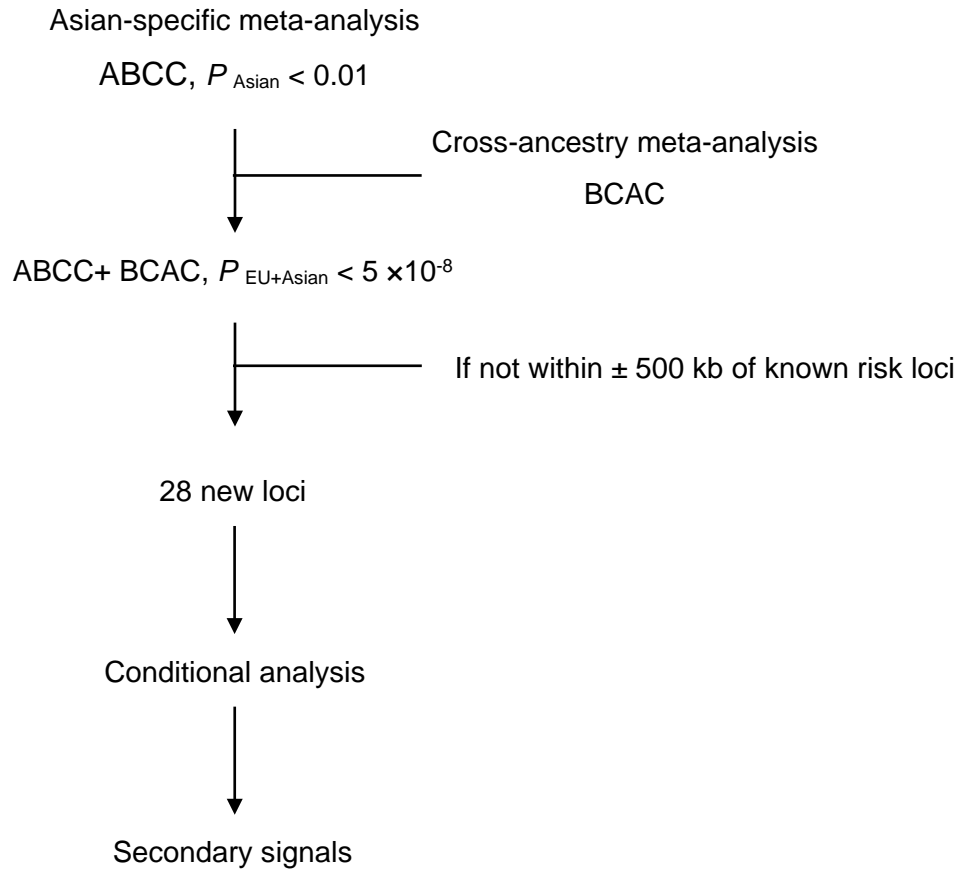

Supplementary Figure 1. Flowchart of identification of novel susceptibility loci for breast cancer.

Additional three novel loci were identified from the same procedures when loosen the  $P_{\text{Asian}} < 0.1$ .

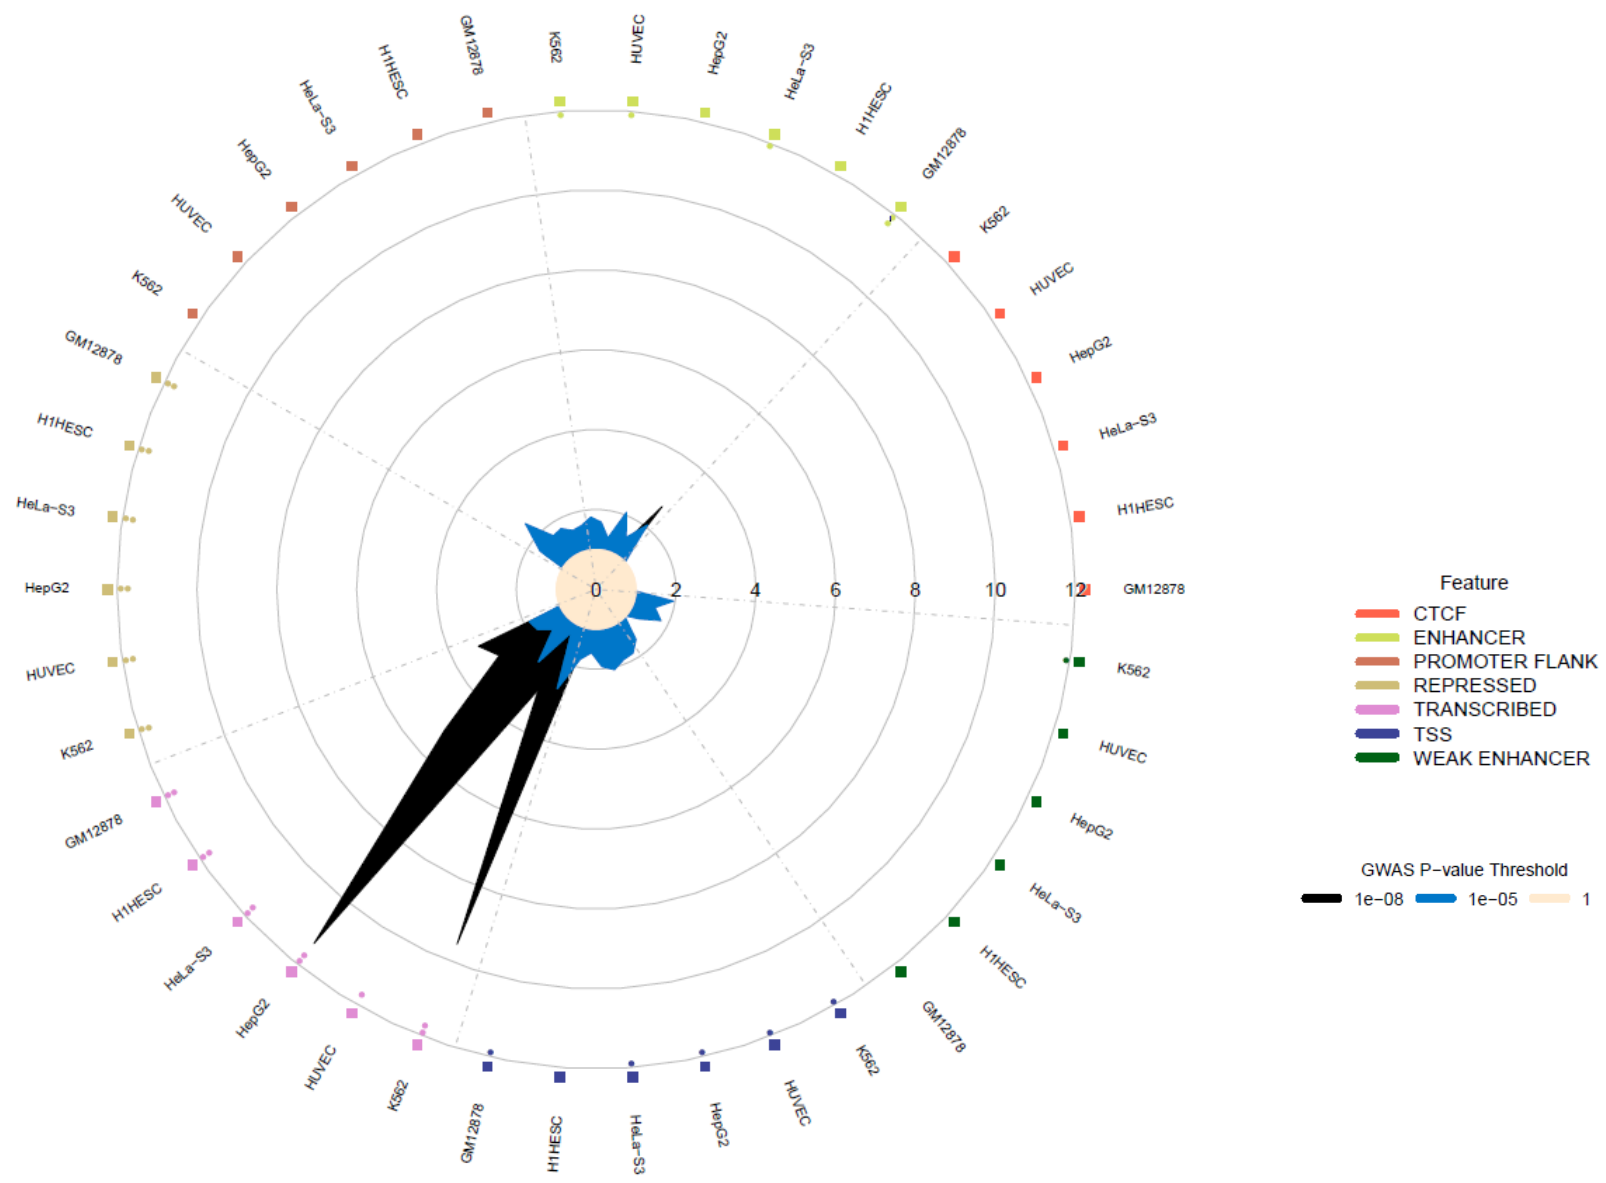

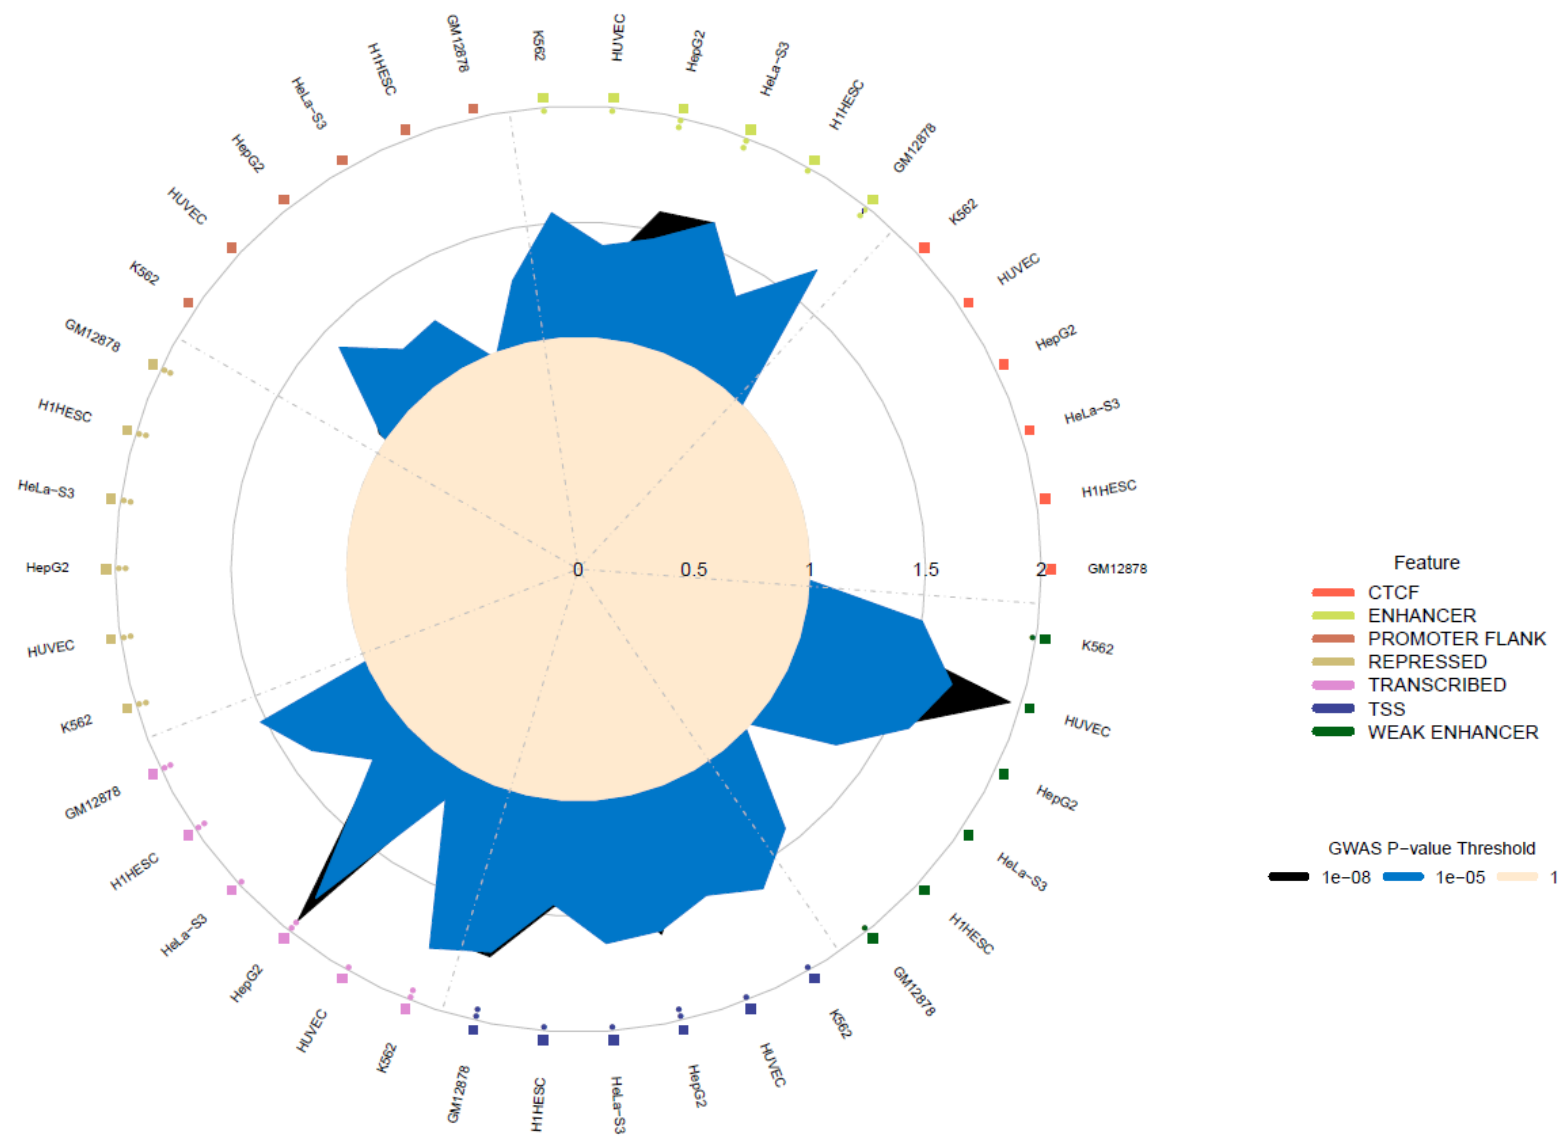

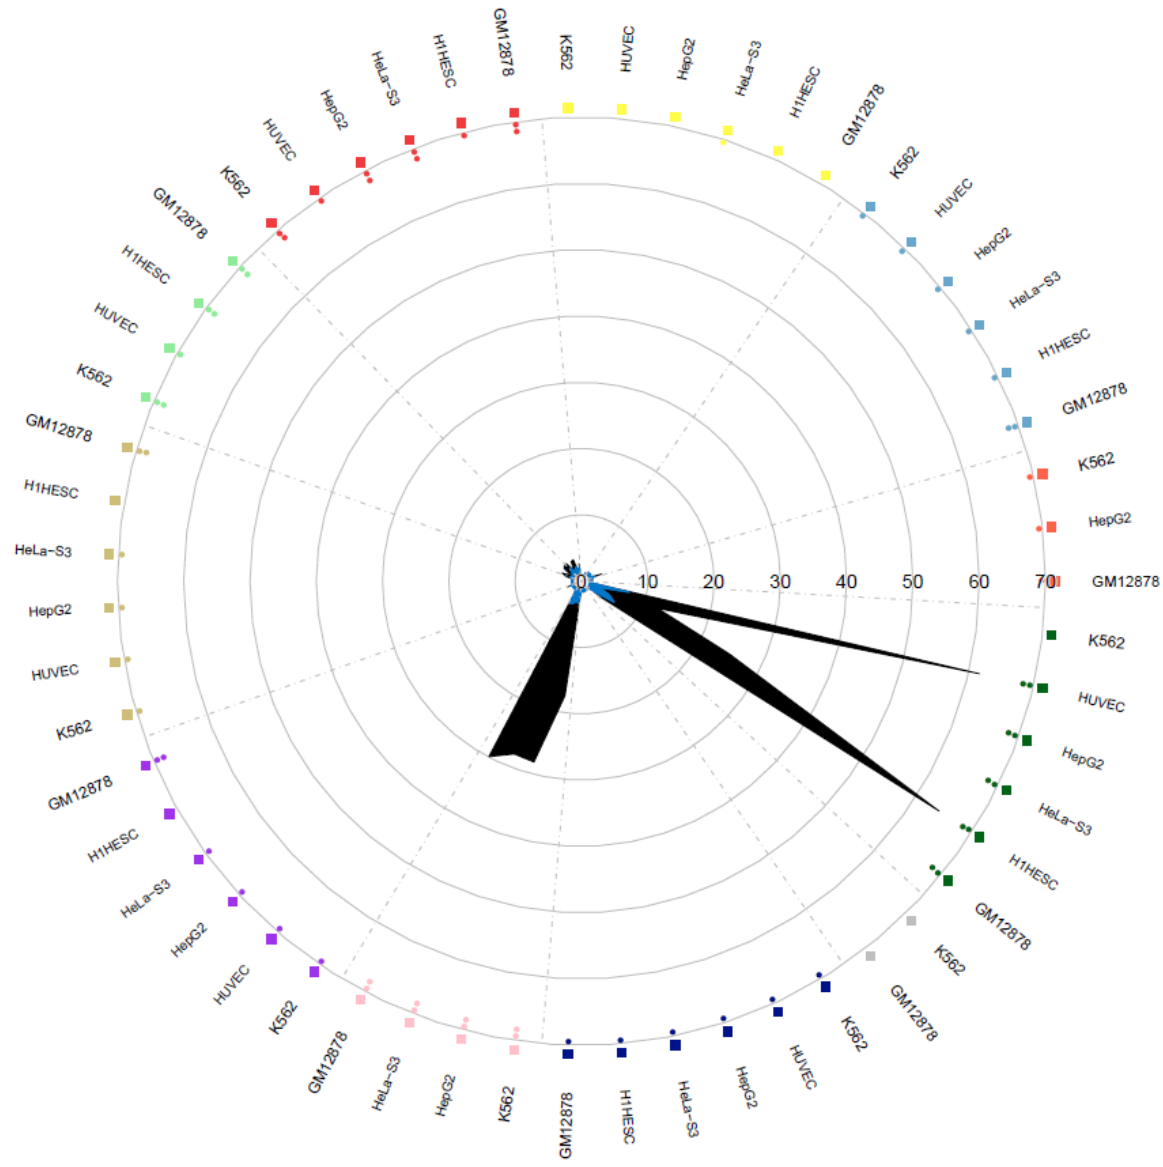

- Feature**
- H2AFZ
  - H3K27ac
  - H3K27me3
  - H3K36me3
  - H3K4me1
  - H3K4me2
  - H3K4me3
  - H3K79me2
  - H3K9ac
  - H3K9me3
  - H4K20me1

- GWAS P-value Threshold**
- $1e-08$
  - $1e-05$
  - 1



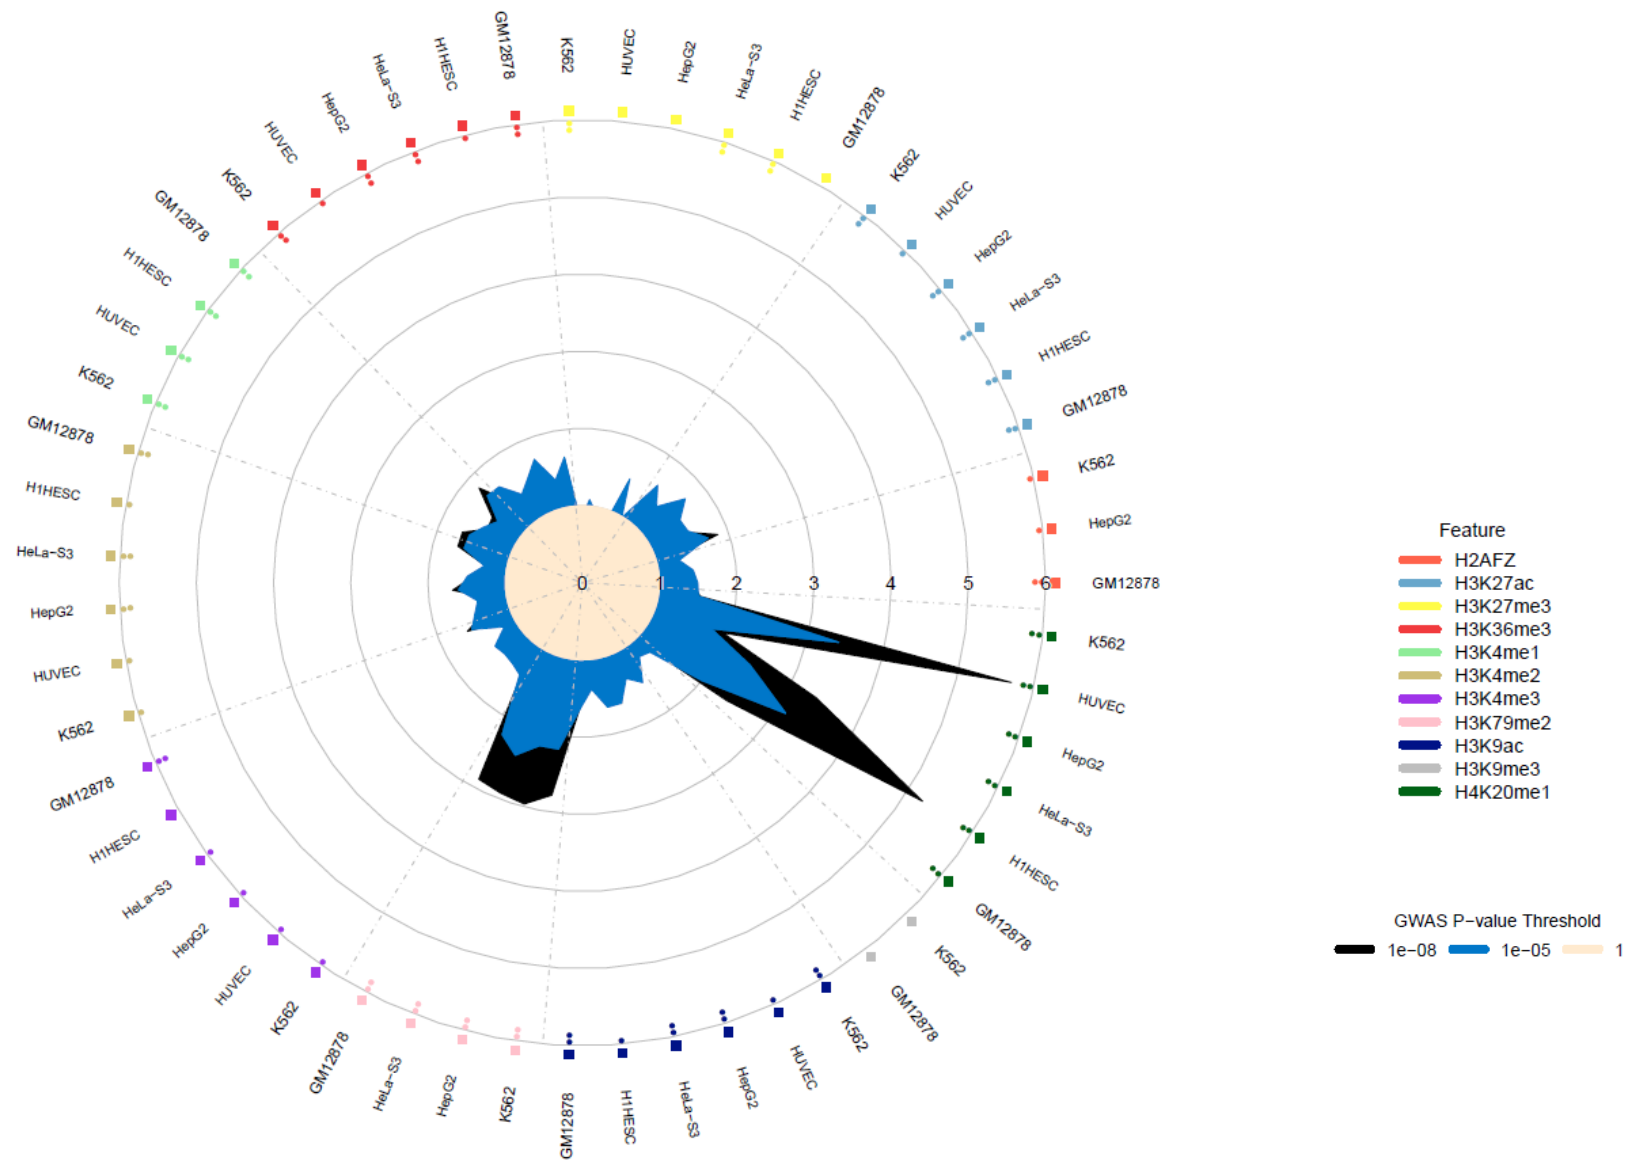

Supplementary Figure 2. Enrichment analysis of chromatin states and histone markers.

- A. Enrichment analysis of chromatin states for newly identified association signals
- B. Enrichment analysis of chromatin states for overall association signals
- C. Enrichment analysis of histone markers for newly identified signals
- D. Enrichment analysis of histone markers for overall association signals

## 1 **Supplementary Note 1.**

### 2 **1. Description of Studies of the Asia Breast Cancer Consortium (ABCC)**

#### 3 **Shanghai Breast Cancer Genetics Study (SBCGS)**

4 The Chinese participants were drawn from Shanghai Breast Cancer Genetics Study  
5 (SBCGS), which consists of the **Shanghai Breast Cancer Study (SBCS)**, **Shanghai**  
6 **Breast Cancer Survival Study (SBCSS)**, **Shanghai Endometrial Cancer Study**  
7 **(SECS, contributed control data only)**, and the **Shanghai Women's Health Study**  
8 **(SWHS)**, four large population-based studies in urban Shanghai. All participants  
9 provided written informed consent prior to interview, and institutional review boards of  
10 all institutes in both China and the United States approved the study.

#### 11 **Shanghai Breast Cancer Study (SBCS):**

12 The SBCS is a two-phase (SBCS-I and SBCS-II) population-based case-control study  
13 that recruited incident patients with breast cancer and controls in urban Shanghai, the  
14 largest commercial center in China.<sup>1,2</sup> In the initial phase (SBCS-I), subjects were  
15 recruited between August 1996 and March 1998. Through a rapid case-ascertainment  
16 system and the population-based Shanghai Cancer Registry, 1,602 eligible breast  
17 cancer cases diagnosed during the study period were identified, of which 1,459 cases  
18 (91.1%) completed in-person interviews. Two senior pathologists reviewed and  
19 confirmed cancer diagnoses for all patients. Controls were randomly selected from the  
20 general population using the Shanghai Resident Registry, a population registry  
21 containing demographic information for all residents of urban Shanghai. The inclusion  
22 criteria for controls were identical to those for cases, with the exception of a breast

23 cancer diagnosis. Among the 1,724 eligible controls, 1,556 (90.3%) completed in-  
24 person interviews. Our study used a structured questionnaire to elicit detailed  
25 information on demographic factors, and known/suspected risk factors for breast  
26 cancer. All participants were measured for their current weight, height, and  
27 circumference of the waist and hips. All interviews were tape-recorded and reviewed by  
28 the field supervisor and quality control staff to monitor the quality of interview data. For  
29 both cases and controls, blood samples (10 ml from each woman) were obtained who  
30 completed the in-person interview (1,193 (82%) cases and 1,310 (84%) controls). Using  
31 cotton swabs, a sample of exfoliated buccal cells was obtained from virtually all study  
32 participants who did not provide a blood sample. The second round of subject  
33 recruitment (SBCS-II) occurred between April 2002 and February 2005 using a protocol  
34 similar to the one used in the initial phase. Similar to the SBCS-I subjects, the majority  
35 of newly-recruited cases (n=1,932, 97.1%) and controls (n=1,857, 93.4%) provided a  
36 blood sample or an exfoliated buccal cell sample to the study. Our study used modified  
37 mouthwash method from initially reported by Lum A *et al.*,<sup>3</sup> and provided, on average,  
38 approximately 34 µg of DNA per sample. Eligibility criteria for study participation were  
39 identical for SBCS-I and SBCS-II except age. The age ranged from 25 to 65 years for  
40 SBCS-I, and from 25 to 70 years in SBCS-II.

#### 41 **Shanghai Breast Cancer Survival Study (SBCSS):**

42 The SBCSS included newly diagnosed 6,303 breast cancer cases ascertained via the  
43 population-based Shanghai Cancer Registry between April 2002 and December 2006.<sup>1</sup>  
44 In-person interviews were conducted to collect information on known breast cancer risk  
45 factors as well as anthropometrics using a protocol and questionnaire similar to that

46 used in the SBCS. Patient medical charts were also reviewed to obtain detailed  
47 information on disease related characteristics and cancer treatment. Using the modified  
48 mouthwash method, buccal cell samples were collected from 96% of study participants.  
49 Total 1,469 breast cancer patients participated in both studies (SBCS-II and SBCSS)  
50 due to the time overlap in the participant recruitment period.

#### 51 **Shanghai Endometrial Cancer Study (SECS):**

52 The SECS is a population-based, case-control study of endometrial cancer conducted  
53 between January 1997 and December 2003 using a protocol similar to the SBCS; only  
54 community controls from the SECS were included in the present study.<sup>1</sup> Except a few  
55 questionnaires related specifically to breast or endometrial cancer risk, the  
56 questionnaires used in the SECS and the SBCS were virtually identical. Eligible cases  
57 were identified through the population-based Shanghai Cancer Registry and controls  
58 were randomly selected from the general population of Shanghai using the Shanghai  
59 Resident Registry and were age frequency matched to cases. Women with a history of  
60 cancer or hysterectomy were not eligible. Trained interviewers conducted in-person  
61 interviews to collect detailed information on demographic factors, menstrual and  
62 reproductive history, hormone use, prior disease history, physical activity, tobacco and  
63 alcohol use, weight, and family history of cancer. Anthropometrics measurements were  
64 taken. A total of 1,039 controls provided a blood sample or buccal cell sample using the  
65 mouthwash method, and these women were included.

#### 66 **Shanghai Women's Health Study (SWHS):**

67 The SWHS is a population-based cohort study of approximately 75,000 adult women  
68 who were recruited from urban Shanghai between 1997 and 2000.<sup>4</sup> Among those who

69 completed baseline survey through an in-person interview, 56,831 (75.8%) donated a  
70 blood sample, and 65,754 (87.7%) donated a urine sample. An exfoliated buccal cell  
71 sample was collected from an additional 8,934 (49.3%) of the 18,111 subjects who did  
72 not provide a blood sample at baseline. Therefore, we have genomic DNA from about  
73 88% of cohort members. The cohort has been followed by a combination of record  
74 linkage and active follow-ups.<sup>4</sup> The first follow-up survey was conducted from 2000 to  
75 2002. Approximately 99.8% of cohort members (or their next of kin, if subjects were  
76 deceased) were interviewed. The response rates were 98.7% for the second follow-up  
77 survey (2002-2004), 96.7% for the third follow-up survey (2004-2007), and  
78 approximately 93% for the fourth follow-up (2007-2010). For non-respondents, cancer  
79 diagnosis and vital status can still be identified through the linkage of data from cancer  
80 and vital statistics registries, and thus ascertainment for cancer outcomes and total  
81 mortality is virtually complete in this cohort. In the current study, breast cancer patients  
82 identified in the SWHS and non-cases were included.

83 Participants in SBCGS have been genotyped by Affymetrix Genome-Wide Human SNP  
84 Array 6.0,<sup>1</sup> the Asian ExomeChip,<sup>5</sup> and the Multi-Ethnic Global Array (MEGA), which  
85 includes approximately 2 million variants, including ~80k custom content for a large  
86 study including multiple complex traits. Similar genotyping and QC procedures have  
87 been described previously.<sup>1,5</sup> After imputation and QC exclusions, the final data set  
88 included 2,511 cases and 2,135 controls for 11.1 million markers for the Affy6 dataset,  
89 1,563 cases and 2,396 controls for 2.95 million markers for the ExomeChip dataset, and  
90 1,794 cases and 2,059 controls for 14.1 million markers for the MEGA dataset.

91 **Hwasun Cancer Epidemiology Study-Breast (HCES-Br):**

92 The Hwasun Cancer Epidemiology Study (HCES-Br) is a hospital-based case-control  
93 study whose goal is to identify factors of the cancer development and clinical  
94 progression in a Korean population.<sup>6,7</sup> Included in this project were 3,387 female breast  
95 cancer cases, who were newly diagnosed between April 2004 and February 2013 at  
96 Chonnam National University Hwasun Hospital, a cancer specified hospital in  
97 Jeollanam-do province, South Korea. Patients with secondary or recurrent tumor were  
98 excluded. Controls were 3,186 women who were randomly selected from among  
99 women with no previous cancer diagnosis at enrollment in the Namwon Study and the  
100 Dong-gu study, ongoing community-based cohort studies in South Korea.<sup>8</sup> Genomic  
101 DNA was extracted from their peripheral blood. Demographics data and conventional  
102 factors of breast cancer were collected by structured questionnaire and review of  
103 medical records. All cases and control subjects provided the informed consent to  
104 participate in the study and Institutional Review Board of Chonnam National University  
105 Hwasun Hospital approved this study. In the HCES-Br, 274 cases and 273 controls  
106 were genotyped by MEGA. This study also contributed 5,574 cases and 3,793 controls  
107 for the replication study genotyped by Sequenom.

#### 108 **Seoul Breast Cancer Study (SeBCS):**

109 The SeBCS is a hospital-based case-control study conducted in two teaching hospitals  
110 in Seoul.<sup>9,10</sup> Total 2,342 incident breast patients histopathologically diagnosed with  
111 primary breast cancer were included in this project and they were consecutively  
112 recruited between 2001 and 2007. In-person interviews were conducted to collect  
113 information on known breast cancer risk factors and anthropometrics by using a  
114 protocol and questionnaire. Medical charts were reviewed to verify clinical information.

115 Eligible controls were derived from a large urban cohort that is participating in the Korea  
116 Genome Epidemiology Study (KoGES), which is an ongoing cohort study that has  
117 sought to understand the causes and risk factors of disease in South Korea. Total 2,052  
118 controls were selected between May 2006 and December 2007. They were frequency-  
119 matched to cases on the case's age at diagnosis in five-year intervals. Trained  
120 interviewers using a structured questionnaire determined the demographic  
121 characteristics of the controls, their family histories with regard to breast cancer in first-  
122 degree relatives, reproductive and menstrual factors, and life-style habits, using a  
123 protocol similar to the SeBCS. The SeBCS did not include women with a history of  
124 cancer. For the SeBCS1, Affymetrix 6.0 array was used for genotyping. After imputation  
125 and QC, the final data set included 2,246 cases and 2,052 controls for 7.3 million  
126 markers<sup>11</sup>. Additional 775 cases and 1,103 controls were included in the replication  
127 stage.

#### 128 **The Biobank Japan Project 1 (BBJ1):**

129 The DNA samples were recruited from the Biobank Japan Project  
130 (<http://biobankjp.org>).<sup>12,13</sup> A total of 2,642 individuals were included in BBJ1 who  
131 registered as breast cancer patients from the Biobank Japan. For controls, a total of  
132 2,099 for BBJ1 females consisting of healthy volunteers from Midosuji Rotary Club,  
133 Osaka, Japan, Health Science Research Resource Bank and individuals in the Biobank  
134 who do not have history of cancer for BBJ1 were included. For the BBJ1, Illumina  
135 OmniExpress BeadChip array was used for genotyping. After imputation and QC, the  
136 final data set included 11.1 million markers.<sup>11</sup>

137



138 **2. Description of Studies of the Breast Cancer Association Consortium (BCAC):**

139 **BCAC (Asian):** The studies included in the BCAC that contributed individual-level data  
140 to the Asian-specific meta-analysis were listed as Study, Country and BCAC project(s):  
141 ACP, Thailand, Oncoarray and iCOGS; CBCS, Canada, Oncoarray; HERPACC, Japan,  
142 Oncoarray and iCOGS; HKHBCFR, Hong Kong, Oncoarray; KOHBRA, Korea,  
143 Oncoarray; LAABC, USA, iCOGS; MYBRCA, Malaysia, Oncoarray and iCOGS; NC-  
144 BCFR, USA, Oncoarray; NGOBCS, Japan, Oncoarray; SBCGS, China, Oncoarray and  
145 iCOGS; SeBCS, Korea, Oncoarray and iCOGS; SGBCC, Singapore, Oncoarray and  
146 iCOGS; TWBCS, Taiwan, Oncoarray and iCOGS.

147 **Asia Cancer Program (ACP):**

148 The ACP is a hospital-based case-control study conducted in Thailand. Breast cancer  
149 cases were recruited between 1999-2000, and 2008-present at The National Cancer  
150 Institute (Central region), The Prince Songkla University Research Centre (South  
151 region), The HRH Princess Maha Chakri Sirindhorn Medical Centre (MSMC)-  
152 Srinakarinviroj University (Eastern region), Khon-Kaen University Cancer Centre (North-  
153 eastern region). Women who were less than 71 years of age and underwent biopsy were  
154 eligible to participate in the study. All cases were pathologically diagnosed as having  
155 breast cancer. Women resided in the same geographic area, younger than 71 years old,  
156 and reported no prior history of cancer were recruited as controls. In total, 944 invasive  
157 cases and 1,382 controls were included in the BCAC.

158 **Canadian Breast Cancer Study (CBCS):** The CBCS is a population-based case-  
159 control study conducted in Canada.<sup>14-17</sup> Incident cases diagnosed between 2005 and  
160 2009 were recruited from two areas, Vancouver, British Columbia and Kingston,

161 Ontario. The cases were ascertained either from the population cancer registry  
162 (Vancouver, British Columbia) or participants of the Hotel Dieu Breast Assessment  
163 Program (Kingston, Ontario). Cancer-free controls were recruited through the Screening  
164 Mammography Program of British Columbia or the Hotel Dieu Breast Assessment  
165 Program in Kingston, Ontario. Controls were frequency matched by 5-year age groups.

166 **Hospital-based Epidemiologic Research Program at Aichi Cancer Center**

167 **(HERPACC):** The participants were recruited from a hospital-based case-control study  
168 conducted in Aichi, Japan.<sup>18</sup> All incident breast cancer cases were newly diagnosed  
169 within 1 year from the first visit to the Aichi Cancer Center between 2001 and 2013.  
170 Controls were selected from pool of non-cancer patients who firstly visited Aichi Cancer  
171 Center between 2001 and 2011. Subjects with previous cancer history were excluded.

172 **Hong Kong Hereditary Breast Cancer (HKHBCFR):**

173 Genetic screening of high risk breast cancer patients were approached for the study  
174 enrollment from all hospitals in Hong Kong, China between 2006 and 2014.<sup>19-21</sup> Controls  
175 were selected from pool of non-cancer patients who visited hospitals in Hong Kong  
176 during the same period of recruitment as cases.

177 **Korean Hereditary Breast Cancer (KOHBRA):**

178 The KOHBRA study is an ongoing cohort study since 2007 to examine high risk groups  
179 for hereditary breast cancer such as female breast cancer patients with a family history,  
180 ovarian cancer, or other coincidental cancers, male breast cancer patients, and family  
181 members of breast cancer patients with BRCA1/2 mutation<sup>4</sup>. Final dataset included

182 selected 1,397 female cancer patients without BRCA1, 2 mutation among KOHBRA  
183 subjects recruited in 2007-2009.<sup>22</sup>

184 **Los Angeles County Asian-American Breast Cancer Case-Control Study (LAABC):**

185 The LAABC is a population-based case-control study of incident breast cancer among  
186 Asian American women in Los Angeles County. Breast cancer cases were ascertained  
187 through the Los Angeles Cancer Surveillance Program. The included women were  
188 identified as Chinese, Japanese or Filipino women (aged 25-74 years) with a  
189 histologically confirmed primary breast cancer diagnosed between 1996 and 2006.<sup>23-25</sup>

190 Controls were recruited from the same neighborhood as where cancer cases resided at  
191 the time of diagnosis. Cases and controls were frequency-matched on specific Asian  
192 ethnicities and 5-year age groups.

193 **Malaysian Breast Cancer Genetic Study (MYBRCA):**

194 Prevalent or incident breast cancer cases identified at the Breast Cancer Clinic in  
195 University Malaya Medical Centre from January 2003 to July 2014 and Subang Jaya  
196 Medical Centre from September 2012 to Sept 2014.<sup>26</sup> Controls are cancer-free  
197 individuals (37-74 years) selected from women attending mammographic screening at  
198 the same hospitals.

199 **Northern California Breast Cancer Family Registry (NC-BCFR):**

200 Incident breast cancer cases included women aged <65 years diagnosed from 1995-  
201 2009, identified through the SEER cancer registry of the Greater San Francisco Bay  
202 Area. All cases with indicators of increased genetic risk were eligible to enroll  
203 (diagnosed at age <35 years, personal history of ovarian or childhood cancer, bilateral

204 breast cancer with 1st diagnosis at age <50, family history of breast or ovarian cancer in  
205 first-degree relatives).<sup>27,28</sup> Cases not meeting these criteria were randomly sampled  
206 (2.5% of non-Hispanic whites, 32% of other race/ethnicities). Incident cases also  
207 included men aged <80 years diagnosed from 1995-1998. Controls were those  
208 unaffected family members enrolled from 1995-2011 or unaffected unrelated subjects  
209 identified through random digit dialing conducted from 1999-2000 in the San Francisco  
210 Bay Area. Controls were frequency matched to cases diagnosed from 1995-1998 on 5-  
211 year age group and race/ethnicity, at a ratio of 1 control per 2 cases. Only women were  
212 included in the current analysis.

### 213 **Nagano Breast Cancer Study (NGOBCS):**

214 The Nagano Breast Cancer Study is a multicenter, hospital-based case-control study  
215 which was conducted from May 2001 to September 2005 at four hospitals in Nagano  
216 Prefecture, Japan.<sup>29,30</sup> Cases were admitted to the four hospitals during the survey  
217 period who are a consecutive series of women ages 20-74 years with newly diagnosed,  
218 histologically confirmed invasive breast cancer. Among the 412 eligible patients, 405  
219 (98%) agreed to participate. Controls were selected from medical checkup examinees in  
220 two of the hospitals who were confirmed having no cancer, with one control matched for  
221 each case by age (within three years) and residential area during the study period. Only  
222 one declined to participate among potential control subjects. Written informed consent  
223 was obtained from 405 matched pairs. Since two controls refused to provide blood  
224 samples, the analysis was restricted to 403 matched pairs. Participants completed a  
225 self-administered questionnaire, which included questions on demographic  
226 characteristics, anthropometric factors, smoking habits, family history of cancer,

227 physical activity, medical history, and menstrual and reproductive history. Dietary habits  
228 were investigated using a 136- item semi-quantitative food-frequency questionnaire  
229 (FFQ), which was developed and validated in the Japanese population. The ER status  
230 of the patient's breast cancer tissue was obtained from medical records. Hormone  
231 receptor positivity values were determined either as specified by the laboratory that  
232 performed the assay, in accordance with the laboratory's written interpretation thereof,  
233 or both. The study protocol was approved by the Institutional Review Board of the  
234 National Cancer Center (Tokyo, Japan).

#### 235 **Shanghai Breast Cancer Genetics Study (SBCGS)**

236 The SBCGS has been described above, which also contributed samples to ABCC

#### 237 **Seoul Breast Cancer Study (SeBCS):**

238 The SeBCS has been described above, which also contributed samples to ABCC.

#### 239 **Singapore Breast Cancer Cohort (SGBCC):**

240 The SGBCC is an open cohort with a recruitment target of 16,000 patients diagnosed  
241 with either breast carcinoma in situ or invasive breast cancer. Recruitment started in  
242 2010. All breast cancer patients who are at least 21 years of age at diagnosis, who are  
243 citizens or permanent residents of Singapore and who are attending any of the seven  
244 tertiary hospitals are invited to participate in SGBCC. Cases are a mixture of prevalent  
245 and incident cases. Three main ethnic groups are represented, namely, Chinese,  
246 Malays and Indians. Controls matched by age and ethnicity were selected from the  
247 Multi-ethnic Cohort (Phase 2, part of the Singapore Population Health Studies  
248 (SPHS)<sup>31</sup>. Exclusion criteria for controls included a medical history of cancer, acute

249 myocardial infarction or stroke, or major psychiatric morbidity including schizophrenia,  
250 psychotic depression, and advanced Alzheimer's disease.

251 **Taiwanese Breast Cancer Study (TWBCS):**

252 The study is a part of an ongoing collaborative study with a focus on understanding the  
253 cause of breast cancer among Taiwanese.<sup>32,33</sup> Breast cancer patients were recruited  
254 from those who were diagnosed and treated at the Tri-Service General Hospital or the  
255 Changhua Christian Hospital between March 2002 and August 2005. The controls were  
256 randomly selected from women who attended the same hospitals for a comprehensive  
257 health examination during the same period. If any evidence of breast cancer,  
258 precancerous lesions of breast or other cancers was found, the subject was excluded  
259 from the control group. Epidemiologic data was collected from the participants via a  
260 structured questionnaire by research nurses. Blood biospecimen was also collected. All  
261 the participants provided their informed consent before the data and sample collection.

262 **BCAC (European):**

263 Summary statistics data of European descendants from studies involved in the BCAC  
264 OncoArray, iCOGS, and GWAS projects were obtained and utilized in the cross-  
265 ancestry meta-analysis. As described in details elsewhere, 61,282 female cases with  
266 breast cancer and 45,494 female controls of European ancestry were genotyped using  
267 the OncoArray.<sup>34</sup> The Collaborative Oncological Gene-environment Study (iCOGS)  
268 included 46,785 breast cancer cases and 42,892 controls.<sup>35</sup> In addition, summary  
269 statistics from 11 other breast cancer genome-wide association studies were also used  
270 in the meta-analysis with a combined sample of 14,910 cases and 17,588 controls. The

271 genotyping data were imputed by IMPUTE version 2<sup>36</sup> with the 1000 Genomes Project  
272 Phase III as the reference panel.

273

### 274 **3. Description of Studies included in the Sequenom replication**

#### 275 **Korea Genome Epidemiology Study (KoGES):**

276 The KoGES is ongoing study since 2001 to investigate major genetic and environmental  
277 factors for common diseases in the Korean population.<sup>32</sup> Total 1,536 women with  
278 sufficient DNA concentrations were analyzed among 10,038 subjects surveyed at  
279 baseline enrollment in 2001. Of 7,861 subjects recruited from 2005 to 2006, 1,673  
280 women were analyzed. A total of 3,209 control subjects were selected and analyzed.

#### 281 **Korean Hereditary Breast Cancer (KOHBRA):**

282 The KOHBRA study<sup>22</sup> as described earlier has contributed samples to both the BCAC  
283 OncoArray project and the replication stage of current study.

#### 284 **Korean National Cancer Cohort (KNCC)**

285 Korea NCC study: Newly diagnosed breast cancer patients (cases, n=505) were  
286 recruited from the Breast Cancer Clinic at the Asan Medical Center in Seoul, Korea  
287 between February 2006 and July 2010.<sup>37</sup> Each case member had received a  
288 histologically confirmed diagnosis of their first primary breast cancer and participated in  
289 the study before the treatment was started. Ineligibility criteria were a previous  
290 malignancy (at either the same site or a different site) and an age greater than 80 years.  
291 The hospital controls (n=505) were women free of any malignant neoplasms and free of  
292 any clinical, biochemical, or hematological manifestations of cardiovascular, hepatic,

293 renal, or endocrinal disorders. All case and control subjects completed a questionnaire  
294 on lifestyle and dietary intake and provided blood samples. Informed consent was  
295 obtained from all subjects after a full explanation of the study, which had been  
296 previously approved by the institutional review board of the Korea National Cancer  
297 Center. Both case and control subjects were interviewed by one trained interviewer who  
298 was unaware of the subject's status. Using both a non-dietary questionnaire and a 95-  
299 item semi-quantitative food frequency questionnaire, information was collected on  
300 socio-demographic characteristics, anthropometric measures, individual medical history,  
301 family cancer history, and dietary factors detailing their usual food intake over the year  
302 prior to enrolment in the study. Socio-demographic characteristics included education  
303 level, occupation, cigarette smoking status, alcohol consumption, and physical activity.  
304 Pathological and laboratory data for each subject were collected, recorded, and entered  
305 into an epidemiological database. Medical charts and pathology reports were examined  
306 to ensure that control subjects had no known history of cancer. A peripheral venous  
307 blood sample (20 ml aliquot in an anticoagulant tube) was obtained from each enrolled  
308 subject. Laboratory assays of the blood samples were performed before the initiation of  
309 any treatment or therapy. Blood samples were wrapped in aluminum foil to protect  
310 against photo-oxidation, and transported to the laboratory without revealing the  
311 subject's case/control status prior to performing the antioxidant micronutrient assay.  
312 After separating plasma, samples were stored at -80°C until assayed.

### 313 **Hong Kong Study:**

314 This is a hospital-based case-control study conducted in Hong Kong, China.<sup>38</sup> Incident  
315 breast cancer cases were recruited during the period of 2003 to 2011 from three major



316 public hospitals, i.e. Queen Mary Hospital, Queen Elisabeth Hospital, and Kwong Wah  
317 Hospital. Control participants free of cancer history were recruited from the outpatients  
318 who attended the general gynaecological clinic at Queen Mary Hospital and from the  
319 Well-Women Clinic at Kwong Wah Hospital. Institutional Review Board Approval was  
320 obtained from the University of Hong Kong Hospital Authority. Consent was obtained  
321 from all the study participants for blood collection. Data of 476 cases and 278 controls  
322 were analyzed in the current study.

323 **Taiwanese Breast Cancer Study (TWBCS):**

324 The description of study participants of TWBCS<sup>32,33</sup> can be found above.

325 **Nagoya Study (Hospital-based Epidemiologic Research Program at Aichi Cancer**  
326 **Center, HERPACC-II):**

327 The HERPACC-II study is a hospital-based, comprehensive epidemiologic research  
328 program at the Aichi Cancer Center (ACC), Japan.<sup>39</sup> All first-visit outpatients 20-79  
329 years of age at the ACC from December 2000 to November 2005 were asked to  
330 participate in this study. A total of 29,736 eligible patients were approached, and 28,766  
331 participated in the study, with a response rate of 96.7%. Subjects completed a self-  
332 administered questionnaire about their lifestyle and demographic characteristics and to  
333 provide blood samples. Dietary habits were investigated using a 47-item semi-  
334 quantitative food frequency questionnaire. For cases, ER status was retrieved from  
335 medical records. ER status is routinely determined by pathologists by using  
336 commercially based immunohistochemistry tests at the ACC. Case status was  
337 confirmed by linkage of the HERPACC-II database and the hospital-based cancer  
338 registry database. A total of 1,850 histologically-confirmed breast cancer cases were

339 identified, and 644 were selected for the Asia Breast Cancer Consortium analysis based  
340 on availability of DNA samples. Among 14,260 non-cancer subjects in the HEPACC-II  
341 database, 644 subjects matched for age and menopausal status were randomly  
342 selected. The study protocol was approved by the Institutional Review Board at the  
343 ACC (Nagoya, Japan).

344 **Nagano Breast Cancer Study (NGOBCS):**

345 The description of study participants of NGOBCS<sup>29,30</sup> can be found above.

346

347

348

349

350

351

352

353

354

355

356

357

358

359 **Supplementary Note 2.**

360 *Expression quantitative loci (eQTL) analysis*

361 To identify robust eQTL across racial groups and different types of breast tissues, we  
362 utilized several independent sets of whole transcriptome RNA sequencing or RNA  
363 microarray and genotyping data derived from normal breast, breast tumor and adjacent  
364 normal tissues. The data of normal breast tissue were obtained from the GTEx (version  
365 7, N = 85, women of European ancestry). We focused on *cis*-eQTL analyses for genes  
366 residing  $\pm 500$  Kb of each newly associated lead SNP. Study subjects included in the  
367 GTEx were genotyped using the Illumina OMNI 5M or 2.5M SNP Array. We excluded  
368 variants with a genotyping call rate  $< 98\%$ , with differential missingness between Omni  
369 2.5M and Omni 5M arrays, with a Hardy-Weinberg equilibrium  $P < 10^{-6}$  (for subjects of  
370 European ancestry). Genotype data were imputed to the Haplotype Reference  
371 Consortium reference panel using minimac3 for imputation and SHAPEIT for  
372 prephasing. Variants with high imputation quality ( $R^2 \geq 0.8$ ), with a MAF  $\geq 0.05$  were  
373 analyzed. The kilobase per million (RPKM) values of each gene from RNA-seq were  
374 log2 transformed. We removed genes with a median of 0 reads per RPKM units cross  
375 samples from the eQTL analysis. We first performed quantile normalization to ensure  
376 that the expression profile of each sample was comparable on the same scale. We then  
377 performed inverse quantile normalization for each gene to transform its expression  
378 distribution to a standard normal. To account for batch effects and experimental  
379 confounders, we followed probabilistic estimation of expression residual (PEER)  
380 protocol to generate the top 15 PEER factors and residuals<sup>40</sup>. We included the top ten

381 principal components derived from genotype data in the PEER procedure. Residuals  
382 were modeled in the downstream eQTL analysis.

383         At Vanderbilt, we also generated whole transcriptome RNA sequencing data  
384 (Illumina HiSeq) using adjacent normal breast tissues obtained from 200 subjects  
385 diagnosed with benign breast diseases or breast cancer (all women of East Asian  
386 ancestry). Of these, 151 subjects had genome-wide genotyping data available for eQTL  
387 analysis. We followed our previously developed pipeline to process the raw RNA-seq  
388 reads<sup>41</sup>. All sequencing reads were mapped to the human genome (hg19) using the  
389 Bowtie2 tool<sup>42</sup>. The mapped RNA-seq reads were then used to compute expression  
390 values for all coding genes and noncoding RNAs by Cufflinks (version 2.2.1)<sup>43</sup>. The  
391 most recent Gencode (release 27) was used for annotating coding genes and  
392 noncoding RNAs<sup>44</sup>. We derived fragments per kilobase of transcript per million mapped  
393 reads (FPKM) for expression levels of coding genes and lncRNAs. We performed  
394 multiple processing steps by filtering lowly-expressed genes (median FPKM = 0), log<sub>2</sub>  
395 transforming, and performing rank-based inverse normalization to transform gene  
396 expression values across samples. We additionally performed a PEER analysis to  
397 generate the top 30 PEER factors for the adjustment of batch and other potential  
398 confounding factors. Residuals from the PEER analysis were used for the downstream  
399 eQTL analysis.

400         We obtained genotyping and RNA-seq/microarray data measured on breast  
401 tumor tissues from the Cancer Genome Atlas project (TCGA, N<sub>tumor</sub> = 672) and the  
402 Molecular Taxonomy of Breast Cancer International Consortium (METABRIC, N<sub>tumor</sub> =  
403 1,904) project. For TCGA samples, gene expression had been measured on the

404 Illumina HiSeq 2000 RNA-Seq platform (gene-level RSEM normalized counts). Similar  
405 bioinformatics processes were conducted, as described above, including the removal of  
406 lowly-expressed genes, log<sub>2</sub> transformation, and rank-based inverse normalization.  
407 Copy-number estimates were derived from the Affymetrix SNP 6.0 using the GISTIC2  
408 algorithm<sup>45</sup>, and methylation beta values were measured on the Illumina Infinium  
409 HumanMethylation450. Germline genotyping for the METABRIC study was done on the  
410 Affymetrix SNP 6.0 array, and gene expression in the METABRIC study was measured  
411 using the Illumina HT12 microarray platform (probe-level estimates).

412         A linear regression model was used to perform an eQTL analysis to estimate the  
413 additive effect of genetic variants on gene expression levels. We additionally adjusted  
414 for copy number alteration and methylation levels in the model for TCGA data. We only  
415 adjusted for copy number alteration in the analysis for the METABRIC set.

416  
417  
418  
419  
420  
421  
422  
423  
424  
425  
426  
427  
428  
429  
430  
431  
432  
433  
434  
435  
436

- 438 1. Zheng, W. *et al.* Genome-wide association study identifies a new breast cancer  
439 susceptibility locus at 6q25.1. *Nat Genet* **41**, 324-8 (2009).
- 440 2. Gao, Y.T. *et al.* Association of menstrual and reproductive factors with breast cancer  
441 risk: results from the Shanghai Breast Cancer Study. *Int J Cancer* **87**, 295-300 (2000).
- 442 3. Lum, A. & Le Marchand, L. A simple mouthwash method for obtaining genomic DNA in  
443 molecular epidemiological studies. *Cancer Epidemiol Biomarkers Prev* **7**, 719-24 (1998).
- 444 4. Zheng, W. *et al.* The Shanghai Women's Health Study: rationale, study design, and  
445 baseline characteristics. *Am J Epidemiol* **162**, 1123-31 (2005).
- 446 5. Zhang, Y. *et al.* Rare coding variants and breast cancer risk: evaluation of susceptibility  
447 Loci identified in genome-wide association studies. *Cancer Epidemiol Biomarkers Prev*  
448 **23**, 622-8 (2014).
- 449 6. Song, H.R. *et al.* Sex-specific differences in the association between ABO genotype and  
450 gastric cancer risk in a Korean population. *Gastric Cancer* **16**, 254-60 (2013).
- 451 7. Shim, H.J., Lee, R., Shin, M.H., Kim, H.N. & Kweon, S.S. Association between the  
452 TCF7L2 polymorphism and colorectal cancer does not differ by diabetes and obesity  
453 statuses. *Cancer Epidemiol* **45**, 108-111 (2016).
- 454 8. Kweon, S.S. *et al.* Cohort Profile: The Namwon Study and the Dong-gu Study. *Int J*  
455 *Epidemiol* **43**, 558-67 (2014).
- 456 9. Cho, Y.S. *et al.* A large-scale genome-wide association study of Asian populations  
457 uncovers genetic factors influencing eight quantitative traits. *Nat Genet* **41**, 527-34  
458 (2009).
- 459 10. Han, S. *et al.* CASP8 polymorphisms, estrogen and progesterone receptor status, and  
460 breast cancer risk. *Breast Cancer Res Treat* **110**, 387-93 (2008).
- 461 11. Han, M.R. *et al.* Genome-wide association study in East Asians identifies two novel  
462 breast cancer susceptibility loci. *Hum Mol Genet* **25**, 3361-3371 (2016).
- 463 12. Elgazzar, S. *et al.* A genome-wide association study identifies a genetic variant in the  
464 SIAH2 locus associated with hormonal receptor-positive breast cancer in Japanese. *J*  
465 *Hum Genet* **57**, 766-71 (2012).
- 466 13. Low, S.K. *et al.* Genome-wide association study of breast cancer in the Japanese  
467 population. *PLoS One* **8**, e76463 (2013).
- 468 14. Grundy, A. *et al.* Shift work, circadian gene variants and risk of breast cancer. *Cancer*  
469 *Epidemiol* **37**, 606-12 (2013).
- 470 15. Kobayashi, L.C. *et al.* Moderate-to-vigorous intensity physical activity across the life  
471 course and risk of pre- and post-menopausal breast cancer. *Breast Cancer Res Treat* **139**,  
472 851-61 (2013).
- 473 16. Grundy, A. *et al.* Increased risk of breast cancer associated with long-term shift work in  
474 Canada. *Occup Environ Med* **70**, 831-8 (2013).
- 475 17. Kobayashi, L.C. *et al.* A case-control study of lifetime light intensity physical activity  
476 and breast cancer risk. *Cancer Causes Control* **25**, 133-40 (2014).
- 477 18. Kawase, T. *et al.* FGFR2 intronic polymorphisms interact with reproductive risk factors  
478 of breast cancer: results of a case control study in Japan. *Int J Cancer* **125**, 1946-52  
479 (2009).
- 480 19. Kwong, A. *et al.* Novel BRCA1 and BRCA2 genomic rearrangements in Southern  
481 Chinese breast/ovarian cancer patients. *Breast Cancer Res Treat* **136**, 931-3 (2012).

- 482 20. Kwong, A. *et al.* Identification of BRCA1/2 founder mutations in Southern Chinese  
483 breast cancer patients using gene sequencing and high resolution DNA melting analysis.  
484 *PLoS One* **7**, e43994 (2012).
- 485 21. Kwong, A. *et al.* Detection of Germline Mutation in Hereditary Breast and/or Ovarian  
486 Cancers by Next-Generation Sequencing on a Four-Gene Panel. *J Mol Diagn* **18**, 580-94  
487 (2016).
- 488 22. Han, S.A. *et al.* The Korean Hereditary Breast Cancer (KOHBRA) study: protocols and  
489 interim report. *Clin Oncol (R Coll Radiol)* **23**, 434-41 (2011).
- 490 23. Wu, A.H., Yu, M.C., Tseng, C.C., Stanczyk, F.Z. & Pike, M.C. Dietary patterns and  
491 breast cancer risk in Asian American women. *Am J Clin Nutr* **89**, 1145-54 (2009).
- 492 24. Wu, A.H., McKean-Cowdin, R. & Tseng, C.C. Birth weight and other prenatal factors  
493 and risk of breast cancer in Asian-Americans. *Breast Cancer Res Treat* **130**, 917-25  
494 (2011).
- 495 25. Wu, A.H., Vigen, C., Butler, L.M. & Tseng, C.C. Metabolic conditions and breast cancer  
496 risk among Los Angeles County Filipina Americans compared with Chinese and  
497 Japanese Americans. *Int J Cancer* **141**, 2450-2461 (2017).
- 498 26. Phuah, S.Y. *et al.* Triple-negative breast cancer and PTEN (phosphatase and tensin  
499 homologue) loss are predictors of BRCA1 germline mutations in women with early-onset  
500 and familial breast cancer, but not in women with isolated late-onset breast cancer. *Breast  
501 Cancer Res* **14**, R142 (2012).
- 502 27. John, E.M. *et al.* The Breast Cancer Family Registry: an infrastructure for cooperative  
503 multinational, interdisciplinary and translational studies of the genetic epidemiology of  
504 breast cancer. *Breast Cancer Res* **6**, R375-89 (2004).
- 505 28. Terry, M.B. *et al.* Cohort Profile: The Breast Cancer Prospective Family Study Cohort  
506 (ProF-SC). *Int J Epidemiol* **45**, 683-92 (2016).
- 507 29. Itoh, H. *et al.* Serum organochlorines and breast cancer risk in Japanese women: a case-  
508 control study. *Cancer Causes Control* **20**, 567-80 (2009).
- 509 30. Shimada, N. *et al.* Genetic polymorphisms in estrogen metabolism and breast cancer risk  
510 in case-control studies in Japanese, Japanese Brazilians and non-Japanese Brazilians. *J  
511 Hum Genet* **54**, 209-15 (2009).
- 512 31. Tan, K.H.X. *et al.* Cohort Profile: The Singapore Multi-Ethnic Cohort (MEC) study. *Int J  
513 Epidemiol* (2018).
- 514 32. Hsu, H.M. *et al.* Breast cancer risk is associated with the genes encoding the DNA  
515 double-strand break repair Mre11/Rad50/Nbs1 complex. *Cancer Epidemiol Biomarkers  
516 Prev* **16**, 2024-32 (2007).
- 517 33. Ding, S.L. *et al.* Genetic variants of BLM interact with RAD51 to increase breast cancer  
518 susceptibility. *Carcinogenesis* **30**, 43-9 (2009).
- 519 34. Michailidou, K. *et al.* Association analysis identifies 65 new breast cancer risk loci.  
520 *Nature* **551**, 92-94 (2017).
- 521 35. Michailidou, K. *et al.* Large-scale genotyping identifies 41 new loci associated with  
522 breast cancer risk. *Nat Genet* **45**, 353-61, 361e1-2 (2013).
- 523 36. Howie, B.N., Donnelly, P. & Marchini, J. A flexible and accurate genotype imputation  
524 method for the next generation of genome-wide association studies. *PLoS Genet* **5**,  
525 e1000529 (2009).
- 526 37. Long, J. *et al.* Genome-wide association study in east Asians identifies novel  
527 susceptibility loci for breast cancer. *PLoS Genet* **8**, e1002532 (2012).

- 528 38. Chan, K.Y. *et al.* Functional polymorphisms in the BRCA1 promoter influence  
529 transcription and are associated with decreased risk for breast cancer in Chinese women.  
530 *J Med Genet* **46**, 32-9 (2009).
- 531 39. Hamajima, N. *et al.* Gene-environment Interactions and Polymorphism Studies of Cancer  
532 Risk in the Hospital-based Epidemiologic Research Program at Aichi Cancer Center II  
533 (HERPACC-II). *Asian Pac J Cancer Prev* **2**, 99-107 (2001).
- 534 40. Stegle, O., Parts, L., Piipari, M., Winn, J. & Durbin, R. Using probabilistic estimation of  
535 expression residuals (PEER) to obtain increased power and interpretability of gene  
536 expression analyses. *Nat Protoc* **7**, 500-7 (2012).
- 537 41. Guo, X., Lin, M., Rockowitz, S., Lachman, H.M. & Zheng, D. Characterization of human  
538 pseudogene-derived non-coding RNAs for functional potential. *PLoS One* **9**, e93972  
539 (2014).
- 540 42. Langmead, B. & Salzberg, S.L. Fast gapped-read alignment with Bowtie 2. *Nat Methods*  
541 **9**, 357-9 (2012).
- 542 43. Trapnell, C. *et al.* Differential gene and transcript expression analysis of RNA-seq  
543 experiments with TopHat and Cufflinks. *Nat Protoc* **7**, 562-78 (2012).
- 544 44. Harrow, J. *et al.* GENCODE: the reference human genome annotation for The ENCODE  
545 Project. *Genome Res* **22**, 1760-74 (2012).
- 546 45. Mermel, C.H. *et al.* GISTIC2.0 facilitates sensitive and confident localization of the  
547 targets of focal somatic copy-number alteration in human cancers. *Genome Biol* **12**, R41  
548 (2011).  
549
