# Supplementary material for: Identification of novel breast cancer susceptibility loci in meta-analyses conducted among Asian and European descendants
Source: PubMed Central journal article supplement (PMC7057957; doi:10.1038/s41467-020-15046-w), 2020-03-05
Supplement: 41467_2020_15046_MOESM3_ESM.pdf [file 41467_2020_15046_MOESM3_ESM.pdf]

## Description of Additional Supplementary files

File name: Supplementary Data 1

Description: Association results of 28 loci in each Asian study

File Name: Supplementary Data 2

Description: Association results of 28 loci in each dataset of BCAC Europeans

File Name: Supplementary Data 3

Description: Regulatory functional annotation of SNPs in high LD ( $r^2 > 0.8$ ) with newly associated SNPs in Asian populations using Haploreg

File Name: Supplementary Data 4

Description: Regulatory functional annotation of SNPs in high LD ( $r^2 > 0.8$ ) with newly-associated SNPs in European populations using Haploreg

File Name: Supplementary Data 5

Description: Replication of breast cancer susceptibility SNPs previously reported

File name: Supplementary Data 6

Description: Independent secondary associations found within previously known loci: A conditional analysis
