# Supplementary material for: Identification of novel breast cancer susceptibility loci in meta-analyses conducted among Asian and European descendants
Source: PubMed Central journal article supplement (PMC7057957; doi:10.1038/s41467-020-15046-w), 2020-03-05
Supplement: 41467_2020_15046_MOESM4_ESM.pdf [file 41467_2020_15046_MOESM4_ESM.pdf]

**Supplementary Data 1. Association results of 28 loci in each Asian study**

| SNP        | Chr | BP          | Test | Other            | Dataset              | EAF  | OR (95% CI)      | P                     | Imputation R <sup>2</sup> | I <sup>2</sup> , % | P <sub>heterogeneity</sub> |
|------------|-----|-------------|------|------------------|----------------------|------|------------------|-----------------------|---------------------------|--------------------|----------------------------|
| rs72906468 | 1   | 17772093    | A    | T                | BCAC Asian iCOGs     | 0.69 | 1.03 (0.97-1.10) | 0.381                 | 0.88                      | 0                  | 0.708                      |
|            |     |             | A    | T                | BCAC Asian OncoArray | 0.69 | 1.06 (1.00-1.11) | 0.045                 | 0.94                      |                    |                            |
|            |     |             | A    | T                | Japanese GWAS        | 0.68 | 1.06 (0.97-1.16) | 0.196                 | 0.91                      |                    |                            |
|            |     |             | A    | T                | Korean GWAS          | 0.70 | 1.16 (1.05-1.29) | 0.005                 | 0.81                      |                    |                            |
|            |     |             | A    | T                | MEGA HCES-1          | 0.72 | 0.96 (0.71-1.29) | 0.774                 | 0.89                      |                    |                            |
|            |     |             | A    | T                | MEGA KPOP-BRCA       | 0.71 | 1.10 (0.94-1.28) | 0.220                 | 0.89                      |                    |                            |
|            |     |             | A    | T                | MEGA SH              | 0.67 | 1.07 (0.97-1.19) | 0.174                 | 0.89                      |                    |                            |
|            |     |             | A    | T                | Shanghai BC GWAS     | 0.67 | 1.05 (0.96-1.16) | 0.276                 | 0.84                      |                    |                            |
| rs3790585  | 1   | 46023356    | A    | T                | Asian ExomeChip      | 0.77 | 0.93 (0.81-1.07) | 0.303                 | 0.58                      | 15.2%              | 0.307                      |
|            |     |             | A    | T                | BCAC Asian iCOGs     | 0.68 | 1.09 (1.02-1.15) | 0.007                 | 1.00                      |                    |                            |
|            |     |             | A    | T                | BCAC Asian OncoArray | 0.68 | 1.01 (0.96-1.06) | 0.799                 | 1.00                      |                    |                            |
|            |     |             | A    | T                | Japanese GWAS        | 0.70 | 1.06 (0.97-1.16) | 0.172                 | 0.99                      |                    |                            |
|            |     |             | A    | T                | Korean GWAS          | 0.75 | 1.12 (1.01-1.24) | 0.031                 | 0.97                      |                    |                            |
|            |     |             | A    | T                | MEGA HCES-1          | 0.71 | 1.20 (0.90-1.58) | 0.209                 | 0.99                      |                    |                            |
|            |     |             | A    | T                | MEGA KPOP-BRCA       | 0.73 | 1.02 (0.89-1.18) | 0.739                 | 0.99                      |                    |                            |
|            |     |             | A    | T                | MEGA SH              | 0.67 | 1.05 (0.95-1.15) | 0.357                 | 0.99                      |                    |                            |
| rs2758598  | 1   | 156194339   | A    | G                | Asian ExomeChip      | 0.20 | 1.02 (0.89-1.18) | 0.760                 | 0.64                      | 54.2%              | 0.025                      |
|            |     |             | A    | G                | BCAC Asian iCOGs     | 0.16 | 1.01 (0.94-1.09) | 0.783                 | 0.99                      |                    |                            |
|            |     |             | A    | G                | BCAC Asian OncoArray | 0.16 | 1.12 (1.05-1.20) | 4.83×10 <sup>-4</sup> | 1.00                      |                    |                            |
|            |     |             | A    | G                | Japanese GWAS        | 0.17 | 1.15 (1.03-1.28) | 0.014                 | 0.99                      |                    |                            |
|            |     |             | A    | G                | Korean GWAS          | 0.06 | 1.29 (0.97-1.71) | 0.082                 | 0.41                      |                    |                            |
|            |     |             | A    | G                | MEGA HCES-1          | 0.14 | 1.11 (0.78-1.58) | 0.567                 | 0.98                      |                    |                            |
|            |     |             | A    | G                | MEGA KPOP-BRCA       | 0.15 | 1.33 (1.11-1.60) | 0.002                 | 0.98                      |                    |                            |
|            |     |             | A    | G                | MEGA SH              | 0.16 | 1.00 (0.88-1.13) | 1.000                 | 0.98                      |                    |                            |
| rs6756513  | 2   | 70172587    | A    | G                | Shanghai BC GWAS     | 0.16 | 0.97 (0.86-1.09) | 0.561                 | 0.90                      |                    |                            |
|            |     |             | A    | G                | Asian ExomeChip      | 0.28 | 0.94 (0.84-1.06) | 0.325                 | 0.81                      | 0                  | 0.711                      |
|            |     |             | A    | G                | BCAC Asian iCOGs     | 0.30 | 0.96 (0.90-1.03) | 0.303                 | 0.79                      |                    |                            |
|            |     |             | A    | G                | BCAC Asian OncoArray | 0.29 | 0.96 (0.91-1.01) | 0.137                 | 0.95                      |                    |                            |
|            |     |             | A    | G                | Japanese GWAS        | 0.36 | 0.95 (0.88-1.04) | 0.271                 | 1.00                      |                    |                            |
| A          | G   | Korean GWAS | 0.32 | 0.95 (0.87-1.05) | 0.322                | 1.00 |                  |                       |                           |                    |                            |

|            |   |           |   |         |                      |      |                  |                       |      |       |       |
|------------|---|-----------|---|---------|----------------------|------|------------------|-----------------------|------|-------|-------|
| rs73006998 | 3 | 150464271 | A | G       | MEGA HCES-1          | 0.33 | 1.07 (0.82-1.40) | 0.599                 | 0.97 | 4.6%  | 0.394 |
|            |   |           | A | G       | MEGA KPOP-BRCA       | 0.32 | 0.95 (0.83-1.10) | 0.492                 | 0.97 |       |       |
|            |   |           | A | G       | MEGA SH              | 0.26 | 1.07 (0.96-1.18) | 0.229                 | 0.97 |       |       |
|            |   |           | A | G       | Shanghai BC GWAS     | 0.27 | 0.92 (0.84-1.01) | 0.082                 | 0.99 |       |       |
|            |   |           | A | G       | BCAC Asian iCOGs     | 0.30 | 0.97 (0.91-1.04) | 0.415                 | 0.86 |       |       |
|            |   |           | A | G       | BCAC Asian OncoArray | 0.32 | 0.89 (0.85-0.94) | 1.84×10 <sup>-5</sup> | 0.99 |       |       |
|            |   |           | A | G       | Japanese GWAS        | 0.31 | 0.90 (0.83-0.99) | 0.024                 | 1.00 |       |       |
|            |   |           | A | G       | Korean GWAS          | 0.36 | 0.97 (0.88-1.06) | 0.484                 | 0.99 |       |       |
|            |   |           | A | G       | MEGA HCES-1          | 0.39 | 0.88 (0.68-1.12) | 0.295                 | 1.00 |       |       |
|            |   |           | A | G       | MEGA KPOP-BRCA       | 0.36 | 0.90 (0.79-1.03) | 0.114                 | 1.00 |       |       |
| rs11281251 | 3 | 156519412 | A | G       | MEGA SH              | 0.35 | 0.90 (0.82-0.99) | 0.033                 | 1.00 | 15.4% | 0.315 |
|            |   |           | A | G       | Shanghai BC GWAS     | 0.33 | 0.87 (0.79-0.95) | 0.001                 | 0.98 |       |       |
|            |   |           | T | TTGTGAC | BCAC Asian iCOGs     | 0.19 | 0.97 (0.90-1.04) | 0.372                 | 0.99 |       |       |
|            |   |           | T | TTGTGAC | BCAC Asian OncoArray | 0.17 | 0.90 (0.85-0.96) | 0.001                 | 0.99 |       |       |
|            |   |           | T | TTGTGAC | MEGA HCES-1          | 0.20 | 1.13 (0.82-1.55) | 0.464                 | 0.96 |       |       |
|            |   |           | T | TTGTGAC | MEGA KPOP-BRCA       | 0.21 | 1.02 (0.87-1.20) | 0.831                 | 0.96 |       |       |
|            |   |           | T | TTGTGAC | MEGA SH              | 0.17 | 0.89 (0.79-1.01) | 0.061                 | 0.96 |       |       |
| rs11944638 | 4 | 48227719  | T | TTGTGAC | Shanghai BC GWAS     | 0.17 | 0.98 (0.88-1.10) | 0.762                 | 0.98 | 0     | 0.898 |
|            |   |           | T | C       | Asian ExomeChip      | 0.81 | 1.16 (0.96-1.39) | 0.119                 | 0.41 |       |       |
|            |   |           | T | C       | BCAC Asian iCOGs     | 0.76 | 1.09 (1.01-1.17) | 0.022                 | 0.87 |       |       |
|            |   |           | T | C       | BCAC Asian OncoArray | 0.77 | 1.05 (0.99-1.11) | 0.111                 | 0.97 |       |       |
|            |   |           | T | C       | Japanese GWAS        | 0.68 | 1.06 (0.97-1.16) | 0.183                 | 0.97 |       |       |
|            |   |           | T | C       | Korean GWAS          | 0.67 | 1.08 (0.98-1.19) | 0.133                 | 0.94 |       |       |
|            |   |           | T | C       | MEGA HCES-1          | 0.65 | 1.16 (0.89-1.49) | 0.273                 | 0.97 |       |       |
|            |   |           | T | C       | MEGA KPOP-BRCA       | 0.67 | 1.14 (1.00-1.31) | 0.056                 | 0.97 |       |       |
|            |   |           | T | C       | MEGA SH              | 0.76 | 1.04 (0.93-1.15) | 0.518                 | 0.97 |       |       |
|            |   |           | T | C       | Shanghai BC GWAS     | 0.75 | 1.11 (1.01-1.22) | 0.034                 | 0.92 |       |       |
| rs11947923 | 4 | 53911337  | T | C       | BCAC Asian iCOGs     | 0.28 | 0.96 (0.90-1.02) | 0.174                 | 0.91 | 0     | 0.687 |
|            |   |           | T | C       | BCAC Asian OncoArray | 0.29 | 0.99 (0.93-1.04) | 0.597                 | 0.90 |       |       |
|            |   |           | T | C       | Japanese GWAS        | 0.26 | 0.96 (0.88-1.05) | 0.403                 | 0.98 |       |       |
|            |   |           | T | C       | Korean GWAS          | 0.29 | 0.97 (0.88-1.08) | 0.601                 | 0.89 |       |       |
|            |   |           | T | C       | MEGA HCES-1          | 0.27 | 0.73 (0.54-1.00) | 0.053                 | 0.79 |       |       |
|            |   |           | T | C       | MEGA KPOP-BRCA       | 0.29 | 0.99 (0.85-1.17) | 0.943                 | 0.79 |       |       |
|            |   |           | T | C       | MEGA SH              | 0.29 | 0.94 (0.84-1.05) | 0.261                 | 0.79 |       |       |

|           |   |           |   |   |                      |      |                  |       |      |   |       |
|-----------|---|-----------|---|---|----------------------|------|------------------|-------|------|---|-------|
| rs6555134 | 5 | 2776483   | T | C | Shanghai BC GWAS     | 0.29 | 0.92 (0.84-1.01) | 0.094 | 0.92 | 0 | 0.806 |
|           |   |           | T | C | BCAC Asian iCOGs     | 0.26 | 0.97 (0.91-1.04) | 0.382 | 0.97 |   |       |
|           |   |           | T | C | BCAC Asian OncoArray | 0.25 | 0.95 (0.90-1.00) | 0.057 | 0.97 |   |       |
|           |   |           | T | C | Japanese GWAS        | 0.26 | 1.00 (0.91-1.09) | 0.946 | 0.98 |   |       |
|           |   |           | T | C | Korean GWAS          | 0.29 | 0.96 (0.87-1.06) | 0.434 | 0.97 |   |       |
|           |   |           | T | C | MEGA HCES-1          | 0.27 | 0.91 (0.69-1.20) | 0.502 | 0.99 |   |       |
|           |   |           | T | C | MEGA KPOP-BRCA       | 0.29 | 0.88 (0.77-1.02) | 0.081 | 0.99 |   |       |
|           |   |           | T | C | MEGA SH              | 0.25 | 0.94 (0.85-1.05) | 0.264 | 0.99 |   |       |
|           |   |           | T | C | Shanghai BC GWAS     | 0.24 | 0.90 (0.82-1.00) | 0.042 | 0.94 |   |       |
| rs7765429 | 6 | 21904169  | T | C | BCAC Asian iCOGs     | 0.88 | 0.97 (0.89-1.06) | 0.447 | 1.00 | 0 | 0.444 |
|           |   |           | T | C | BCAC Asian OncoArray | 0.88 | 0.93 (0.87-1.01) | 0.075 | 1.00 |   |       |
|           |   |           | T | C | Japanese GWAS        | 0.95 | 0.96 (0.80-1.16) | 0.675 | 1.00 |   |       |
|           |   |           | T | C | Korean GWAS          | 0.92 | 0.87 (0.73-1.03) | 0.112 | 0.89 |   |       |
|           |   |           | T | C | MEGA HCES-1          | 0.92 | 0.87 (0.54-1.40) | 0.558 | 0.99 |   |       |
|           |   |           | T | C | MEGA KPOP-BRCA       | 0.92 | 1.22 (0.95-1.56) | 0.118 | 0.99 |   |       |
|           |   |           | T | C | MEGA SH              | 0.91 | 0.91 (0.78-1.06) | 0.231 | 0.99 |   |       |
|           |   |           | T | C | Shanghai BC GWAS     | 0.91 | 0.87 (0.75-1.01) | 0.060 | 0.92 |   |       |
|           |   |           | T | C | Asian ExomeChip      | 0.35 | 0.87 (0.75-1.02) | 0.084 | 0.37 |   |       |
| rs7768862 | 6 | 85088846  | A | T | BCAC Asian iCOGs     | 0.29 | 0.95 (0.90-1.02) | 0.141 | 0.98 | 0 | 0.745 |
|           |   |           | A | T | BCAC Asian OncoArray | 0.29 | 0.93 (0.88-0.98) | 0.006 | 1.00 |   |       |
|           |   |           | A | T | Japanese GWAS        | 0.29 | 1.02 (0.93-1.11) | 0.698 | 1.00 |   |       |
|           |   |           | A | T | Korean GWAS          | 0.28 | 0.96 (0.87-1.06) | 0.397 | 0.99 |   |       |
|           |   |           | A | T | MEGA HCES-1          | 0.29 | 0.85 (0.64-1.13) | 0.252 | 0.93 |   |       |
|           |   |           | A | T | MEGA KPOP-BRCA       | 0.28 | 0.92 (0.79-1.06) | 0.246 | 0.93 |   |       |
|           |   |           | A | T | MEGA SH              | 0.29 | 0.95 (0.86-1.06) | 0.376 | 0.93 |   |       |
|           |   |           | A | T | Shanghai BC GWAS     | 0.29 | 0.93 (0.85-1.02) | 0.142 | 0.98 |   |       |
|           |   |           | A | T | Asian ExomeChip      | 0.35 | 0.87 (0.75-1.02) | 0.084 | 0.37 |   |       |
| rs6940159 | 6 | 170332621 | T | C | BCAC Asian iCOGs     | 0.82 | 0.97 (0.90-1.04) | 0.412 | 0.95 | 0 | 0.526 |
|           |   |           | T | C | BCAC Asian OncoArray | 0.83 | 0.96 (0.90-1.03) | 0.249 | 0.96 |   |       |
|           |   |           | T | C | Japanese GWAS        | 0.81 | 0.86 (0.78-0.96) | 0.006 | 1.00 |   |       |
|           |   |           | T | C | Korean GWAS          | 0.82 | 0.88 (0.78-0.99) | 0.037 | 0.91 |   |       |
|           |   |           | T | C | MEGA HCES-1          | 0.82 | 0.96 (0.70-1.32) | 0.796 | 1.00 |   |       |
|           |   |           | T | C | MEGA KPOP-BRCA       | 0.83 | 1.02 (0.86-1.20) | 0.849 | 1.00 |   |       |
|           |   |           | T | C | MEGA SH              | 0.82 | 0.91 (0.81-1.03) | 0.124 | 1.00 |   |       |
|           |   |           | T | C | Shanghai BC GWAS     | 0.82 | 0.93 (0.83-1.03) | 0.158 | 0.97 |   |       |
|           |   |           | T | C | Asian ExomeChip      | 0.35 | 0.87 (0.75-1.02) | 0.084 | 0.37 |   |       |

|             |   |           |    |   |                      |      |                  |                       |      |       |       |
|-------------|---|-----------|----|---|----------------------|------|------------------|-----------------------|------|-------|-------|
| rs144145984 | 8 | 23644003  | CT | C | Asian ExomeChip      | 0.47 | 0.86 (0.77-0.96) | 0.009                 | 0.66 | 0     | 0.502 |
|             |   |           | CT | C | BCAC Asian iCOGs     | 0.42 | 0.97 (0.92-1.03) | 0.382                 | 0.99 |       |       |
|             |   |           | CT | C | BCAC Asian OncoArray | 0.43 | 0.98 (0.93-1.03) | 0.377                 | 0.98 |       |       |
|             |   |           | CT | C | Japanese GWAS        | 0.44 | 1.01 (0.93-1.09) | 0.867                 | 0.97 |       |       |
|             |   |           | CT | C | Korean GWAS          | 0.41 | 0.97 (0.87-1.07) | 0.522                 | 0.91 |       |       |
|             |   |           | CT | C | MEGA HCES-1          | 0.41 | 0.89 (0.69-1.15) | 0.365                 | 0.97 |       |       |
|             |   |           | CT | C | MEGA KPOP-BRCA       | 0.39 | 0.92 (0.80-1.05) | 0.220                 | 0.97 |       |       |
|             |   |           | CT | C | MEGA SH              | 0.43 | 0.93 (0.85-1.02) | 0.142                 | 0.97 |       |       |
|             |   |           | CT | C | Shanghai BC GWAS     | 0.42 | 0.93 (0.86-1.01) | 0.101                 | 0.97 |       |       |
| rs2849506   | 8 | 101329134 | C  | G | Asian ExomeChip      | 0.50 | 0.98 (0.89-1.07) | 0.643                 | 0.94 | 0     | 0.967 |
|             |   |           | C  | G | BCAC Asian iCOGs     | 0.48 | 0.94 (0.88-0.99) | 0.025                 | 0.96 |       |       |
|             |   |           | C  | G | BCAC Asian OncoArray | 0.48 | 0.96 (0.92-1.01) | 0.111                 | 0.99 |       |       |
|             |   |           | C  | G | Japanese GWAS        | 0.51 | 0.97 (0.89-1.05) | 0.443                 | 0.95 |       |       |
|             |   |           | C  | G | Korean GWAS          | 0.40 | 0.97 (0.87-1.08) | 0.581                 | 0.81 |       |       |
|             |   |           | C  | G | MEGA HCES-1          | 0.49 | 1.10 (0.85-1.41) | 0.479                 | 0.99 |       |       |
|             |   |           | C  | G | MEGA KPOP-BRCA       | 0.48 | 0.94 (0.83-1.07) | 0.358                 | 0.99 |       |       |
|             |   |           | C  | G | MEGA SH              | 0.50 | 0.96 (0.88-1.05) | 0.414                 | 0.99 |       |       |
|             |   |           | C  | G | Shanghai BC GWAS     | 0.50 | 0.94 (0.86-1.02) | 0.112                 | 1.00 |       |       |
| rs142360995 | 8 | 118205719 | A  | G | Asian ExomeChip      | 0.14 | 1.10 (0.89-1.36) | 0.370                 | 0.39 | 47.2% | 0.056 |
|             |   |           | A  | G | BCAC Asian iCOGs     | 0.09 | 1.19 (1.06-1.33) | 0.003                 | 0.79 |       |       |
|             |   |           | A  | G | BCAC Asian OncoArray | 0.09 | 1.07 (0.98-1.16) | 0.131                 | 1.00 |       |       |
|             |   |           | A  | G | Japanese GWAS        | 0.05 | 1.00 (0.84-1.21) | 0.965                 | 0.95 |       |       |
|             |   |           | A  | G | Korean GWAS          | 0.05 | 1.19 (0.93-1.54) | 0.164                 | 0.72 |       |       |
|             |   |           | A  | G | MEGA HCES-1          | 0.09 | 0.74 (0.48-1.15) | 0.185                 | 0.99 |       |       |
|             |   |           | A  | G | MEGA KPOP-BRCA       | 0.07 | 1.57 (1.22-2.02) | 4.71×10 <sup>-4</sup> | 0.99 |       |       |
|             |   |           | A  | G | MEGA SH              | 0.10 | 1.22 (1.04-1.42) | 0.013                 | 0.99 |       |       |
|             |   |           | A  | G | Shanghai BC GWAS     | 0.09 | 1.12 (0.97-1.30) | 0.115                 | 0.98 |       |       |
| rs10820600  | 9 | 106856692 | T  | C | BCAC Asian iCOGs     | 0.80 | 0.99 (0.92-1.07) | 0.837                 | 1.00 | 34.1% | 0.156 |
|             |   |           | T  | C | BCAC Asian OncoArray | 0.81 | 0.95 (0.89-1.01) | 0.078                 | 1.00 |       |       |
|             |   |           | T  | C | Japanese GWAS        | 0.86 | 1.07 (0.95-1.20) | 0.247                 | 1.00 |       |       |
|             |   |           | T  | C | Korean GWAS          | 0.84 | 0.87 (0.77-0.98) | 0.028                 | 0.94 |       |       |
|             |   |           | T  | C | MEGA HCES-1          | 0.83 | 0.80 (0.58-1.11) | 0.182                 | 0.99 |       |       |
|             |   |           | T  | C | MEGA KPOP-BRCA       | 0.83 | 0.90 (0.76-1.06) | 0.215                 | 0.99 |       |       |
|             |   |           | T  | C | MEGA SH              | 0.82 | 0.88 (0.78-0.99) | 0.032                 | 0.99 |       |       |

|             |    |           |    |       |                      |      |                  |                       |      |       |       |
|-------------|----|-----------|----|-------|----------------------|------|------------------|-----------------------|------|-------|-------|
| rs541079479 | 10 | 22861533  | T  | C     | Shanghai BC GWAS     | 0.83 | 0.96 (0.86-1.07) | 0.469                 | 0.98 | 0     | 0.884 |
|             |    |           | CA | C     | BCAC Asian iCOGs     | 0.13 | 1.08 (0.99-1.18) | 0.067                 | 0.92 |       |       |
|             |    |           | CA | C     | BCAC Asian OncoArray | 0.13 | 1.07 (0.99-1.15) | 0.079                 | 0.90 |       |       |
|             |    |           | CA | C     | Japanese GWAS        | 0.08 | 1.10 (0.93-1.29) | 0.262                 | 0.89 |       |       |
|             |    |           | CA | C     | MEGA HCES-1          | 0.14 | 1.06 (0.72-1.56) | 0.764                 | 0.89 |       |       |
|             |    |           | CA | C     | MEGA KPOP-BRCA       | 0.12 | 0.97 (0.78-1.20) | 0.774                 | 0.89 |       |       |
|             |    |           | CA | C     | MEGA SH              | 0.15 | 1.06 (0.93-1.21) | 0.352                 | 0.89 |       |       |
|             |    |           | CA | C     | Shanghai BC GWAS     | 0.16 | 0.99 (0.88-1.12) | 0.891                 | 0.87 |       |       |
| rs2901157   | 10 | 119262365 | A  | G     | BCAC Asian iCOGs     | 0.77 | 1.06 (0.99-1.14) | 0.094                 | 0.89 | 0     | 0.998 |
|             |    |           | A  | G     | BCAC Asian OncoArray | 0.76 | 1.06 (1.00-1.12) | 0.037                 | 1.00 |       |       |
|             |    |           | A  | G     | Japanese GWAS        | 0.69 | 1.08 (0.99-1.17) | 0.094                 | 1.00 |       |       |
|             |    |           | A  | G     | Korean GWAS          | 0.71 | 1.07 (0.97-1.17) | 0.198                 | 1.00 |       |       |
|             |    |           | A  | G     | MEGA HCES-1          | 0.72 | 1.06 (0.79-1.42) | 0.695                 | 0.88 |       |       |
|             |    |           | A  | G     | MEGA KPOP-BRCA       | 0.74 | 1.05 (0.90-1.22) | 0.562                 | 0.88 |       |       |
|             |    |           | A  | G     | MEGA SH              | 0.80 | 1.01 (0.90-1.14) | 0.808                 | 0.88 |       |       |
|             |    |           | A  | G     | Shanghai BC GWAS     | 0.78 | 1.05 (0.95-1.16) | 0.318                 | 1.00 |       |       |
| rs10838267  | 11 | 44368892  | A  | G     | BCAC Asian iCOGs     | 0.32 | 1.04 (0.98-1.11) | 0.182                 | 0.99 | 0     | 0.548 |
|             |    |           | A  | G     | BCAC Asian OncoArray | 0.32 | 1.09 (1.04-1.15) | 0.000                 | 0.99 |       |       |
|             |    |           | A  | G     | Japanese GWAS        | 0.28 | 1.07 (0.98-1.17) | 0.154                 | 1.00 |       |       |
|             |    |           | A  | G     | MEGA HCES-1          | 0.32 | 1.13 (0.87-1.47) | 0.374                 | 0.97 |       |       |
|             |    |           | A  | G     | MEGA KPOP-BRCA       | 0.32 | 1.05 (0.91-1.20) | 0.520                 | 0.97 |       |       |
|             |    |           | A  | G     | MEGA SH              | 0.36 | 1.09 (0.99-1.20) | 0.071                 | 0.97 |       |       |
|             |    |           | A  | G     | Shanghai BC GWAS     | 0.37 | 0.99 (0.91-1.08) | 0.809                 | 0.99 |       |       |
|             |    |           | A  | G     | Shanghai BC GWAS     | 0.37 | 0.99 (0.91-1.08) | 0.809                 | 0.99 |       |       |
| rs78588049  | 12 | 69180907  | A  | ATTTT | BCAC Asian iCOGs     | 0.15 | 0.97 (0.90-1.05) | 0.432                 | 0.97 | 0     | 0.523 |
|             |    |           | A  | ATTTT | BCAC Asian OncoArray | 0.16 | 0.89 (0.83-0.95) | 3.85×10 <sup>-4</sup> | 0.98 |       |       |
|             |    |           | A  | ATTTT | Japanese GWAS        | 0.15 | 1.00 (0.89-1.12) | 0.956                 | 0.99 |       |       |
|             |    |           | A  | ATTTT | MEGA HCES-1          | 0.15 | 0.86 (0.59-1.24) | 0.409                 | 0.92 |       |       |
|             |    |           | A  | ATTTT | MEGA KPOP-BRCA       | 0.13 | 0.93 (0.77-1.14) | 0.501                 | 0.92 |       |       |
|             |    |           | A  | ATTTT | MEGA SH              | 0.16 | 0.91 (0.80-1.04) | 0.165                 | 0.92 |       |       |
|             |    |           | A  | ATTTT | Shanghai BC GWAS     | 0.16 | 0.97 (0.87-1.09) | 0.631                 | 0.95 |       |       |
|             |    |           | A  | ATTTT | Shanghai BC GWAS     | 0.16 | 0.97 (0.87-1.09) | 0.631                 | 0.95 |       |       |
| rs855596    | 12 | 103045519 | T  | C     | BCAC Asian iCOGs     | 0.07 | 0.85 (0.76-0.95) | 0.003                 | 1.00 | 11.9% | 0.338 |
|             |    |           | T  | C     | BCAC Asian OncoArray | 0.07 | 0.94 (0.85-1.03) | 0.160                 | 0.97 |       |       |
|             |    |           | T  | C     | Japanese GWAS        | 0.07 | 0.94 (0.80-1.10) | 0.423                 | 1.00 |       |       |
|             |    |           | T  | C     | Korean GWAS          | 0.08 | 0.88 (0.75-1.04) | 0.139                 | 0.98 |       |       |
|             |    |           | T  | C     | Korean GWAS          | 0.08 | 0.88 (0.75-1.04) | 0.139                 | 0.98 |       |       |

|            |    |          |   |   |                      |      |                  |                       |      |       |       |
|------------|----|----------|---|---|----------------------|------|------------------|-----------------------|------|-------|-------|
|            |    |          | T | C | MEGA HCES-1          | 0.07 | 1.59 (0.96-2.65) | 0.072                 | 0.99 |       |       |
|            |    |          | T | C | MEGA KPOP-BRCA       | 0.08 | 0.97 (0.76-1.24) | 0.821                 | 0.99 |       |       |
|            |    |          | T | C | MEGA SH              | 0.08 | 0.87 (0.73-1.04) | 0.120                 | 0.99 |       |       |
|            |    |          | T | C | Shanghai BC GWAS     | 0.07 | 0.85 (0.72-0.99) | 0.041                 | 1.00 |       |       |
| rs9316500  | 13 | 51094114 | T | G | Asian ExomeChip      | 0.44 | 0.98 (0.85-1.14) | 0.827                 | 0.38 | 0.4%  | 0.431 |
|            |    |          | T | G | BCAC Asian iCOGs     | 0.37 | 1.10 (1.03-1.16) | 0.002                 | 0.99 |       |       |
|            |    |          | T | G | BCAC Asian OncoArray | 0.35 | 1.03 (0.98-1.08) | 0.286                 | 1.00 |       |       |
|            |    |          | T | G | Japanese GWAS        | 0.42 | 1.07 (0.98-1.16) | 0.134                 | 1.00 |       |       |
|            |    |          | T | G | Korean GWAS          | 0.33 | 1.12 (1.02-1.22) | 0.021                 | 1.00 |       |       |
|            |    |          | T | G | MEGA HCES-1          | 0.32 | 1.21 (0.93-1.57) | 0.161                 | 1.00 |       |       |
|            |    |          | T | G | MEGA KPOP-BRCA       | 0.33 | 1.04 (0.91-1.19) | 0.590                 | 1.00 |       |       |
|            |    |          | T | G | MEGA SH              | 0.33 | 1.02 (0.92-1.12) | 0.721                 | 1.00 |       |       |
|            |    |          | T | G | Shanghai BC GWAS     | 0.33 | 1.00 (0.92-1.09) | 0.984                 | 1.00 |       |       |
| rs75004998 | 14 | 77517786 | A | G | BCAC Asian iCOGs     | 0.49 | 0.93 (0.88-0.98) | 0.010                 | 1.00 | 0     | 0.878 |
|            |    |          | A | G | BCAC Asian OncoArray | 0.50 | 0.96 (0.92-1.01) | 0.116                 | 1.00 |       |       |
|            |    |          | A | G | Japanese GWAS        | 0.50 | 0.97 (0.90-1.06) | 0.513                 | 1.00 |       |       |
|            |    |          | A | G | Korean GWAS          | 0.54 | 0.99 (0.90-1.08) | 0.762                 | 0.90 |       |       |
|            |    |          | A | G | MEGA HCES-1          | 0.54 | 0.93 (0.72-1.19) | 0.552                 | 0.96 |       |       |
|            |    |          | A | G | MEGA KPOP-BRCA       | 0.56 | 0.98 (0.86-1.12) | 0.785                 | 0.96 |       |       |
|            |    |          | A | G | MEGA SH              | 0.52 | 0.98 (0.90-1.07) | 0.680                 | 0.96 |       |       |
|            |    |          | A | G | Shanghai BC GWAS     | 0.52 | 1.00 (0.92-1.09) | 0.975                 | 0.97 |       |       |
| rs8027365  | 15 | 75808740 | A | C | Asian ExomeChip      | 0.64 | 1.02 (0.91-1.15) | 0.707                 | 0.67 | 16.8% | 0.293 |
|            |    |          | A | C | BCAC Asian iCOGs     | 0.63 | 1.08 (1.02-1.14) | 0.011                 | 0.98 |       |       |
|            |    |          | A | C | BCAC Asian OncoArray | 0.64 | 1.02 (0.97-1.07) | 0.544                 | 0.99 |       |       |
|            |    |          | A | C | Japanese GWAS        | 0.57 | 1.10 (1.02-1.20) | 0.021                 | 0.98 |       |       |
|            |    |          | A | C | Korean GWAS          | 0.61 | 0.96 (0.87-1.06) | 0.440                 | 0.85 |       |       |
|            |    |          | A | C | MEGA HCES-1          | 0.62 | 1.08 (0.84-1.40) | 0.547                 | 0.98 |       |       |
|            |    |          | A | C | MEGA KPOP-BRCA       | 0.61 | 1.00 (0.88-1.15) | 0.953                 | 0.98 |       |       |
|            |    |          | A | C | MEGA SH              | 0.64 | 1.03 (0.94-1.14) | 0.478                 | 0.98 |       |       |
|            |    |          | A | C | Shanghai BC GWAS     | 0.63 | 1.12 (1.02-1.22) | 0.013                 | 0.93 |       |       |
| rs76535198 | 16 | 71892498 | A | C | Asian ExomeChip      | 0.76 | 1.07 (0.94-1.21) | 0.303                 | 0.72 | 0     | 0.626 |
|            |    |          | A | C | BCAC Asian iCOGs     | 0.71 | 1.13 (1.06-1.20) | 1.06×10 <sup>-4</sup> | 1.00 |       |       |
|            |    |          | A | C | BCAC Asian OncoArray | 0.73 | 1.03 (0.97-1.08) | 0.363                 | 1.00 |       |       |
|            |    |          | A | C | Japanese GWAS        | 0.66 | 1.08 (0.99-1.17) | 0.089                 | 1.00 |       |       |

|            |    |          |     |   |                      |      |                  |       |      |      |       |
|------------|----|----------|-----|---|----------------------|------|------------------|-------|------|------|-------|
|            |    |          | A   | C | Korean GWAS          | 0.71 | 1.09 (0.98-1.22) | 0.117 | 0.79 |      |       |
|            |    |          | A   | C | MEGA HCES-1          | 0.71 | 1.10 (0.84-1.44) | 0.487 | 0.99 |      |       |
|            |    |          | A   | C | MEGA KPOP-BRCA       | 0.69 | 1.05 (0.91-1.22) | 0.482 | 0.99 |      |       |
|            |    |          | A   | C | MEGA SH              | 0.76 | 1.09 (0.99-1.22) | 0.093 | 0.99 |      |       |
|            |    |          | A   | C | Shanghai BC GWAS     | 0.76 | 1.10 (1.00-1.22) | 0.051 | 0.94 |      |       |
| rs12481286 | 20 | 52287610 | T   | G | BCAC Asian iCOGs     | 0.32 | 1.06 (0.99-1.13) | 0.078 | 0.93 | 1.7% | 0.416 |
|            |    |          | T   | G | BCAC Asian OncoArray | 0.32 | 1.04 (0.98-1.09) | 0.212 | 0.87 |      |       |
|            |    |          | T   | G | Japanese GWAS        | 0.27 | 1.04 (0.95-1.14) | 0.426 | 0.97 |      |       |
|            |    |          | T   | G | Korean GWAS          | 0.29 | 0.96 (0.87-1.06) | 0.449 | 0.99 |      |       |
|            |    |          | T   | G | MEGA HCES-1          | 0.30 | 1.29 (0.97-1.71) | 0.076 | 0.99 |      |       |
|            |    |          | T   | G | MEGA KPOP-BRCA       | 0.28 | 1.03 (0.90-1.19) | 0.643 | 0.99 |      |       |
|            |    |          | T   | G | MEGA SH              | 0.34 | 1.04 (0.95-1.15) | 0.394 | 0.99 |      |       |
|            |    |          | T   | G | Shanghai BC GWAS     | 0.34 | 1.11 (1.02-1.22) | 0.017 | 0.97 |      |       |
| rs35418111 | 21 | 47856670 | A   | G | Asian ExomeChip      | 0.19 | 1.04 (0.88-1.23) | 0.649 | 0.46 | 0    | 0.962 |
|            |    |          | A   | G | BCAC Asian iCOGs     | 0.20 | 1.09 (1.02-1.17) | 0.016 | 0.96 |      |       |
|            |    |          | A   | G | BCAC Asian OncoArray | 0.20 | 1.05 (0.99-1.12) | 0.092 | 0.97 |      |       |
|            |    |          | A   | G | Japanese GWAS        | 0.22 | 1.05 (0.95-1.16) | 0.384 | 0.95 |      |       |
|            |    |          | A   | G | Korean GWAS          | 0.20 | 1.08 (0.96-1.21) | 0.214 | 0.84 |      |       |
|            |    |          | A   | G | MEGA HCES-1          | 0.21 | 1.08 (0.79-1.47) | 0.645 | 0.94 |      |       |
|            |    |          | A   | G | MEGA KPOP-BRCA       | 0.21 | 1.02 (0.87-1.20) | 0.789 | 0.94 |      |       |
|            |    |          | A   | G | MEGA SH              | 0.22 | 1.12 (1.01-1.26) | 0.039 | 0.94 |      |       |
|            |    |          | A   | G | Shanghai BC GWAS     | 0.21 | 1.12 (1.00-1.24) | 0.045 | 0.88 |      |       |
| rs34331122 | 22 | 19762428 | CTT | C | BCAC Asian iCOGs     | 0.55 | 0.94 (0.88-1.00) | 0.034 | 0.91 | 0    | 0.846 |
|            |    |          | CTT | C | BCAC Asian OncoArray | 0.55 | 0.96 (0.91-1.01) | 0.089 | 0.94 |      |       |
|            |    |          | CTT | C | Japanese GWAS        | 0.53 | 0.91 (0.83-0.99) | 0.031 | 0.89 |      |       |
|            |    |          | CTT | C | MEGA HCES-1          | 0.58 | 0.98 (0.74-1.28) | 0.870 | 0.89 |      |       |
|            |    |          | CTT | C | MEGA KPOP-BRCA       | 0.55 | 0.88 (0.76-1.01) | 0.062 | 0.89 |      |       |
|            |    |          | CTT | C | MEGA SH              | 0.60 | 0.91 (0.82-1.00) | 0.058 | 0.89 |      |       |
|            |    |          | CTT | C | Shanghai BC GWAS     | 0.61 | 0.95 (0.85-1.07) | 0.402 | 0.56 |      |       |

---
