# Supplementary material for: Identification of novel breast cancer susceptibility loci in meta-analyses conducted among Asian and European descendants
Source: PubMed Central journal article supplement (PMC7057957; doi:10.1038/s41467-020-15046-w), 2020-03-05
Supplement: 41467_2020_15046_MOESM5_ESM.pdf [file 41467_2020_15046_MOESM5_ESM.pdf]

**Supplementary Data 2. Association results of 28 loci in each dataset of BCAC Europeans**

| SNP        | Chr | BP        | Test | Other   | Dataset   | EAF  | OR (95% CI)     | P                    |
|------------|-----|-----------|------|---------|-----------|------|-----------------|----------------------|
| rs72906468 | 1   | 17772093  | A    | T       | Meta      | 0.77 | 1.04(1.02-1.05) | $2.3 \times 10^{-6}$ |
|            |     |           |      |         | GWAS      | 0.78 | 1.08(1.03-1.12) | $4.3 \times 10^{-4}$ |
|            |     |           |      |         | iCOGS     | 0.78 | 1.02(0.99-1.04) | 0.16                 |
|            |     |           |      |         | OncoArray | 0.77 | 1.04(1.02-1.06) | $1.6 \times 10^{-4}$ |
| rs3790585  | 1   | 46023356  | A    | T       | Meta      | 0.84 | 1.03(1.02-1.06) | $8.8 \times 10^{-7}$ |
|            |     |           |      |         | GWAS      | 0.85 | 1.03(0.98-1.08) | 0.31                 |
|            |     |           |      |         | iCOGS     | 0.85 | 1.04(1.02-1.08) | $1.9 \times 10^{-3}$ |
|            |     |           |      |         | OncoArray | 0.85 | 1.05(1.02-1.08) | $1.6 \times 10^{-4}$ |
| rs2758598  | 1   | 156194339 | A    | G       | Meta      | 0.33 | 1.03(1.02-1.05) | $8.4 \times 10^{-7}$ |
|            |     |           |      |         | GWAS      | 0.33 | 1.03(1.00-1.03) | 0.09                 |
|            |     |           |      |         | iCOGS     | 0.33 | 1.03(1.01-1.05) | $5.2 \times 10^{-3}$ |
|            |     |           |      |         | OncoArray | 0.33 | 1.04(1.02-1.06) | $2.1 \times 10^{-4}$ |
| rs6756513  | 2   | 70172587  | A    | G       | Meta      | 0.29 | 0.96(0.95-0.98) | $4.2 \times 10^{-7}$ |
|            |     |           |      |         | GWAS      | 0.28 | 0.95(0.92-0.99) | 0.01                 |
|            |     |           |      |         | iCOGS     | 0.29 | 0.97(0.94-0.99) | $2.9 \times 10^{-3}$ |
|            |     |           |      |         | OncoArray | 0.28 | 0.97(0.95-0.99) | $1.0 \times 10^{-3}$ |
| rs73006998 | 3   | 150464271 | A    | G       | Meta      | 0.03 | 0.94(0.91-0.98) | $5.8 \times 10^{-3}$ |
|            |     |           |      |         | GWAS      | 0.03 | 0.96(0.85-1.09) | 0.56                 |
|            |     |           |      |         | iCOGS     | 0.03 | 0.92(0.87-0.98) | 0.01                 |
|            |     |           |      |         | OncoArray | 0.02 | 0.96(0.91-1.02) | 0.18                 |
| rs11281251 | 3   | 156519412 | T    | TTGTGAC | Meta      | 0.39 | 0.97(0.96-0.98) | $4.2 \times 10^{-7}$ |
|            |     |           |      |         | GWAS      | 0.38 | 0.97(0.93-1.00) | 0.07                 |
|            |     |           |      |         | iCOGS     | 0.39 | 1.04(1.01-1.06) | $5.6 \times 10^{-4}$ |
|            |     |           |      |         | OncoArray | 0.39 | 1.03(1.01-1.05) | $1.2 \times 10^{-3}$ |
| rs11947923 | 4   | 53911337  | T    | C       | Meta      | 0.37 | 0.97(0.96-0.98) | $1.0 \times 10^{-6}$ |
|            |     |           |      |         | GWAS      | 0.38 | 0.96(0.93-0.99) | 0.02                 |
|            |     |           |      |         | iCOGS     | 0.37 | 0.98(0.96-1.00) | 0.04                 |
|            |     |           |      |         | OncoArray | 0.37 | 0.96(0.94-0.98) | $5.5 \times 10^{-5}$ |
| rs11944638 | 4   | 48227719  | T    | C       | Meta      | 0.93 | 1.05(1.02-1.08) | $3.1 \times 10^{-4}$ |
|            |     |           |      |         | GWAS      | 0.93 | 1.07(1.00-1.15) | 0.04                 |
|            |     |           |      |         | iCOGS     | 0.93 | 1.05(1.01-1.10) | 0.01                 |
|            |     |           |      |         | OncoArray | 0.93 | 1.04(1.00-1.08) | 0.06                 |
| rs6555134  | 5   | 2776483   | T    | C       | Meta      | 0.58 | 0.97(0.96-0.98) | $3.6 \times 10^{-7}$ |
|            |     |           |      |         | GWAS      | 0.58 | 0.97(0.93-1.01) | 0.11                 |
|            |     |           |      |         | iCOGS     | 0.58 | 0.97(0.95-0.99) | 0.01                 |
|            |     |           |      |         | OncoArray | 0.58 | 0.96(0.94-0.98) | $2.0 \times 10^{-5}$ |
| rs7765429  | 6   | 21904169  | T    | C       | Meta      | 0.46 | 0.97(0.96-0.98) | $3.3 \times 10^{-7}$ |
|            |     |           |      |         | GWAS      | 0.46 | 0.97(0.94-1.01) | 0.12                 |

|             |    |           |    |       |           |      |                 |                      |
|-------------|----|-----------|----|-------|-----------|------|-----------------|----------------------|
| rs7768862   | 6  | 85088846  | A  | T     | iCOGS     | 0.46 | 0.97(0.95-0.98) | $3.1 \times 10^{-4}$ |
|             |    |           |    |       | OncoArray | 0.47 | 0.97(0.95-0.99) | $1.0 \times 10^{-3}$ |
|             |    |           |    |       | Meta      | 0.51 | 0.97(0.96-0.98) | $6.5 \times 10^{-6}$ |
|             |    |           |    |       | GWAS      | 0.51 | 0.97(0.93-1.00) | 0.06                 |
| rs6940159   | 6  | 170332621 | T  | C     | iCOGS     | 0.51 | 0.97(0.95-0.98) | $4.0 \times 10^{-4}$ |
|             |    |           |    |       | OncoArray | 0.50 | 0.98(0.96-1.00) | 0.02                 |
|             |    |           |    |       | Meta      | 0.38 | 0.97(0.96-0.98) | $2.7 \times 10^{-7}$ |
|             |    |           |    |       | GWAS      | 0.39 | 1.00(0.97-1.04) | 0.98                 |
| rs144145984 | 8  | 23644003  | CT | C     | iCOGS     | 0.38 | 0.96(0.94-0.98) | $1.6 \times 10^{-4}$ |
|             |    |           |    |       | OncoArray | 0.39 | 0.96(0.94-0.98) | $6.2 \times 10^{-5}$ |
|             |    |           |    |       | Meta      | 0.57 | 0.97(0.96-0.98) | $1.7 \times 10^{-6}$ |
|             |    |           |    |       | GWAS      | 0.57 | 0.96(0.93-1.00) | 0.06                 |
| rs2849506   | 8  | 101329134 | C  | G     | iCOGS     | 0.58 | 0.98(0.96-0.99) | 0.01                 |
|             |    |           |    |       | OncoArray | 0.58 | 0.97(0.95-0.98) | $2.6 \times 10^{-4}$ |
|             |    |           |    |       | Meta      | 0.40 | 0.97(0.96-0.98) | $7.5 \times 10^{-6}$ |
|             |    |           |    |       | GWAS      | 0.40 | 0.96(0.93-1.00) | 0.06                 |
| rs142360995 | 8  | 118205719 | A  | G     | iCOGS     | 0.40 | 0.98(0.96-1.00) | 0.02                 |
|             |    |           |    |       | OncoArray | 0.40 | 0.97(0.95-0.99) | $6.8 \times 10^{-4}$ |
|             |    |           |    |       | Meta      | 0.20 | 1.03(1.02-1.05) | $1.0 \times 10^{-5}$ |
|             |    |           |    |       | GWAS      | 0.21 | 1.04(1.00-1.09) | 0.03                 |
| rs10820600  | 9  | 106856692 | T  | C     | iCOGS     | 0.20 | 1.03(1.01-1.06) | $8.4 \times 10^{-3}$ |
|             |    |           |    |       | OncoArray | 0.21 | 1.03(1.01-1.06) | $4.1 \times 10^{-3}$ |
|             |    |           |    |       | Meta      | 0.44 | 0.97(0.96-0.98) | $1.8 \times 10^{-7}$ |
|             |    |           |    |       | GWAS      | 0.45 | 0.94(0.91-0.97) | $5.0 \times 10^{-4}$ |
| rs541079479 | 10 | 22861533  | CA | C     | iCOGS     | 0.45 | 0.97(0.95-0.99) | $3.5 \times 10^{-3}$ |
|             |    |           |    |       | OncoArray | 0.44 | 0.97(0.95-0.99) | $1.9 \times 10^{-3}$ |
|             |    |           |    |       | Meta      | 0.42 | 1.03(1.02-1.05) | $6.9 \times 10^{-7}$ |
|             |    |           |    |       | GWAS      | 0.41 | 1.09(1.05-1.14) | $3.8 \times 10^{-6}$ |
| rs2901157   | 10 | 119262365 | A  | G     | iCOGS     | 0.42 | 1.02(1.00-1.04) | 0.09                 |
|             |    |           |    |       | OncoArray | 0.41 | 1.03(1.01-1.05) | $6.4 \times 10^{-4}$ |
|             |    |           |    |       | Meta      | 0.89 | 1.05(1.03-1.07) | $2.3 \times 10^{-6}$ |
|             |    |           |    |       | GWAS      | 0.88 | 1.08(1.03-1.15) | $4.8 \times 10^{-3}$ |
| rs10838267  | 11 | 44368892  | A  | G     | iCOGS     | 0.89 | 1.04(1.01-1.08) | 0.01                 |
|             |    |           |    |       | OncoArray | 0.89 | 1.05(1.02-1.07) | $2.0 \times 10^{-3}$ |
|             |    |           |    |       | Meta      | 0.54 | 1.03(1.02-1.05) | $3.2 \times 10^{-7}$ |
|             |    |           |    |       | GWAS      | 0.53 | 1.04(1.01-1.08) | 0.01                 |
| rs78588049  | 12 | 69180907  | A  | ATTTT | iCOGS     | 0.54 | 1.03(1.01-1.05) | $7.1 \times 10^{-4}$ |
|             |    |           |    |       | OncoArray | 0.55 | 1.03(1.01-1.05) | $2.5 \times 10^{-3}$ |
|             |    |           |    |       | Meta      | 0.20 | 0.96(0.95-0.98) | $3.3 \times 10^{-6}$ |
|             |    |           |    |       | GWAS      | 0.20 | 0.94(0.89-0.98) | $7.4 \times 10^{-3}$ |

|            |    |           |     |   |           |      |                 |                      |
|------------|----|-----------|-----|---|-----------|------|-----------------|----------------------|
|            |    |           |     |   | iCOGS     | 0.20 | 0.97(0.95-1.00) | 0.04                 |
|            |    |           |     |   | OncoArray | 0.20 | 0.96(0.94-0.98) | 4.7×10 <sup>-4</sup> |
| rs855596   | 12 | 103045519 | T   | C | Meta      | 0.03 | 0.92(0.89-0.96) | 1.9×10 <sup>-5</sup> |
|            |    |           |     |   | GWAS      | 0.04 | 0.81(0.73-0.90) | 1.6×10 <sup>-4</sup> |
|            |    |           |     |   | iCOGS     | 0.03 | 0.97(0.92-1.02) | 0.28                 |
|            |    |           |     |   | OncoArray | 0.03 | 0.90(0.85-0.96) | 5.7×10 <sup>-4</sup> |
| rs9316500  | 13 | 51094114  | T   | G | Meta      | 0.71 | 1.03(1.02-1.05) | 6.7×10 <sup>-6</sup> |
|            |    |           |     |   | GWAS      | 0.71 | 1.03(0.99-1.07) | 0.14                 |
|            |    |           |     |   | iCOGS     | 0.71 | 1.04(1.02-1.06) | 3.3×10 <sup>-4</sup> |
|            |    |           |     |   | OncoArray | 0.70 | 1.02(1.01-1.04) | 0.01                 |
| rs75004998 | 14 | 77517786  | A   | G | Meta      | 0.33 | 0.97(0.96-0.98) | 1.8×10 <sup>-6</sup> |
|            |    |           |     |   | GWAS      | 0.33 | 0.97(0.93-1.00) | 0.06                 |
|            |    |           |     |   | iCOGS     | 0.33 | 0.97(0.95-0.99) | 1.3×10 <sup>-3</sup> |
|            |    |           |     |   | OncoArray | 0.33 | 0.97(0.95-0.99) | 2.5×10 <sup>-3</sup> |
| rs8027365  | 15 | 75808740  | A   | C | Meta      | 0.73 | 1.04(1.02-1.05) | 9.7×10 <sup>-8</sup> |
|            |    |           |     |   | GWAS      | 0.74 | 1.02(0.98-1.06) | 0.32                 |
|            |    |           |     |   | iCOGS     | 0.74 | 1.04(1.02-1.06) | 5.6×10 <sup>-4</sup> |
|            |    |           |     |   | OncoArray | 0.72 | 1.04(1.02-1.06) | 4.9×10 <sup>-5</sup> |
| rs76535198 | 16 | 71892498  | A   | C | Meta      | 0.86 | 1.04(1.03-1.06) | 2.3×10 <sup>-6</sup> |
|            |    |           |     |   | GWAS      | 0.87 | 1.05(1.00-1.11) | 0.06                 |
|            |    |           |     |   | iCOGS     | 0.87 | 1.05(1.02-1.08) | 8.2×10 <sup>-4</sup> |
|            |    |           |     |   | OncoArray | 0.86 | 1.04(1.01-1.06) | 4.6×10 <sup>-3</sup> |
| rs12481286 | 20 | 52287610  | T   | G | Meta      | 0.24 | 1.04(1.03-1.06) | 1.0×10 <sup>-7</sup> |
|            |    |           |     |   | GWAS      | 0.23 | 1.06(1.01-1.11) | 0.01                 |
|            |    |           |     |   | iCOGS     | 0.24 | 1.04(1.02-1.07) | 3.6×10 <sup>-4</sup> |
|            |    |           |     |   | OncoArray | 0.24 | 1.04(1.01-1.06) | 1.6×10 <sup>-3</sup> |
| rs35418111 | 21 | 47856670  | A   | G | Meta      | 0.07 | 1.06(1.04-1.09) | 6.1×10 <sup>-7</sup> |
|            |    |           |     |   | GWAS      | 0.08 | 1.11(1.04-1.18) | 2.3×10 <sup>-3</sup> |
|            |    |           |     |   | iCOGS     | 0.08 | 1.04(1.01-1.08) | 0.02                 |
|            |    |           |     |   | OncoArray | 0.07 | 1.07(1.03-1.10) | 3.3×10 <sup>-4</sup> |
| rs34331122 | 22 | 19762428  | CTT | C | Meta      | 0.46 | 0.97(0.96-0.98) | 7.2×10 <sup>-6</sup> |
|            |    |           |     |   | GWAS      | 0.45 | 0.99(0.96-1.03) | 0.73                 |
|            |    |           |     |   | iCOGS     | 0.45 | 0.97(0.95-0.99) | 3.6×10 <sup>-3</sup> |
|            |    |           |     |   | OncoArray | 0.46 | 0.97(0.95-0.98) | 2.9×10 <sup>-4</sup> |

---
