# Supplementary material for: Identification of novel breast cancer susceptibility loci in meta-analyses conducted among Asian and European descendants
Source: PubMed Central journal article supplement (PMC7057957; doi:10.1038/s41467-020-15046-w), 2020-03-05
Supplement: 41467_2020_15046_MOESM7_ESM.pdf [file 41467_2020_15046_MOESM7_ESM.pdf]

Supplementary Data 4. Regulatory functional annotation of SNPs in high LD (r<sup>2</sup>>0.8) with newly-associated SNPs in European populations using haploReg

| SNP       | Ch | BP       | LD   | r <sup>2</sup> | ref | alt | AFR  | AMR  | EUR  | CEP  | CHB  | CHS  | Promoter (ENCODE) | Enhancer (Roadmap)                     | Promoter (Roadmap) | Enhancer (Roadmap) | Gene | hSNP Functional annotation |       |
|-----------|----|----------|------|----------------|-----|-----|------|------|------|------|------|------|-------------------|----------------------------------------|--------------------|--------------------|------|----------------------------|-------|
| rs1294868 | 1  | 1772848  | A    | 0.8            | A   | G   | 0.05 | 0.05 | 0.05 | 0.05 | 0.05 | 0.05 |                   |                                        |                    |                    | CC   |                            |       |
| rs4548121 | 1  | 1772527  | 0.84 | 0.93           | G   | A   | 0.15 | 0.25 | 0.36 | 0.21 | 0.0  | 0.0  |                   |                                        |                    |                    | A    |                            |       |
| rs4076104 | 1  | 1772872  | 0.84 | 0.93           | G   | A   | 0.12 | 0.26 | 0.36 | 0.21 | 0.0  | 0.0  |                   | H1.7_Weak_Enhancer/K562_Weak_Enhancer  |                    |                    |      | PAD6                       |       |
| rs176420  | 1  | 1774021  | 0.84 | 0.93           | T   | C   | 0.07 | 0.12 | 0.15 | 0.02 | 0.0  | 0.0  |                   | H1.7_Weak_Enhancer/HKES2_Weak_Enhancer |                    |                    |      | PAD6                       | 3'UTR |
| rs1309700 | 1  | 1774204  | 0.84 | 0.93           | T   | C   | 0.15 | 0.25 | 0.37 | 0.21 | 0.0  | 0.0  |                   |                                        |                    |                    |      | PAD6                       | 5'UTR |
| rs408541  | 1  | 1773539  | 0.84 | 0.96           | C   | T   | 0.18 | 0.27 | 0.37 | 0.21 | 0.0  | 0.0  |                   |                                        |                    |                    |      | PAD6                       |       |
| rs49466   | 1  | 1773927  | 0.82 | 0.91           | G   | A   | 0.2  | 0.27 | 0.37 | 0.21 | 0.0  | 0.0  |                   |                                        |                    |                    |      | PAD6                       |       |
| rs388272  | 1  | 1773159  | 0.81 | 0.9            | G   | A   | 0.2  | 0.25 | 0.35 | 0.19 | 0.0  | 0.0  |                   |                                        | CDM4MP1502.4_Weak  |                    |      | PAD6                       |       |
| rs490726  | 1  | 1773944  | 0.81 | 0.9            | T   | C   | 0.2  | 0.22 | 0.30 | 0.19 | 0.0  | 0.0  |                   |                                        |                    |                    |      | PAD6                       |       |
| rs3504925 | 1  | 1774479  | 0.81 | 0.9            | C   | A   | 0.21 | 0.22 | 0.31 | 0.19 | 0.0  | 0.0  |                   |                                        |                    |                    |      | PAD6                       |       |
| rs709788  | 1  | 4623256  | -    | -              | A   | T   | 0.21 | 0.21 | 0.31 | 0.15 | 0.0  | 0.0  |                   |                                        |                    |                    |      | PAD6                       |       |
| rs1456    | 1  | 460360   | -    | -              | A   | T   | 0.17 | 0.27 | 0.45 | 0.28 | 0.0  | 0.0  |                   |                                        |                    |                    |      | PAD6                       |       |
| rs18216   | 1  | 4603737  | 0.85 | 0.95           | C   | T   | 0.17 | 0.27 | 0.45 | 0.28 | 0.0  | 0.0  |                   |                                        |                    |                    |      | PAD6                       |       |
| rs0947    | 1  | 4603794  | 0.85 | 0.95           | T   | C   | 0.16 | 0.27 | 0.46 | 0.35 | 0.0  | 0.0  |                   |                                        |                    |                    |      | PAD6                       |       |
| rs49969   | 1  | 4603877  | 0.87 | 0.98           | T   | C   | 0.15 | 0.26 | 0.37 | 0.35 | 0.0  | 0.0  |                   |                                        |                    |                    |      | PAD6                       |       |
| rs550410  | 1  | 4603922  | 0.82 | 0.94           | GC  | G   | 0.16 | 0.27 | 0.46 | 0.35 | 0.0  | 0.0  |                   |                                        |                    |                    |      | PAD6                       |       |
| rs278598  | 1  | 1568288  | -    | -              | G   | A   | 0.11 | 0.21 | 0.31 | 0.15 | 0.0  | 0.0  |                   |                                        |                    |                    |      | PAD6                       |       |
| rs427284  | 1  | 1561929  | 0.86 | 0.94           | A   | G   | 0.17 | 0.22 | 0.31 | 0.16 | 0.0  | 0.0  |                   |                                        |                    |                    |      | PAD6                       |       |
| rs1187860 | 1  | 1561591  | 0.85 | 0.93           | G   | C   | 0.17 | 0.22 | 0.31 | 0.16 | 0.0  | 0.0  |                   |                                        |                    |                    |      | PAD6                       |       |
| rs282615  | 1  | 1561867  | 0.84 | 0.92           | T   | C   | 0.16 | 0.22 | 0.31 | 0.15 | 0.0  | 0.0  |                   |                                        |                    |                    |      | PAD6                       |       |
| rs284265  | 1  | 15619932 | 0.84 | 0.92           | G   | A   | 0.16 | 0.24 | 0.31 | 0.15 | 0.0  | 0.0  |                   |                                        |                    |                    |      | PAD6                       |       |
| rs258616  | 1  | 15616058 | 0.81 | 0.9            | T   | C   | 0.16 | 0.22 | 0.31 | 0.15 | 0.0  | 0.0  |                   |                                        |                    |                    |      | PAD6                       |       |
| rs482869  | 1  | 15616096 | 0.84 | 0.92           | A   | G   | 0.16 | 0.23 | 0.31 | 0.15 | 0.0  | 0.0  |                   |                                        |                    |                    |      | PAD6                       |       |
| rs278618  | 1  | 15616092 | 0.84 | 0.92           | T   | C   | 0.16 | 0.23 | 0.31 | 0.15 | 0.0  | 0.0  |                   |                                        |                    |                    |      | PAD6                       |       |
| rs278619  | 1  | 15616093 | 0.86 | 0.92           | A   | G   | 0.16 | 0.23 | 0.31 | 0.15 | 0.0  | 0.0  |                   |                                        |                    |                    |      | PAD6                       |       |
| rs420183  | 1  | 15616485 | 0.89 | 0.96           | C   | G   | 0.18 | 0.28 | 0.35 | 0.15 | 0.0  | 0.0  |                   |                                        |                    |                    |      | PAD6                       |       |
| rs300790  | 1  | 15616520 | 0.86 | 0.93           | T   | C   | 0.17 | 0.22 | 0.31 | 0.15 | 0.0  | 0.0  |                   |                                        |                    |                    |      | PAD6                       |       |
| rs284282  | 1  | 15616512 | 0.86 | 0.93           | T   | C   | 0.17 | 0.22 | 0.31 | 0.15 | 0.0  | 0.0  |                   |                                        |                    |                    |      | PAD6                       |       |
| rs284283  | 1  | 15616513 | 0.86 | 0.93           | T   | C   | 0.17 | 0.22 | 0.31 | 0.15 | 0.0  | 0.0  |                   |                                        |                    |                    |      | PAD6                       |       |
| rs284284  | 1  | 15616514 | 0.86 | 0.93           | T   | C   | 0.17 | 0.22 | 0.31 | 0.15 | 0.0  | 0.0  |                   |                                        |                    |                    |      | PAD6                       |       |
| rs307299  | 1  | 15616490 | 0.82 | 0.98           | A   | G   | 0.16 | 0.23 | 0.31 | 0.16 | 0.0  | 0.0  |                   |                                        |                    |                    |      | PAD6                       |       |
| rs225877  | 1  | 15617296 | 0.88 | 0.94           | C   | G   | 0.16 | 0.23 | 0.31 | 0.15 | 0.0  | 0.0  |                   |                                        |                    |                    |      | PAD6                       |       |
| rs258616  | 1  | 15616058 | 0.81 | 0.9            | T   | C   | 0.16 | 0.22 | 0.31 | 0.15 | 0.0  | 0.0  |                   |                                        |                    |                    |      | PAD6                       |       |
| rs226614  | 1  | 15617085 | 0.88 | 0.94           | T   | C   | 0.16 | 0.23 | 0.31 | 0.15 | 0.0  | 0.0  |                   |                                        |                    |                    |      | PAD6                       |       |
| rs278618  | 1  | 15616092 | 0.87 | 0.92           | GA  | G   | 0.16 | 0.23 | 0.31 | 0.15 | 0.0  | 0.0  |                   |                                        |                    |                    |      | PAD6                       |       |
| rs2009631 | 1  | 15617403 | 0.83 | 0.92           | GA  | G   | 0.16 | 0.23 | 0.31 | 0.15 | 0.0  | 0.0  |                   |                                        |                    |                    |      | PAD6                       |       |
| rs224108  | 1  | 15618307 | 0.82 | 0.98           | C   | G   | 0.16 | 0.23 | 0.31 | 0.16 | 0.0  | 0.0  |                   |                                        |                    |                    |      | PAD6                       |       |
| rs28344   | 1  | 15618770 | 0.82 | 0.97           | C   | G   | 0.16 | 0.23 | 0.31 | 0.16 | 0.0  | 0.0  |                   |                                        |                    |                    |      | PAD6                       |       |
| rs224107  | 1  | 15618307 | 0.82 | 0.97           | T   | C   | 0.16 | 0.23 | 0.31 | 0.16 | 0.0  | 0.0  |                   |                                        |                    |                    |      | PAD6                       |       |
| rs240178  | 1  | 15618451 | 0.81 | 0.97           | T   | C   | 0.16 | 0.23 | 0.31 | 0.16 | 0.0  | 0.0  |                   |                                        |                    |                    |      | PAD6                       |       |
| rs117703  | 1  | 15618458 | 0.81 | 0.97           | T   | C   | 0.16 | 0.23 | 0.31 | 0.16 | 0.0  | 0.0  |                   |                                        |                    |                    |      | PAD6                       |       |
| rs224444  | 1  | 15618498 | 0.86 | 0.98           | G   | A   | 0.19 | 0.29 | 0.35 | 0.15 | 0.0  | 0.0  |                   |                                        |                    |                    |      | PAD6                       |       |
| rs240178  | 1  | 15618451 | 0.81 | 0.97           | T   | C   | 0.16 | 0.23 | 0.31 | 0.16 | 0.0  | 0.0  |                   |                                        |                    |                    |      | PAD6                       |       |
| rs283543  | 1  | 15618403 | 0.86 | 0.98           | G   | A   | 0.19 | 0.29 | 0.35 | 0.15 | 0.0  | 0.0  |                   |                                        |                    |                    |      | PAD6                       |       |
| rs278618  | 1  | 15616092 | 0.87 | 0.92           | GA  | G   | 0.16 | 0.23 | 0.31 | 0.15 | 0.0  | 0.0  |                   |                                        |                    |                    |      | PAD6                       |       |
| rs23757   | 1  | 15618654 | 0.82 | 0.97           | C   | G   | 0.16 | 0.23 | 0.31 | 0.15 | 0.0  | 0.0  |                   |                                        |                    |                    |      | PAD6                       |       |
| rs224073  | 1  | 15618214 | 0.86 | 0.98           | A   | G   | 0.16 | 0.23 | 0.31 | 0.16 | 0.0  | 0.0  |                   |                                        |                    |                    |      | PAD6                       |       |
| rs240178  | 1  | 15618451 | 0.81 | 0.97           | T   | C   | 0.16 | 0.23 | 0.31 | 0.16 | 0.0  | 0.0  |                   |                                        |                    |                    |      | PAD6                       |       |
| rs292964  | 1  | 15618973 | 0.88 | 0.94           | T   | C   | 0.16 | 0.23 | 0.31 | 0.15 | 0.0  | 0.0  |                   |                                        |                    |                    |      | PAD6                       |       |
| rs240178  | 1  | 15618451 | 0.81 | 0.97           | T   | C   | 0.16 | 0.23 | 0.31 | 0.16 | 0.0  | 0.0  |                   |                                        |                    |                    |      | PAD6                       |       |
| rs24276   | 1  | 15619200 | 0.81 | 0.99           | C   | A   | 0.18 | 0.22 | 0.31 | 0.11 | 0.0  | 0.0  |                   |                                        |                    |                    |      | PAD6                       |       |
| rs09705   | 1  | 15619149 | 0.81 | 0.99           | T   | C   | 0.16 | 0.23 | 0.31 | 0.16 | 0.0  | 0.0  |                   |                                        |                    |                    |      | PAD6                       |       |
| rs240178  | 1  | 15618451 | 0.81 | 0.99           | T   | C   | 0.16 | 0.23 | 0.31 | 0.16 | 0.0  | 0.0  |                   |                                        |                    |                    |      | PAD6                       |       |
| rs242707  | 1  | 15619463 | 0.9  | 0.99           | C   | T   | 0.16 | 0.28 | 0.35 | 0.13 | 0.0  | 0.0  |                   |                                        |                    |                    |      | PAD6                       |       |
| rs278618  | 1  | 15616092 | 0.87 | 0.92           | GA  | G   | 0.16 | 0.23 | 0.31 | 0.15 | 0.0  | 0.0  |                   |                                        |                    |                    |      | PAD6                       |       |
| rs248074  | 1  | 15619588 | 0.87 | 0.99           | C   | T   | 0.19 | 0.31 | 0.36 | 0.15 | 0.0  | 0.0  |                   |                                        |                    |                    |      | PAD6                       |       |
| rs248080  | 1  | 15619971 | 0.91 | 0.99           | T   | A   | 0.17 | 0.27 | 0.34 | 0.14 | 0.0  | 0.0  |                   |                                        |                    |                    |      | PAD6                       |       |
| rs276613  | 1  | 15619616 | 0.97 | 0.98           | A   | T   | 0.22 | 0.31 | 0.37 | 0.17 | 0.0  | 0.0  |                   |                                        |                    |                    |      | PAD6                       |       |
| rs286413  | 1  | 15619780 | 0.87 | 0.96           | C   | T   | 0.22 | 0.31 | 0.37 | 0.17 | 0.0  | 0.0  |                   |                                        |                    |                    |      | PAD6                       |       |
| rs278618  | 1  | 15616092 | 0.87 | 0.92           | T   | C   | 0.16 | 0.23 | 0.31 | 0.15 | 0.0  | 0.0  |                   |                                        |                    |                    |      | PAD6                       |       |
| rs278618  | 1  | 15616092 | 0.87 | 0.92           | T   | C   | 0.16 | 0.23 | 0.31 | 0.15 | 0.0  | 0.0  |                   |                                        |                    |                    |      | PAD6                       |       |
| rs1482173 | 1  | 15620354 | 0.87 | 0.95           | T   | TA  | 0.42 | 0.32 | 0.37 | 0.17 | 0.0  | 0.0  |                   |                                        |                    |                    |      | PAD6                       |       |
| rs278618  | 1  | 15616092 | 0.87 | 0.92           | T   | C   | 0.16 | 0.23 | 0.31 | 0.15 | 0.0  | 0.0  |                   |                                        |                    |                    |      | PAD6                       |       |
| rs284270  | 1  | 15620071 | 0.88 | 0.97           | T   | C   | 0.15 | 0.34 | 0.37 | 0.17 | 0.0  | 0.0  |                   |                                        |                    |                    |      | PAD6                       |       |
| rs2023173 | 1  | 15620173 | 0.88 | 0.98           | A   | T   | 0.23 | 0.34 | 0.37 | 0.17 | 0.0  | 0.0  |                   |                                        |                    |                    |      | PAD6                       |       |
| rs27609   | 1  | 15620240 | 0.88 | 0.97           | C   | T   | 0.23 | 0.34 | 0.37 | 0.17 | 0.0  | 0.0  |                   |                                        |                    |                    |      | PAD6                       |       |
| rs278618  | 1  | 15620259 | 0.89 | 0.97           | G   | A   | 0.25 | 0.32 | 0.37 | 0.17 | 0.0  | 0.0  |                   |                                        |                    |                    |      | PAD6                       |       |
| rs278618  | 1  | 15620260 | 0.89 | 0.97           | A   | T   | 0.25 | 0.32 | 0.37 | 0.17 | 0.0  | 0.0  |                   |                                        |                    |                    |      | PAD6                       |       |
| rs278618  | 1  | 15620261 | 0.89 | 0.97           | G   | A   | 0.25 | 0.32 | 0.37 | 0.17 | 0.0  | 0.0  |                   |                                        |                    |                    |      | PAD6                       |       |
| rs251847  | 1  | 15620407 | 0.87 | 0.96           | G   | A   | 0.46 | 0.32 | 0.37 | 0.17 | 0.0  | 0.0  |                   |                                        |                    |                    |      | PAD6                       |       |
| rs24273   | 1  | 15620483 | 0.87 | 0.96           | C   | T   | 0.17 | 0.33 | 0.37 | 0.17 | 0.0  | 0.0  |                   |                                        |                    |                    |      | PAD6                       |       |
| rs276613  | 1  | 15620518 | 0.89 | 0.98           | A   | T   | 0.21 | 0.31 | 0.37 |      |      |      |                   |                                        |                    |                    |      |                            |       |
