# Supplementary material for: Identification of novel breast cancer susceptibility loci in meta-analyses conducted among Asian and European descendants
Source: PubMed Central journal article supplement (PMC7057957; doi:10.1038/s41467-020-15046-w), 2020-03-05
Supplement: 41467_2020_15046_MOESM8_ESM.pdf [file 41467_2020_15046_MOESM8_ESM.pdf]

|          |             |    |           |                                                  |      |             |                       |         |      |             |            |          |      |                      |               |
|----------|-------------|----|-----------|--------------------------------------------------|------|-------------|-----------------------|---------|------|-------------|------------|----------|------|----------------------|---------------|
| 9p21.3   | rs1011970   | 9  | 22062134  | T/G                                              | 1.03 | (0.99-1.08) | 0.145                 | 0.999   | 1.06 | (1.05-1.08) | 6.4×10-16  | 4.1E-12  | 1.07 | <i>CDKN2A,CDKN2B</i> |               |
| 9q31.2   | rs10759243  | 9  | 110306115 | A/C                                              | 1.05 | (1.02-1.08) | 2.9×10 <sup>-4</sup>  | 0.658   | 1.06 | (1.05-1.07) | 3.4×10-21  | 1.1E-17  | 1.06 |                      |               |
| 9q31.2   | rs10816625  | 9  | 110837073 | A/G                                              | 0.91 | (0.89-0.94) | 1.6×10 <sup>-10</sup> | 1.1E-06 | 0.90 | (0.89-0.92) | 7.7×10-27  | 2.6E-23  | 0.90 |                      |               |
| 9q31.2   | rs13294895  | 9  | 110837176 | T/C                                              | 1.03 | (0.94-1.13) | 0.562                 | 1.000   | 1.07 | (1.05-1.09) | 7.1×10-17  | 2.4E-13  | 1.07 | <i>ASTN2</i>         |               |
| 9q31.2   | rs676256    | 9  | 110895353 | T/C                                              | 1.05 | (0.98-1.12) | 0.194                 | 0.999   | 1.10 | (1.09-1.12) | 2.8×10-53  | 9.5E-50  | 1.10 |                      |               |
| 9q33.1   | rs1895062   | 9  | 119313486 | A/G                                              | 1.01 | (0.98-1.04) | 0.476                 | 1.000   | 1.04 | (1.03-1.06) | 1.1×10-13  | 7.4E-10  | 1.05 |                      |               |
| 9q33.3   | rs10760444  | 9  | 129396434 | A/G                                              | 0.93 | (0.91-0.96) | 1.0×10 <sup>-7</sup>  | 6.7E-04 | 0.96 | (0.95-0.97) | 8.3×10-14  | 5.3E-10  | 0.96 |                      | <i>LMX1B</i>  |
| 9q34.2   | rs8176636   | 9  | 136151579 | T/TGGTGCAGGCCG<br>AGGAAAAAATTTGTG<br>GCAATTCCTCA | 1.04 | (1.01-1.08) | 0.014                 | 0.989   | 1.05 | (1.03-1.06) | 4.9×10-10  | 3.2E-06  | 1.05 |                      | <i>ABO</i>    |
| 10p15.1  | rs2380205   | 10 | 5886734   | T/C                                              | 0.97 | (0.93-1.01) | 0.135                 | 0.999   | 0.98 | (0.97-0.99) | 5.3×10-05  | 2.6E-01  | 0.98 | <i>ANKRD16</i>       |               |
| 10p14    | rs67958007  | 10 | 9088113   | T/TG                                             | 1.01 | (0.96-1.08) | 0.638                 | 1.000   | 1.06 | (1.04-1.08) | 4.5×10-10  | 3.1E-06  | 1.06 | <i>DNAJC1</i>        |               |
| 10p12.31 | rs7072776   | 10 | 22032942  | A/G                                              | 1.01 | (0.95-1.08) | 0.677                 | 1.000   | 1.06 | (1.05-1.08) | 2.4×10-19  | 8.1E-16  | 1.06 |                      |               |
| 10p12.31 | rs11814448  | 10 | 22315843  | A/C                                              | 0.90 | (0.77-1.05) | 0.179                 | 0.999   | 0.84 | (0.80-0.87) | 4.0×10-18  | 1.3E-14  | 0.83 | <i>DNAJC1</i>        |               |
| 10q21.2  | rs10995201  | 10 | 64299890  | A/G                                              | 1.08 | (0.99-1.18) | 0.100                 | 0.998   | 1.14 | (1.12-1.16) | 5.1×10-52  | 1.7E-48  | 1.14 | <i>ZNF365</i>        |               |
| 10q22.3  | rs704010    | 10 | 80841148  | T/C                                              | 1.05 | (1.03-1.08) | 2.0×10 <sup>-4</sup>  | 0.575   | 1.08 | (1.06-1.09) | 3.4×10-38  | 1.1E-34  | 1.08 | <i>ZMZ1</i>          |               |
| 10q23.33 | rs140936696 | 10 | 95292187  | CAA/C                                            | 1.02 | (0.99-1.05) | 0.192                 | 0.999   | 1.04 | (1.03-1.06) | 5.4×10-08  | 3.6E-04  | 1.05 | <i>TCFL2</i>         |               |
| 10q25.2  | rs7904519   | 10 | 114773927 | A/G                                              | 0.98 | (0.91-1.05) | 0.529                 | 1.000   | 0.96 | (0.94-0.97) | 1.8×10-13  | 1.2E-09  | 0.96 |                      |               |
| 10q26.12 | rs11199914  | 10 | 123093901 | T/C                                              | 0.97 | (0.94-0.99) | 0.019                 | 0.992   | 0.96 | (0.95-0.97) | 4.2×10-13  | 2.9E-09  | 0.96 |                      |               |
| 10q26.13 | rs2981578   | 10 | 123340311 | T/C                                              | 0.83 | (0.80-0.85) | 6.5×10 <sup>-46</sup> | 2.2E-42 | 0.81 | (0.81-0.82) | 2.3×10-291 | 7.6E-288 | 0.81 |                      | <i>FGFR2</i>  |
| 10q26.13 | rs45631563  | 10 | 123349324 | A/T                                              | 0.95 | (0.77-1.17) | 0.617                 | 1.000   | 1.21 | (1.18-1.25) | 1.1×10-35  | 3.7E-32  | 1.22 | <i>FGFR2</i>         |               |
| 11p15    | rs6597981   | 11 | 803017    | A/G                                              | 0.98 | (0.95-1.01) | 0.253                 | 0.999   | 0.96 | (0.95-0.97) | 2.5×10-12  | 1.8E-08  | 0.96 | <i>PIDD1</i>         |               |
| 11p15.5  | rs3817198   | 11 | 1909006   | T/C                                              | 0.94 | (0.91-0.98) | 0.002                 | 0.922   | 0.94 | (0.93-0.95) | 5.5×10-21  | 1.8E-17  | 0.94 | <i>LSP1</i>          |               |
| 11q13.1  | rs3903072   | 11 | 65583066  | T/G                                              | 0.98 | (0.95-1.02) | 0.351                 | 1.000   | 0.96 | (0.95-0.97) | 5.7×10-12  | 3.8E-08  | 0.96 | <i>CCND1</i>         |               |
| 11q13.3  | rs75915166  | 11 | 69379161  | A/C                                              | 1.26 | (1.00-1.60) | 0.054                 | 0.997   | 1.30 | (1.27-1.33) | 1.3×10-96  | 4.3E-93  | 1.30 |                      |               |
| 11q22.3  | rs11374964  | 11 | 108345515 | G/GA                                             | 1.02 | (0.99-1.04) | 0.277                 | 0.999   | 1.00 | (0.99-1.01) | 6.5×10-01  | 1.0E+00  | 1.00 |                      | <i>KDEL2C</i> |
| 11q24.3  | rs11820646  | 11 | 129461171 | T/C                                              | 0.97 | (0.95-1.00) | 0.025                 | 0.994   | 0.96 | (0.95-0.97) | 3.3×10-15  | 2.2E-11  | 0.95 |                      |               |
| 12p13.1  | rs12422552  | 12 | 14413931  | C/G                                              | 1.08 | (1.05-1.11) | 6.0×10 <sup>-7</sup>  | 4.0E-03 | 1.06 | (1.05-1.07) | 2.4×10-20  | 7.9E-17  | 1.06 | <i>NTN4</i>          |               |
| 12p11.22 | rs7297051   | 12 | 28174817  | T/C                                              | 0.89 | (0.86-0.91) | 3.9×10 <sup>-14</sup> | 2.6E-10 | 0.89 | (0.87-0.90) | 5.5×10-72  | 1.8E-68  | 0.89 |                      |               |
| 12q21.31 | rs202049448 | 12 | 85009437  | T/C                                              | 0.99 | (0.96-1.03) | 0.711                 | 1.000   | 1.03 | (1.02-1.05) | 8.5×10-07  | 5.6E-03  | 1.04 | <i>TBX3</i>          |               |
| 12q22    | rs17356907  | 12 | 96027759  | A/G                                              | 1.05 | (1.02-1.08) | 0.002                 | 0.935   | 1.09 | (1.07-1.10) | 1.3×10-40  | 4.3E-37  | 1.09 |                      |               |
| 12q24.21 | rs1292011   | 12 | 115836522 | A/G                                              | 1.10 | (1.07-1.13) | 1.4×10 <sup>-10</sup> | 9.4E-07 | 1.09 | (1.08-1.10) | 1.0×10-47  | 3.4E-44  | 1.09 | <i>PAX9</i>          |               |
| 12q24.31 | rs206966    | 12 | 120832146 | T/C                                              | 1.02 | (0.96-1.09) | 0.496                 | 1.000   | 1.05 | (1.03-1.07) | 5.0×10-08  | 3.4E-04  | 1.05 |                      |               |
| 13q22.1  | rs6562760   | 13 | 73957681  | A/G                                              | 0.98 | (0.81-1.20) | 0.881                 | 1.000   | 0.96 | (0.94-0.97) | 1.3×10-09  | 8.9E-06  | 0.96 | <i>RAD51B</i>        |               |
| 14q13.3  | rs2236007   | 14 | 37132769  | A/G                                              | 0.93 | (0.91-0.96) | 6.4×10 <sup>-6</sup>  | 0.041   | 0.93 | (0.92-0.94) | 1.1×10-25  | 3.6E-22  | 0.93 |                      |               |
| 14q24.1  | rs2588809   | 14 | 68660428  | T/C                                              | 1.08 | (1.00-1.17) | 0.058                 | 0.997   | 1.07 | (1.05-1.08) | 1.3×10-14  | 8.6E-11  | 1.06 | <i>RAD51B</i>        |               |
| 14q24.1  | rs999737    | 14 | 69034682  | T/C                                              | 1.12 | (0.86-1.46) | 0.403                 | 1.000   | 0.91 | (0.90-0.92) | 1.2×10-38  | 4.0E-35  | 0.91 | <i>CCDC88C</i>       |               |
| 14q32.11 | rs941764    | 14 | 91841069  | A/G                                              | 0.96 | (0.93-1.00) | 0.050                 | 0.997   | 0.96 | (0.94-0.97) | 1.7×10-13  | 1.2E-09  | 0.95 | <i>RIN3</i>          |               |
| 14q32.12 | rs11627032  | 14 | 93104072  | T/C                                              | 1.02 | (0.99-1.05) | 0.307                 | 1.000   | 1.04 | (1.03-1.06) | 2.0×10-10  | 1.3E-06  | 1.05 |                      |               |
| 14q32.33 | rs10623258  | 14 | 105212261 | CTT/C                                            | 1.01 | (0.98-1.04) | 0.565                 | 1.000   | 1.03 | (1.02-1.04) | 7.9×10-08  | 5.4E-04  | 1.04 | <i>ADSSL1</i>        |               |
| 16p13.3  | rs11076805  | 16 | 4106788   | A/C                                              | 0.99 | (0.94-1.04) | 0.630                 | 1.000   | 0.97 | (0.96-0.98) | 3.2×10-05  | 0.177    | 0.97 | <i>ADCY9</i>         |               |
| 16q12.2  | rs17817449  | 16 | 53813367  | T/G                                              | 1.07 | (1.03-1.11) | 6.2×10 <sup>-4</sup>  | 0.805   | 1.06 | (1.05-1.07) | 5.4×10-24  | 1.8E-20  | 1.06 | <i>FTO</i>           |               |
| 16q12.2  | rs11075995  | 16 | 53855291  | A/T                                              | 1.05 | (1.02-1.08) | 9.2×10 <sup>-4</sup>  | 0.861   | 1.04 | (1.03-1.06) | 3.2×10-11  | 2.2E-07  | 1.04 | <i>FTO</i>           |               |
| 16q12.2  | rs28539243  | 16 | 54682064  | A/G                                              | 1.03 | (1.01-1.06) | 0.018                 | 0.992   | 1.05 | (1.04-1.06) | 1.1×10-15  | 7.2E-12  | 1.05 | <i>AMFR</i>          |               |
| 16q13    | rs2432539   | 16 | 56420987  | A/G                                              | 1.05 | (1.02-1.08) | 0.001                 | 0.880   | 1.04 | (1.03-1.05) | 2.7×10-10  | 1.7E-06  | 1.04 |                      |               |
| 16q23.2  | rs13329835  | 16 | 80650805  | A/G                                              | 0.93 | (0.88-0.99) | 0.017                 | 0.991   | 0.92 | (0.91-0.94) | 2.9×10-28  | 9.6E-25  | 0.92 | <i>CDYL2</i>         |               |
| 16q24.2  | rs4496150   | 16 | 87085237  | A/C                                              | 0.96 | (0.94-0.99) | 0.007                 | 0.980   | 0.96 | (0.95-0.97) | 1.9×10-10  | 1.3E-06  | 0.96 | <i>ATAD5</i>         |               |
| 17q11.2  | rs146699004 | 17 | 29230520  | G/GGT                                            | 0.96 | (0.91-1.01) | 0.095                 | 0.998   | 0.96 | (0.95-0.97) | 5.6×10-10  | 3.8E-06  | 0.96 |                      |               |
| 17q22    | rs2787486   | 17 | 53209774  | A/C                                              | 1.08 | (1.05-1.12) | 4.7×10 <sup>-7</sup>  | 3.2E-03 | 1.08 | (1.07-1.09) | 2.1×10-34  | 7.0E-31  | 1.08 |                      |               |

|          |             |    |          |      |      |             |                      |       |      |             |                       |         |      |                        |
|----------|-------------|----|----------|------|------|-------------|----------------------|-------|------|-------------|-----------------------|---------|------|------------------------|
| 17q25.3  | rs745570    | 17 | 77781725 | A/G  | 1.03 | (1.00-1.06) | 0.026                | 0.994 | 1.04 | (1.03-1.05) | 3.3×10 <sup>-11</sup> | 2.1E-07 | 1.04 |                        |
| 18q11.2  | rs527616    | 18 | 24337424 | C/G  | 0.97 | (0.94-1.00) | 0.022                | 0.993 | 0.95 | (0.94-0.96) | 7.7×10 <sup>-16</sup> | 5.5E-12 | 0.95 |                        |
| 18q11.2  | rs1436904   | 18 | 24570667 | T/G  | 1.03 | (1.01-1.06) | 0.015                | 0.990 | 1.05 | (1.04-1.06) | 7.8×10 <sup>-16</sup> | 5.2E-12 | 1.05 | <i>CHST9</i>           |
| 18q12.1  | rs36194942  | 18 | 25401204 | A/AT | 1.01 | (0.98-1.04) | 0.468                | 1.000 | 1.03 | (1.02-1.04) | 2.7×10 <sup>-06</sup> | 0.017   | 1.03 | <i>CDH2</i>            |
| 18q12.1  | rs117618124 | 18 | 29977689 | T/C  | 0.93 | (0.69-1.24) | 0.604                | 1.000 | 1.11 | (1.08-1.15) | 1.1×10 <sup>-11</sup> | 7.3E-08 | 1.11 | <i>GAREM1</i>          |
| 18q12.3  | rs6507583   | 18 | 42399590 | A/G  | 1.06 | (1.02-1.10) | 0.006                | 0.974 | 1.08 | (1.06-1.11) | 9.7×10 <sup>-14</sup> | 6.6E-10 | 1.09 | <i>SETBP1</i>          |
| 19p13.2  | rs322144    | 19 | 11423703 | C/G  | 1.01 | (0.98-1.05) | 0.488                | 1.000 | 1.02 | (1.01-1.04) | 2.1×10 <sup>-04</sup> | 5.8E-01 | 1.03 | <i>TSPAN16</i>         |
| 19p13.12 | rs2594714   | 19 | 13954571 | A/G  | 0.96 | (0.93-0.99) | 0.009                | 0.984 | 0.96 | (0.95-0.97) | 3.8×10 <sup>-10</sup> | 2.5E-06 | 0.96 |                        |
| 19p13.11 | rs4808801   | 19 | 18571141 | A/G  | 1.06 | (1.03-1.09) | 1.5×10 <sup>-4</sup> | 0.495 | 1.07 | (1.06-1.08) | 2.3×10 <sup>-31</sup> | 7.7E-28 | 1.07 | <i>ELL</i>             |
| 19p13.11 | rs2965183   | 19 | 19545696 | A/G  | 1.02 | (0.99-1.05) | 0.180                | 0.999 | 1.04 | (1.03-1.05) | 9.8×10 <sup>-12</sup> | 6.7E-08 | 1.05 | <i>GATAD2A, MIR640</i> |
| 19q12    | rs113701136 | 19 | 30277729 | T/C  | 1.02 | (0.99-1.06) | 0.178                | 0.999 | 1.02 | (1.01-1.03) | 5.6×10 <sup>-04</sup> | 0.785   | 1.02 | <i>CCNE1</i>           |
| 19q13.31 | rs3760982   | 19 | 44286513 | A/G  | 0.99 | (0.96-1.03) | 0.746                | 1.000 | 1.05 | (1.03-1.06) | 1.6×10 <sup>-14</sup> | 1.1E-10 | 1.05 | <i>KCCN4, LYPD5</i>    |
| 19q13.22 | rs71338792  | 19 | 46183031 | A/AT | 0.96 | (0.92-0.99) | 0.022                | 0.993 | 0.95 | (0.94-0.97) | 2.7×10 <sup>-10</sup> | 1.8E-06 | 0.95 | <i>GIPR</i>            |
| 20q11.22 | rs2284378   | 20 | 32588095 | T/C  | 0.99 | (0.95-1.02) | 0.392                | 1.000 | 1.01 | (1.00-1.02) | 8.8×10 <sup>-02</sup> | 0.998   | 1.01 | <i>RALY</i>            |
| 20q13.13 | rs6122906   | 20 | 48945911 | A/G  | 0.97 | (0.94-1.00) | 0.029                | 0.995 | 0.95 | (0.94-0.97) | 3.7×10 <sup>-11</sup> | 2.4E-07 | 0.95 |                        |
| 21q21.1  | rs2823093   | 21 | 16520832 | A/G  | 0.94 | (0.87-1.00) | 0.056                | 0.997 | 0.94 | (0.92-0.95) | 1.7×10 <sup>-21</sup> | 5.6E-18 | 0.94 | <i>NRIP1</i>           |
| 22q13.1  | rs738321    | 22 | 38568833 | C/G  | 1.03 | (1.00-1.06) | 0.087                | 0.998 | 1.05 | (1.03-1.06) | 7.2×10 <sup>-14</sup> | 4.8E-10 | 1.05 | <i>PLA2G6</i>          |
| 22q13.1  | rs6001930   | 22 | 40876234 | T/C  | 0.95 | (0.92-0.97) | 2.0×10 <sup>-4</sup> | 0.580 | 0.90 | (0.89-0.92) | 5.4×10 <sup>-34</sup> | 1.8E-30 | 0.89 | <i>MKL1</i>            |
| 22q13.31 | rs28512361  | 22 | 46283297 | A/G  | 1.04 | (0.95-1.14) | 0.351                | 1.000 | 1.06 | (1.04-1.08) | 1.4×10 <sup>-08</sup> | 9.4E-05 | 1.06 |                        |

<sup>a</sup>OR literature: The ORs for risk variants identified in Asian populations were extracted from Zheng W et al. Nat Gen 2009, Cai Q et al. Hum Mol Genet. 2011, Long J et al. PLoS Genet. 2012, Cai Q et al. Nat Genet. 2014, and Han MR et al. Hum Mol Genet. 2016

; those identified in European populations were extracted from Michailidou K et al. Nature. 2017

<sup>b</sup>FPRP: The false positive report probability
