# Supplementary material for: Identification of novel breast cancer susceptibility loci in meta-analyses conducted among Asian and European descendants
Source: PubMed Central journal article supplement (PMC7057957; doi:10.1038/s41467-020-15046-w), 2020-03-05
Supplement: 41467_2020_15046_MOESM9_ESM.pdf [file 41467_2020_15046_MOESM9_ESM.pdf]

**Supplementary Data 6. Independent secondary associations found within previously known loci: A conditional analysis**

| SNP        | Adjusted SNP | Loci    | Chr | BP        | EA  | OA | EAF <sub>Asian</sub> | OR (95%CI) <sub>Asian</sub> | P <sub>Asian</sub> | P <sub>Asian+EA</sub> | Direction | Note              |
|------------|--------------|---------|-----|-----------|-----|----|----------------------|-----------------------------|--------------------|-----------------------|-----------|-------------------|
| rs490037   | rs616488     | 1p36.22 | 1   | 10485235  | A   | G  | 0.1599               | 0.92 (0.89-0.96)            | 5.43E-05           | 5.35E-04              | ---+---+  | Secondary signals |
| rs490960   | rs616488     | 1p36.22 | 1   | 10485342  | A   | G  | 0.1613               | 0.92 (0.89-0.96)            | 3.20E-05           | 3.60E-04              | ---+---+  | Secondary signals |
| rs515423   | rs616488     | 1p36.22 | 1   | 10485669  | A   | G  | 0.1599               | 0.92 (0.88-0.95)            | 1.75E-05           | 1.61E-04              | ---+---+  | Secondary signals |
| rs661256   | rs616488     | 1p36.22 | 1   | 10490539  | C   | G  | 0.1606               | 0.92 (0.88-0.95)            | 1.97E-05           | 2.98E-04              | ---+---+  | Secondary signals |
| rs661272   | rs616488     | 1p36.22 | 1   | 10490550  | C   | G  | 0.1612               | 0.92 (0.88-0.95)            | 1.80E-05           | 2.79E-04              | ---+---+  | Secondary signals |
| rs484416   | rs616488     | 1p36.22 | 1   | 10491209  | A   | G  | 0.1625               | 0.92 (0.88-0.96)            | 2.12E-05           | 2.08E-04              | ---+---+  | Secondary signals |
| rs2847336  | rs616488     | 1p36.22 | 1   | 10495110  | T   | C  | 0.1633               | 0.92 (0.89-0.96)            | 2.54E-05           | 2.31E-04              | ---+---+  | Secondary signals |
| rs676995   | rs616488     | 1p36.22 | 1   | 10498453  | T   | C  | 0.1636               | 0.92 (0.89-0.96)            | 2.09E-05           | 1.67E-04              | ---+---+  | Secondary signals |
| rs589400   | rs616488     | 1p36.22 | 1   | 10561282  | G   | A  | 0.8237               | 1.09 (1.04-1.13)            | 3.31E-05           | 4.54E-03              | +++++++   | Secondary signals |
| rs2480784  | rs616488     | 1p36.22 | 1   | 10570721  | A   | G  | 0.1517               | 0.91 (0.87-0.95)            | 6.65E-06           | 2.86E-07              | -----     | Secondary signals |
| rs1411402  | rs616488     | 1p36.22 | 1   | 10579545  | T   | G  | 0.1812               | 0.91 (0.88-0.94)            | 9.19E-07           | 3.10E-03              | -----     | Better signals    |
| rs2483677  | rs616488     | 1p36.22 | 1   | 10580891  | T   | C  | 0.1812               | 0.91 (0.88-0.95)            | 1.19E-06           | 3.02E-03              | -----     | Better signals    |
| rs2506885  | rs616488     | 1p36.22 | 1   | 10581051  | T   | A  | 0.757                | 1.09 (1.05-1.13)            | 5.92E-06           | 2.06E-05              | +++++++   | Secondary signals |
| rs2056417  | rs616488     | 1p36.22 | 1   | 10581658  | A   | G  | 0.1812               | 0.91 (0.87-0.94)            | 6.27E-07           | 6.02E-03              | -----     | Better signals    |
| rs2480782  | rs616488     | 1p36.22 | 1   | 10593296  | T   | G  | 0.152                | 0.91 (0.88-0.95)            | 8.67E-06           | 6.30E-07              | -----     | Secondary signals |
| rs2026792  | rs616488     | 1p36.22 | 1   | 10594790  | G   | A  | 0.8182               | 1.10 (1.06-1.14)            | 1.78E-06           | 3.52E-04              | +++++++   | Better signals    |
| rs2506889  | rs616488     | 1p36.22 | 1   | 10596022  | T   | C  | 0.1816               | 0.91 (0.88-0.95)            | 1.27E-06           | 5.95E-04              | -----     | Better signals    |
| rs12375    | rs616488     | 1p36.22 | 1   | 10596341  | T   | C  | 0.1818               | 0.91 (0.88-0.95)            | 1.39E-06           | 6.67E-04              | -----     | Better signals    |
| rs2480777  | rs616488     | 1p36.22 | 1   | 10597551  | T   | C  | 0.1818               | 0.91 (0.88-0.95)            | 1.57E-06           | 7.49E-04              | -----     | Better signals    |
| rs2506892  | rs616488     | 1p36.22 | 1   | 10598216  | A   | G  | 0.1815               | 0.91 (0.88-0.95)            | 1.46E-06           | 6.70E-04              | -----     | Better signals    |
| rs2150038  | rs616488     | 1p36.22 | 1   | 10609973  | T   | G  | 0.1814               | 0.91 (0.88-0.95)            | 1.34E-06           | 8.33E-04              | +-----    | Better signals    |
| rs9430149  | rs616488     | 1p36.22 | 1   | 10612820  | C   | G  | 0.1812               | 0.91 (0.88-0.94)            | 8.94E-07           | 4.96E-04              | +-----    | Better signals    |
| rs67488812 | rs616488     | 1p36.22 | 1   | 10614804  | G   | A  | 0.8186               | 1.10 (1.06-1.14)            | 1.08E-06           | 5.48E-04              | +++++++   | Better signals    |
| rs17035305 | rs616488     | 1p36.22 | 1   | 10616505  | A   | C  | 0.1815               | 0.91 (0.88-0.95)            | 2.30E-06           | 6.09E-04              | -----     | Better signals    |
| rs12028449 | rs616488     | 1p36.22 | 1   | 10617034  | A   | G  | 0.1811               | 0.91 (0.88-0.95)            | 1.24E-06           | 6.66E-04              | +-----    | Better signals    |
| rs11121587 | rs616488     | 1p36.22 | 1   | 10618109  | G   | A  | 0.8184               | 1.10 (1.06-1.14)            | 1.01E-06           | 4.92E-04              | +++++++   | Better signals    |
| rs4846235  | rs616488     | 1p36.22 | 1   | 10632235  | T   | C  | 0.1812               | 0.91 (0.88-0.94)            | 9.15E-07           | 6.87E-04              | +-----    | Better signals    |
| rs7567444  | rs71801447   | 2q13    | 2   | 111863438 | T   | C  | 0.5116               | 1.07 (1.03-1.1)             | 9.06E-05           | 2.79E-01              | +++++???  | Better signals    |
| rs2015454  | rs71801447   | 2q13    | 2   | 111872148 | A   | G  | 0.5132               | 1.07 (1.04-1.11)            | 4.18E-05           | 2.54E-01              | +++++???  | Better signals    |
| rs4848393  | rs71801447   | 2q13    | 2   | 111877297 | T   | C  | 0.513                | 1.07 (1.03-1.1)             | 6.84E-05           | 2.21E-01              | +++++???  | Better signals    |
| rs2241845  | rs71801447   | 2q13    | 2   | 111879100 | A   | G  | 0.5133               | 1.07 (1.04-1.1)             | 5.29E-05           | 2.38E-01              | +++++???  | Better signals    |
| rs6758181  | rs71801447   | 2q13    | 2   | 111886914 | C   | T  | 0.4873               | 0.94 (0.91-0.97)            | 9.61E-05           | 2.16E-01              | +----???  | Better signals    |
| rs4849417  | rs71801447   | 2q13    | 2   | 111887703 | T   | A  | 0.4867               | 0.94 (0.91-0.97)            | 7.85E-05           | 2.61E-01              | +----???  | Better signals    |
| rs6746608  | rs71801447   | 2q13    | 2   | 111892984 | A   | G  | 0.5137               | 1.07 (1.03-1.1)             | 9.32E-05           | 2.34E-01              | +++++???  | Better signals    |
| rs6750599  | rs71801447   | 2q13    | 2   | 111893869 | A   | T  | 0.5138               | 1.07 (1.03-1.1)             | 6.14E-05           | 2.02E-01              | +++++???  | Better signals    |
| rs13396983 | rs71801447   | 2q13    | 2   | 111900598 | A   | G  | 0.5136               | 1.07 (1.03-1.1)             | 9.51E-05           | 2.01E-01              | +++++???  | Better signals    |
| rs1980045  | rs71801447   | 2q13    | 2   | 111904541 | A   | G  | 0.5127               | 1.07 (1.03-1.1)             | 5.88E-05           | 5.88E-05              | +++++???  | Better signals    |
| rs36018702 | rs71801447   | 2q13    | 2   | 111928373 | A   | C  | 0.5136               | 1.07 (1.03-1.1)             | 9.93E-05           | 2.07E-01              | +++++???  | Better signals    |
| rs78296102 | rs4849887    | 2q14.1  | 2   | 121206308 | T   | C  | 0.9592               | 0.8 (0.74-0.87)             | 4.02E-07           | 4.02E-07              | -----?    | Better signals    |
| rs10624353 | rs34207738   | 3q23    | 3   | 141074870 | ACT | A  | 0.6594               | 0.94 (0.91-0.97)            | 8.42E-05           | 1.44E-02              | -----?    | Better signals    |
| rs1863868  | rs34207738   | 3q23    | 3   | 141087623 | C   | T  | 0.6546               | 0.94 (0.91-0.96)            | 1.62E-05           | 9.10E-03              | -----?    | Better signals    |
| rs7624084  | rs34207738   | 3q23    | 3   | 141093285 | C   | T  | 0.6457               | 0.93 (0.9-0.96)             | 5.00E-06           | 1.35E-01              | -----?    | Better signals    |
| rs6440003  | rs34207738   | 3q23    | 3   | 141094209 | A   | G  | 0.3479               | 1.07 (1.04-1.11)            | 5.01E-06           | 4.43E-01              | +++++++   | Better signals    |
| rs4683605  | rs34207738   | 3q23    | 3   | 141094769 | A   | C  | 0.3348               | 1.06 (1.03-1.1)             | 8.67E-05           | 6.65E-01              | +++++++   | Better signals    |
| rs6764769  | rs34207738   | 3q23    | 3   | 141100280 | G   | A  | 0.6522               | 0.93 (0.9-0.96)             | 6.54E-06           | 3.18E-01              | -----?    | Better signals    |
| rs6763931  | rs34207738   | 3q23    | 3   | 141102833 | A   | G  | 0.3471               | 1.07 (1.04-1.1)             | 7.47E-06           | 4.45E-01              | +++++++   | Better signals    |

|                         |             |         |   |           |    |                |        |                  |          |          |             |                |
|-------------------------|-------------|---------|---|-----------|----|----------------|--------|------------------|----------|----------|-------------|----------------|
| rs724016                | rs34207738  | 3q23    | 3 | 141105570 | G  | A              | 0.6582 | 0.93 (0.91-0.96) | 1.02E-05 | 1.02E-05 | -----??     | Better signals |
| rs7632381               | rs34207738  | 3q23    | 3 | 141106063 | C  | T              | 0.6546 | 0.94 (0.91-0.97) | 2.58E-05 | 2.58E-05 | -----??     | Better signals |
| rs4683606               | rs34207738  | 3q23    | 3 | 141110074 | G  | A              | 0.6548 | 0.94 (0.91-0.96) | 1.86E-05 | 1.86E-05 | -----??     | Better signals |
| rs34466132              | rs34207738  | 3q23    | 3 | 141117969 | CT | C              | 0.3258 | 1.07 (1.04-1.1)  | 2.68E-05 | 3.16E-01 | +++++++?+   | Better signals |
| rs13068733              | rs34207738  | 3q23    | 3 | 141118028 | G  | A              | 0.6545 | 0.94 (0.91-0.97) | 2.19E-05 | 2.19E-05 | -----??     | Better signals |
| rs2871960               | rs34207738  | 3q23    | 3 | 141121814 | C  | A              | 0.6542 | 0.94 (0.91-0.97) | 3.46E-05 | 3.46E-05 | -----??     | Better signals |
| rs1344674               | rs34207738  | 3q23    | 3 | 141125186 | G  | A              | 0.6538 | 0.94 (0.91-0.97) | 2.66E-05 | 3.78E-01 | -----??     | Better signals |
| rs1344672               | rs34207738  | 3q23    | 3 | 141125705 | G  | C              | 0.6543 | 0.94 (0.91-0.97) | 2.59E-05 | 4.01E-01 | -----?-     | Better signals |
| rs6763927               | rs34207738  | 3q23    | 3 | 141140366 | T  | A              | 0.6534 | 0.94 (0.91-0.97) | 3.88E-05 | 2.88E-01 | -----?-     | Better signals |
| rs6440006               | rs34207738  | 3q23    | 3 | 141142691 | A  | G              | 0.3488 | 1.07 (1.04-1.1)  | 2.72E-05 | 6.69E-02 | +++++++?+   | Better signals |
| rs7650602               | rs34207738  | 3q23    | 3 | 141147414 | C  | T              | 0.6539 | 0.94 (0.91-0.97) | 2.60E-05 | 6.05E-02 | -----?-     | Better signals |
| rs7625643               | rs34207738  | 3q23    | 3 | 141150026 | G  | A              | 0.6536 | 0.94 (0.91-0.96) | 1.71E-05 | 7.66E-02 | -----?-     | Better signals |
| rs6440008               | rs34207738  | 3q23    | 3 | 141154542 | C  | T              | 0.6956 | 0.93 (0.9-0.96)  | 7.57E-06 | 2.38E-01 | -----?-     | Better signals |
| rs9878347               | rs34207738  | 3q23    | 3 | 141169982 | C  | A              | 0.6531 | 0.93 (0.9-0.96)  | 5.00E-07 | 2.10E-04 | -----?-     | Better signals |
| rs9879503               | rs34207738  | 3q23    | 3 | 141170661 | G  | A              | 0.654  | 0.93 (0.9-0.96)  | 4.98E-07 | 1.84E-04 | -----?-     | Better signals |
| rs1863867               | rs34207738  | 3q23    | 3 | 141175620 | C  | A              | 0.6589 | 0.93 (0.91-0.96) | 2.79E-06 | 2.25E-04 | -----?-     | Better signals |
| rs2312193               | rs34207738  | 3q23    | 3 | 141188399 | C  | T              | 0.7319 | 0.92 (0.9-0.95)  | 7.50E-07 | 3.84E-03 | -----?-     | Better signals |
| rs3806646               | rs34207738  | 3q23    | 3 | 141204844 | C  | G              | 0.314  | 1.08 (1.05-1.11) | 2.49E-07 | 5.30E-05 | +++++++?+   | Better signals |
| rs3821712               | rs34207738  | 3q23    | 3 | 141205185 | T  | C              | 0.3388 | 1.08 (1.05-1.11) | 4.10E-07 | 5.36E-05 | +++++++?+   | Better signals |
| rs11917587              | rs34207738  | 3q23    | 3 | 141207575 | A  | G              | 0.3392 | 1.08 (1.04-1.11) | 9.51E-07 | 3.14E-04 | +++++++?+   | Better signals |
| rs7643837               | rs34207738  | 3q23    | 3 | 141209867 | C  | T              | 0.6605 | 0.93 (0.9-0.96)  | 7.11E-07 | 5.67E-05 | -----?-     | Better signals |
| rs9813177               | rs34207738  | 3q23    | 3 | 141212518 | G  | A              | 0.6635 | 0.93 (0.9-0.96)  | 8.57E-07 | 6.44E-05 | -----?-     | Better signals |
| rs6795168               | rs34207738  | 3q23    | 3 | 141213581 | A  | T              | 0.3364 | 1.08 (1.04-1.11) | 9.02E-07 | 7.18E-05 | +++++++?+   | Better signals |
| rs6806837               | rs34207738  | 3q23    | 3 | 141217954 | C  | T              | 0.6618 | 0.93 (0.9-0.96)  | 6.21E-07 | 4.43E-05 | -----?-     | Better signals |
| rs6763498               | rs34207738  | 3q23    | 3 | 141218568 | A  | T              | 0.3357 | 1.08 (1.04-1.11) | 8.77E-07 | 6.17E-05 | +++++++?+   | Better signals |
| rs6767158               | rs34207738  | 3q23    | 3 | 141228874 | T  | C              | 0.3356 | 1.08 (1.04-1.11) | 1.01E-06 | 5.83E-05 | +++++++?+   | Better signals |
| rs13069717              | rs34207738  | 3q23    | 3 | 141234523 | C  | T              | 0.6616 | 0.93 (0.9-0.96)  | 8.39E-07 | 4.83E-05 | -----?-     | Better signals |
| rs35711802              | rs34207738  | 3q23    | 3 | 141236524 | C  | G              | 0.3386 | 1.08 (1.05-1.11) | 7.63E-07 | 4.95E-05 | +++++++?+   | Better signals |
| rs6785874               | rs34207738  | 3q23    | 3 | 141244816 | A  | G              | 0.3344 | 1.08 (1.04-1.11) | 8.92E-07 | 6.12E-05 | +++++++?+   | Better signals |
| rs6800122               | rs34207738  | 3q23    | 3 | 141249398 | T  | C              | 0.3366 | 1.08 (1.04-1.11) | 8.32E-07 | 5.05E-05 | +++++++?+   | Better signals |
| rs9835593               | rs34207738  | 3q23    | 3 | 141263990 | A  | G              | 0.338  | 1.08 (1.05-1.11) | 6.80E-07 | 5.16E-05 | +++++++?+   | Better signals |
| rs6776003               | rs34207738  | 3q23    | 3 | 141266493 | A  | G              | 0.3385 | 1.08 (1.05-1.11) | 8.41E-07 | 2.85E-04 | +++++++?+   | Better signals |
| rs11711375              | rs34207738  | 3q23    | 3 | 141287539 | G  | A              | 0.6612 | 0.93 (0.9-0.96)  | 4.87E-07 | 5.50E-05 | -----?-     | Better signals |
| rs1493209               | rs34207738  | 3q23    | 3 | 141292618 | A  | G              | 0.3358 | 1.08 (1.05-1.11) | 6.08E-07 | 6.55E-05 | +++++++?+   | Better signals |
| rs3821710               | rs34207738  | 3q23    | 3 | 141301451 | A  | G              | 0.3354 | 1.08 (1.05-1.11) | 4.59E-07 | 4.81E-05 | +++++++?+   | Better signals |
| rs6440013               | rs34207738  | 3q23    | 3 | 141304571 | G  | A              | 0.6621 | 0.93 (0.9-0.96)  | 5.58E-07 | 5.48E-05 | -----?-     | Better signals |
| rs11916906              | rs34207738  | 3q23    | 3 | 141314133 | T  | A              | 0.661  | 0.93 (0.9-0.96)  | 5.22E-07 | 6.72E-05 | -----?-     | Better signals |
| 3:141320284:CAAAAAAAAAA | rs34207738  | 3q23    | 3 | 141320284 | CA | CAAAAAAAAAAGAA | 0.3107 | 1.08 (1.05-1.11) | 1.87E-06 | 1.87E-06 | +++++++???  | Better signals |
| rs295320                | rs34207738  | 3q23    | 3 | 141324556 | G  | A              | 0.6602 | 0.93 (0.9-0.95)  | 2.32E-07 | 4.78E-05 | -----?-     | Better signals |
| rs295322                | rs34207738  | 3q23    | 3 | 141326602 | C  | T              | 0.738  | 0.92 (0.9-0.95)  | 3.69E-07 | 5.91E-07 | -----?-     | Better signals |
| rs295323                | rs34207738  | 3q23    | 3 | 141327474 | A  | G              | 0.3391 | 1.08 (1.05-1.11) | 4.21E-07 | 4.79E-05 | +++++++?+   | Better signals |
| rs2172471               | rs34207738  | 3q23    | 3 | 141331222 | A  | G              | 0.3384 | 1.08 (1.05-1.11) | 3.93E-07 | 4.75E-05 | +++++++?+   | Better signals |
| rs6440015               | rs34207738  | 3q23    | 3 | 141336351 | T  | G              | 0.3381 | 1.08 (1.05-1.11) | 4.67E-07 | 1.45E-04 | +++++++?+   | Better signals |
| rs2639998               | rs34207738  | 3q23    | 3 | 141336708 | T  | A              | 0.6609 | 0.93 (0.9-0.96)  | 5.99E-07 | 1.63E-04 | -----?-     | Better signals |
| rs10589233              | rs34207738  | 3q23    | 3 | 141336832 | A  | AAG            | 0.3131 | 1.08 (1.05-1.12) | 2.58E-07 | 6.06E-05 | +++++++?+   | Better signals |
| rs55813385              | rs34207738  | 3q23    | 3 | 141336835 | T  | A              | 0.6867 | 0.92 (0.9-0.95)  | 2.52E-07 | 1.37E-04 | -----?-     | Better signals |
| rs11746538              | rs116095464 | 5p15.33 | 5 | 427466    | A  | C              | 0.4931 | 0.93 (0.9-0.96)  | 1.05E-05 | 7.38E-01 | ---?-?+?    | Better signals |
| rs349577                | rs116095464 | 5p15.33 | 5 | 445726    | G  | C              | 0.5062 | 1.07 (1.04-1.11) | 9.35E-06 | 6.63E-01 | +++?++?+?   | Better signals |
| rs74626386              | rs62355902  | 5q11.2  | 5 | 55990052  | T  | G              | 0.1183 | 1.12 (1.07-1.17) | 5.56E-07 | 2.24E-06 | +-----?+++  | Better signals |
| rs79299334              | rs62355902  | 5q11.2  | 5 | 55991699  | A  | G              | 0.1343 | 1.13 (1.08-1.17) | 3.28E-08 | 9.44E-09 | +++++++?+++ | Better signals |

|             |            |        |   |          |    |     |        |                  |          |          |            |                |
|-------------|------------|--------|---|----------|----|-----|--------|------------------|----------|----------|------------|----------------|
| rs77367410  | rs62355902 | 5q11.2 | 5 | 55992290 | G  | A   | 0.8596 | 0.89 (0.85-0.93) | 3.25E-08 | 5.03E-09 | -----?---  | Better signals |
| rs6877066   | rs62355902 | 5q11.2 | 5 | 55993813 | C  | T   | 0.8639 | 0.89 (0.85-0.93) | 4.58E-08 | 2.18E-08 | -----?---  | Better signals |
| rs16886113  | rs62355902 | 5q11.2 | 5 | 55995035 | G  | T   | 0.8564 | 0.89 (0.86-0.93) | 3.91E-08 | 6.21E-09 | -----?---  | Better signals |
| rs74773564  | rs62355902 | 5q11.2 | 5 | 55995869 | T  | C   | 0.1297 | 1.13 (1.08-1.18) | 3.40E-08 | 7.97E-09 | ++++++?+++ | Better signals |
| rs73756771  | rs62355902 | 5q11.2 | 5 | 56001002 | G  | C   | 0.8852 | 0.85 (0.81-0.89) | 8.11E-11 | 1.69E-12 | -----?--?  | Better signals |
| rs75433101  | rs62355902 | 5q11.2 | 5 | 56002070 | A  | T   | 0.1148 | 1.17 (1.12-1.23) | 9.08E-11 | 2.86E-13 | ++++++?+?+ | Better signals |
| rs73756772  | rs62355902 | 5q11.2 | 5 | 56002136 | C  | G   | 0.1149 | 1.17 (1.12-1.23) | 8.91E-11 | 1.21E-13 | ++++++?+?+ | Better signals |
| rs73756773  | rs62355902 | 5q11.2 | 5 | 56002851 | A  | T   | 0.1149 | 1.17 (1.12-1.23) | 8.49E-11 | 1.34E-13 | ++++++?+?+ | Better signals |
| rs55878836  | rs62355902 | 5q11.2 | 5 | 56004565 | G  | C   | 0.8851 | 0.85 (0.81-0.89) | 8.79E-11 | 1.36E-13 | -----?--?  | Better signals |
| rs113465266 | rs62355902 | 5q11.2 | 5 | 56004872 | C  | CA  | 0.8852 | 0.85 (0.81-0.9)  | 9.87E-11 | 3.90E-13 | -----?--?  | Better signals |
| rs57841600  | rs62355902 | 5q11.2 | 5 | 56005065 | G  | A   | 0.8851 | 0.85 (0.81-0.9)  | 8.85E-11 | 1.36E-13 | -----?--?  | Better signals |
| rs60588964  | rs62355902 | 5q11.2 | 5 | 56006008 | C  | A   | 0.8852 | 0.85 (0.81-0.9)  | 9.02E-11 | 1.37E-13 | -----?--?  | Better signals |
| rs115302578 | rs62355902 | 5q11.2 | 5 | 56006345 | A  | G   | 0.1191 | 1.17 (1.12-1.23) | 8.35E-11 | 1.18E-13 | ++++++?+?+ | Better signals |
| rs111944656 | rs62355902 | 5q11.2 | 5 | 56008230 | T  | G   | 0.1148 | 1.17 (1.12-1.23) | 1.12E-10 | 2.99E-13 | ++++++?+?+ | Better signals |
| rs112191071 | rs62355902 | 5q11.2 | 5 | 56008241 | A  | G   | 0.1148 | 1.17 (1.12-1.23) | 1.12E-10 | 2.81E-13 | ++++++?+?+ | Better signals |
| rs6883200   | rs62355902 | 5q11.2 | 5 | 56010025 | G  | C   | 0.8852 | 0.85 (0.81-0.9)  | 1.48E-10 | 3.58E-13 | -----?--?  | Better signals |
| rs68115105  | rs62355902 | 5q11.2 | 5 | 56011234 | T  | G   | 0.4537 | 1.07 (1.04-1.1)  | 8.46E-06 | 2.50E-11 | ++++++?+++ | Better signals |
| rs73756777  | rs62355902 | 5q11.2 | 5 | 56011236 | T  | G   | 0.1395 | 1.15 (1.1-1.2)   | 3.14E-09 | 3.14E-09 | ++++++?+?? | Better signals |
| rs113803454 | rs62355902 | 5q11.2 | 5 | 56012282 | T  | TC  | 0.1159 | 1.17 (1.12-1.23) | 7.43E-11 | 3.65E-13 | ++++++?+?+ | Better signals |
| rs111872579 | rs62355902 | 5q11.2 | 5 | 56012629 | TA | T   | 0.8847 | 0.85 (0.81-0.9)  | 1.45E-10 | 6.99E-13 | -----?--?  | Better signals |
| rs73756780  | rs62355902 | 5q11.2 | 5 | 56013798 | A  | T   | 0.1572 | 1.13 (1.08-1.18) | 4.59E-08 | 1.46E-12 | ++++++?+?+ | Better signals |
| rs189669878 | rs62355902 | 5q11.2 | 5 | 56013985 | A  | T   | 0.9618 | 0.78 (0.71-0.85) | 6.71E-09 | 6.71E-09 | -----???   | Better signals |
| rs200520587 | rs62355902 | 5q11.2 | 5 | 56020509 | GT | GTT | 0.8836 | 0.86 (0.82-0.91) | 2.43E-08 | 2.43E-08 | -----????  | Better signals |
| rs112476198 | rs62355902 | 5q11.2 | 5 | 56020572 | C  | T   | 0.8853 | 0.85 (0.81-0.89) | 5.60E-11 | 2.68E-14 | -----?--?  | Better signals |
| rs79488097  | rs62355902 | 5q11.2 | 5 | 56022251 | C  | T   | 0.8854 | 0.85 (0.81-0.89) | 5.70E-11 | 2.71E-14 | -----?--?  | Better signals |
| rs16886164  | rs62355902 | 5q11.2 | 5 | 56022907 | A  | G   | 0.1142 | 1.18 (1.12-1.24) | 3.83E-11 | 4.29E-14 | ++++++?+?+ | Better signals |
| rs76482628  | rs62355902 | 5q11.2 | 5 | 56025682 | A  | G   | 0.1088 | 1.2 (1.14-1.26)  | 2.04E-13 | 1.14E-14 | ++++++?+?+ | Better signals |
| rs59957907  | rs62355902 | 5q11.2 | 5 | 56027240 | G  | A   | 0.6106 | 0.94 (0.92-0.97) | 3.00E-05 | 3.00E-05 | -----+++?  | Better signals |
| rs138805815 | rs62355902 | 5q11.2 | 5 | 56027591 | T  | C   | 0.1101 | 1.21 (1.15-1.27) | 7.23E-14 | 7.05E-15 | ++++++?+?+ | Better signals |
| rs11285405  | rs62355902 | 5q11.2 | 5 | 56037627 | CA | C   | 0.6842 | 0.93 (0.9-0.96)  | 2.26E-06 | 2.13E-01 | -----?--?  | Better signals |
| rs77961606  | rs62355902 | 5q11.2 | 5 | 56040643 | C  | T   | 0.8891 | 0.83 (0.79-0.87) | 6.01E-14 | 1.85E-15 | +-----?--? | Better signals |
| rs76250845  | rs62355902 | 5q11.2 | 5 | 56042972 | T  | C   | 0.1097 | 1.21 (1.15-1.27) | 4.76E-14 | 2.23E-15 | ++++++?+?+ | Better signals |
| rs16886218  | rs62355902 | 5q11.2 | 5 | 56044486 | T  | G   | 0.1098 | 1.21 (1.15-1.27) | 5.51E-14 | 1.83E-15 | ++++++?+?+ | Better signals |
| rs78591923  | rs62355902 | 5q11.2 | 5 | 56044507 | A  | G   | 0.1097 | 1.21 (1.15-1.27) | 5.05E-14 | 3.53E-15 | ++++++?+?+ | Better signals |
| rs16886220  | rs62355902 | 5q11.2 | 5 | 56044508 | A  | T   | 0.1098 | 1.21 (1.15-1.27) | 5.52E-14 | 1.83E-15 | ++++++?+?+ | Better signals |
| rs73131777  | rs62355902 | 5q11.2 | 5 | 56044903 | T  | C   | 0.1097 | 1.21 (1.15-1.27) | 5.81E-14 | 3.35E-15 | ++++++?+?+ | Better signals |
| rs113417697 | rs62355902 | 5q11.2 | 5 | 56045795 | G  | GA  | 0.1122 | 1.21 (1.15-1.27) | 5.08E-14 | 1.16E-12 | ++++++?+?+ | Better signals |
| rs73131786  | rs62355902 | 5q11.2 | 5 | 56046256 | C  | A   | 0.8904 | 0.83 (0.79-0.87) | 5.01E-14 | 2.91E-15 | +-----?--? | Better signals |
| rs56793118  | rs62355902 | 5q11.2 | 5 | 56046399 | C  | T   | 0.8904 | 0.83 (0.79-0.87) | 5.06E-14 | 3.45E-15 | +-----?--? | Better signals |
| rs79957360  | rs62355902 | 5q11.2 | 5 | 56046461 | T  | C   | 0.1096 | 1.21 (1.15-1.27) | 5.07E-14 | 2.93E-15 | ++++++?+?+ | Better signals |
| rs80146798  | rs62355902 | 5q11.2 | 5 | 56046651 | T  | C   | 0.1096 | 1.21 (1.15-1.27) | 5.09E-14 | 2.75E-15 | ++++++?+?+ | Better signals |
| rs73131789  | rs62355902 | 5q11.2 | 5 | 56047143 | A  | G   | 0.1094 | 1.21 (1.15-1.27) | 7.55E-14 | 3.59E-15 | ++++++?+?+ | Better signals |
| rs80152369  | rs62355902 | 5q11.2 | 5 | 56047342 | A  | C   | 0.1094 | 1.21 (1.15-1.27) | 7.83E-14 | 4.15E-15 | ++++++?+?+ | Better signals |
| rs35605179  | rs62355902 | 5q11.2 | 5 | 56048008 | GA | G   | 0.8773 | 0.84 (0.8-0.88)  | 1.71E-12 | 1.98E-13 | +-----?--? | Better signals |
| rs75499227  | rs62355902 | 5q11.2 | 5 | 56048635 | G  | A   | 0.8903 | 0.83 (0.79-0.87) | 5.83E-14 | 3.70E-15 | +-----?--? | Better signals |
| rs73131801  | rs62355902 | 5q11.2 | 5 | 56051006 | A  | G   | 0.1093 | 1.21 (1.15-1.27) | 6.47E-14 | 4.07E-15 | ++++++?+?+ | Better signals |
| rs79160707  | rs62355902 | 5q11.2 | 5 | 56052938 | T  | C   | 0.1095 | 1.21 (1.15-1.27) | 5.25E-14 | 5.06E-15 | ++++++?+?+ | Better signals |
| rs112776581 | rs62355902 | 5q11.2 | 5 | 56054333 | T  | TA  | 0.1098 | 1.21 (1.15-1.27) | 3.46E-14 | 4.75E-15 | ++++++?+?+ | Better signals |
| rs76485124  | rs62355902 | 5q11.2 | 5 | 56060400 | T  | C   | 0.0985 | 1.21 (1.15-1.27) | 1.12E-12 | 6.11E-12 | ++++++?+?+ | Better signals |
| rs112497245 | rs62355902 | 5q11.2 | 5 | 56060954 | A  | G   | 0.1636 | 1.16 (1.12-1.21) | 5.35E-14 | 9.89E-19 | ++++++?+?+ | Better signals |
| rs78209889  | rs62355902 | 5q11.2 | 5 | 56065572 | C  | T   | 0.8365 | 0.86 (0.83-0.89) | 5.41E-14 | 4.03E-18 | -----?--?  | Better signals |

|                           |            |        |   |          |          |           |        |                  |          |          |           |                |
|---------------------------|------------|--------|---|----------|----------|-----------|--------|------------------|----------|----------|-----------|----------------|
| rs16886272                | rs62355902 | 5q11.2 | 5 | 56067434 | A        | G         | 0.1635 | 1.16 (1.12-1.21) | 1.49E-13 | 1.87E-18 | +++++?+?  | Better signals |
| rs4358485                 | rs62355902 | 5q11.2 | 5 | 56074451 | G        | A         | 0.2442 | 1.08 (1.04-1.11) | 3.93E-06 | 2.04E-01 | +++++++   | Better signals |
| rs6450406                 | rs62355902 | 5q11.2 | 5 | 56076625 | A        | G         | 0.7564 | 0.93 (0.9-0.96)  | 4.04E-06 | 2.01E-01 | -----+    | Better signals |
| rs10461616                | rs62355902 | 5q11.2 | 5 | 56080347 | T        | C         | 0.7616 | 0.93 (0.9-0.96)  | 4.24E-06 | 2.26E-01 | -----+    | Better signals |
| rs10055224                | rs62355902 | 5q11.2 | 5 | 56081201 | T        | C         | 0.762  | 0.93 (0.9-0.96)  | 2.73E-06 | 2.39E-01 | -----+    | Better signals |
| rs10940512                | rs62355902 | 5q11.2 | 5 | 56082094 | G        | C         | 0.244  | 1.08 (1.04-1.11) | 2.98E-06 | 2.28E-01 | +++++?+-  | Better signals |
| rs10471991                | rs62355902 | 5q11.2 | 5 | 56085632 | T        | C         | 0.7562 | 0.93 (0.9-0.96)  | 2.69E-06 | 2.36E-01 | -----+    | Better signals |
| rs10549600                | rs62355902 | 5q11.2 | 5 | 56087731 | GTA      | G         | 0.2328 | 1.09 (1.05-1.12) | 5.54E-07 | 2.05E-01 | +++++?+-  | Better signals |
| rs113317823               | rs62355902 | 5q11.2 | 5 | 56087883 | T        | C         | 0.136  | 1.16 (1.12-1.21) | 1.04E-12 | 1.71E-13 | +++++?+?  | Better signals |
| rs144983009               | rs62355902 | 5q11.2 | 5 | 56087899 | T        | C         | 0.157  | 1.15 (1.1-1.2)   | 8.84E-12 | 2.69E-13 | +++++?+?  | Better signals |
| rs9292122                 | rs62355902 | 5q11.2 | 5 | 56087910 | G        | A         | 0.2536 | 1.08 (1.05-1.12) | 8.62E-07 | 1.19E-01 | +++++?+-  | Better signals |
| rs3309                    | rs62355902 | 5q11.2 | 5 | 56092779 | T        | A         | 0.2657 | 1.08 (1.05-1.11) | 1.75E-06 | 2.95E-01 | +++++?+-  | Better signals |
| rs6888317                 | rs62355902 | 5q11.2 | 5 | 56093307 | G        | A         | 0.273  | 1.08 (1.04-1.11) | 2.34E-06 | 2.77E-01 | +++++?+-  | Better signals |
| rs6870175                 | rs62355902 | 5q11.2 | 5 | 56093371 | A        | G         | 0.7269 | 0.93 (0.9-0.96)  | 2.26E-06 | 2.85E-01 | -----+    | Better signals |
| rs4146565                 | rs62355902 | 5q11.2 | 5 | 56093825 | T        | C         | 0.7283 | 0.93 (0.9-0.96)  | 2.06E-06 | 2.86E-01 | -----+    | Better signals |
| rs2408597                 | rs62355902 | 5q11.2 | 5 | 56098632 | G        | A         | 0.2571 | 1.08 (1.05-1.11) | 1.29E-06 | 2.80E-01 | +++++?+-  | Better signals |
| rs6893754                 | rs62355902 | 5q11.2 | 5 | 56100006 | G        | A         | 0.2573 | 1.08 (1.05-1.11) | 1.40E-06 | 2.84E-01 | +++++?+-  | Better signals |
| rs6862118                 | rs62355902 | 5q11.2 | 5 | 56106474 | G        | A         | 0.249  | 1.08 (1.04-1.11) | 3.56E-06 | 2.31E-01 | +++++?+-  | Better signals |
| 5:56109436:TACAA:ACAA     | rs62355902 | 5q11.2 | 5 | 56109436 | AACAA    | TACAA     | 0.1274 | 1.15 (1.1-1.21)  | 8.57E-10 | 8.57E-10 | +++++???? | Better signals |
| 5:56109723:T:<INS:ME:ALU> | rs62355902 | 5q11.2 | 5 | 56109723 | NS:ME:AL | T         | 0.0911 | 1.16 (1.09-1.25) | 1.06E-05 | 3.07E-08 | +++?+???  | Better signals |
| rs7731700                 | rs62355902 | 5q11.2 | 5 | 56111927 | C        | T         | 0.2392 | 1.08 (1.04-1.11) | 4.29E-06 | 2.25E-01 | +++++?+-  | Better signals |
| rs2591951                 | rs62355902 | 5q11.2 | 5 | 56120770 | T        | A         | 0.4563 | 0.94 (0.92-0.97) | 7.93E-05 | 4.01E-11 | +-----    | Better signals |
| rs16886364                | rs62355902 | 5q11.2 | 5 | 56122344 | G        | A         | 0.8676 | 0.86 (0.83-0.9)  | 1.57E-12 | 7.42E-16 | -----?+-  | Better signals |
| rs79953845                | rs62355902 | 5q11.2 | 5 | 56124794 | C        | G         | 0.1332 | 1.16 (1.11-1.21) | 1.85E-12 | 6.08E-16 | +++++?+?  | Better signals |
| rs111968853               | rs62355902 | 5q11.2 | 5 | 56128939 | T        | C         | 0.1332 | 1.16 (1.11-1.21) | 3.02E-12 | 9.23E-16 | +++++?+?  | Better signals |
| rs76418981                | rs62355902 | 5q11.2 | 5 | 56130534 | G        | T         | 0.8668 | 0.86 (0.83-0.9)  | 3.58E-12 | 1.07E-15 | -----?+-  | Better signals |
| rs16886397                | rs62355902 | 5q11.2 | 5 | 56134276 | G        | A         | 0.8668 | 0.86 (0.83-0.9)  | 3.09E-12 | 1.38E-15 | -----?+-  | Better signals |
| rs77371588                | rs62355902 | 5q11.2 | 5 | 56134560 | G        | T         | 0.9291 | 0.81 (0.77-0.86) | 3.11E-12 | 1.13E-13 | -----?+-  | Better signals |
| rs60590641                | rs62355902 | 5q11.2 | 5 | 56141155 | G        | A         | 0.929  | 0.81 (0.77-0.86) | 2.38E-12 | 1.20E-13 | -----?+-  | Better signals |
| rs16886420                | rs62355902 | 5q11.2 | 5 | 56142999 | T        | C         | 0.1333 | 1.16 (1.11-1.21) | 2.36E-12 | 1.12E-15 | +++++?+?  | Better signals |
| rs60200883                | rs62355902 | 5q11.2 | 5 | 56143217 | C        | A         | 0.8667 | 0.86 (0.83-0.9)  | 2.30E-12 | 8.56E-16 | -----?+-  | Better signals |
| rs199942689               | rs62355902 | 5q11.2 | 5 | 56143929 | CA       | C         | 0.2387 | 1.09 (1.06-1.13) | 1.75E-07 | 1.75E-07 | +++++?+?  | Better signals |
| rs41106                   | rs62355902 | 5q11.2 | 5 | 56145057 | G        | T         | 0.2695 | 1.08 (1.05-1.11) | 6.07E-07 | 3.83E-01 | +++++?+-  | Better signals |
| rs33329                   | rs62355902 | 5q11.2 | 5 | 56145068 | T        | C         | 0.7345 | 0.92 (0.89-0.95) | 2.00E-07 | 2.00E-07 | -----?    | Better signals |
| rs832567                  | rs62355902 | 5q11.2 | 5 | 56152416 | C        | A         | 0.2631 | 1.08 (1.05-1.12) | 5.56E-07 | 3.75E-01 | +++++?+?  | Better signals |
| rs78686102                | rs62355902 | 5q11.2 | 5 | 56152795 | A        | G         | 0.0691 | 1.23 (1.16-1.3)  | 7.05E-12 | 8.31E-13 | +++++?+?  | Better signals |
| rs1017226                 | rs62355902 | 5q11.2 | 5 | 56153392 | C        | T         | 0.8659 | 0.86 (0.82-0.89) | 6.51E-13 | 3.60E-16 | -----?+-  | Better signals |
| rs150755620               | rs62355902 | 5q11.2 | 5 | 56156683 | A        | AAAAAAAAG | 0.1288 | 1.15 (1.1-1.2)   | 1.45E-09 | 2.00E-13 | +++++???? | Better signals |
| rs832573                  | rs62355902 | 5q11.2 | 5 | 56159578 | T        | C         | 0.7593 | 0.92 (0.89-0.95) | 3.48E-07 | 3.48E-01 | -----?+-  | Better signals |
| rs56822906                | rs62355902 | 5q11.2 | 5 | 56165914 | G        | A         | 0.8639 | 0.86 (0.82-0.9)  | 1.30E-12 | 5.24E-16 | -----?+-  | Better signals |
| rs2229882                 | rs62355902 | 5q11.2 | 5 | 56168712 | T        | C         | 0.0695 | 1.22 (1.15-1.3)  | 1.30E-11 | 2.99E-13 | +++++?+?  | Better signals |
| rs16886448                | rs62355902 | 5q11.2 | 5 | 56170813 | G        | C         | 0.8677 | 0.86 (0.82-0.9)  | 1.54E-12 | 1.85E-15 | -----?+-  | Better signals |
| rs9686160                 | rs62355902 | 5q11.2 | 5 | 56172001 | C        | G         | 0.1327 | 1.16 (1.12-1.21) | 1.43E-12 | 5.31E-16 | +++++?+?  | Better signals |
| rs2548663                 | rs62355902 | 5q11.2 | 5 | 56172778 | G        | A         | 0.2375 | 1.09 (1.05-1.12) | 3.85E-07 | 3.75E-01 | +++++?+-  | Better signals |
| rs9687226                 | rs62355902 | 5q11.2 | 5 | 56176446 | T        | C         | 0.1328 | 1.16 (1.12-1.21) | 1.85E-12 | 2.37E-15 | +++++?+?  | Better signals |
| rs702689                  | rs62355902 | 5q11.2 | 5 | 56177443 | G        | A         | 0.2332 | 1.08 (1.05-1.12) | 5.39E-07 | 3.55E-01 | +++++?+?  | Better signals |
| rs3822625                 | rs62355902 | 5q11.2 | 5 | 56178111 | G        | A         | 0.8673 | 0.86 (0.82-0.9)  | 1.13E-12 | 2.66E-15 | -----?+-  | Better signals |
| rs16877026                | rs62355902 | 5q11.2 | 5 | 56184926 | C        | G         | 0.1327 | 1.16 (1.12-1.21) | 1.26E-12 | 6.07E-16 | +++++?+?  | Better signals |
| rs76058858                | rs62355902 | 5q11.2 | 5 | 56186439 | A        | G         | 0.1324 | 1.16 (1.12-1.21) | 1.65E-12 | 8.02E-16 | +++++?+?  | Better signals |
| rs58835146                | rs62355902 | 5q11.2 | 5 | 56186986 | C        | A         | 0.2998 | 1.08 (1.05-1.12) | 2.37E-06 | 8.27E-02 | +++++?+-  | Better signals |
| rs376579643               | rs62355902 | 5q11.2 | 5 | 56193454 | C        | CCTGT     | 0.8615 | 0.86 (0.83-0.9)  | 1.67E-12 | 1.71E-14 | -----?+-  | Better signals |

|             |            |        |   |          |       |       |        |                  |          |          |           |                |
|-------------|------------|--------|---|----------|-------|-------|--------|------------------|----------|----------|-----------|----------------|
| rs77982563  | rs62355902 | 5q11.2 | 5 | 56193667 | T     | C     | 0.1526 | 1.15 (1.11-1.2)  | 4.24E-12 | 1.38E-14 | +++++?+?+ | Better signals |
| rs12655019  | rs62355902 | 5q11.2 | 5 | 56195790 | G     | A     | 0.8459 | 0.87 (0.84-0.9)  | 3.38E-12 | 1.28E-12 | -----?--  | Better signals |
| rs252912    | rs62355902 | 5q11.2 | 5 | 56195792 | C     | T     | 0.2648 | 1.08 (1.04-1.11) | 1.52E-06 | 9.18E-01 | +++++?+-  | Better signals |
| rs12657353  | rs62355902 | 5q11.2 | 5 | 56196276 | A     | G     | 0.1503 | 1.15 (1.11-1.2)  | 4.00E-12 | 5.65E-13 | +++++?+++ | Better signals |
| rs96844     | rs62355902 | 5q11.2 | 5 | 56196604 | G     | A     | 0.2648 | 1.08 (1.04-1.11) | 1.21E-06 | 9.04E-01 | +++++?+-  | Better signals |
| rs5868034   | rs62355902 | 5q11.2 | 5 | 56198221 | GA    | G     | 0.442  | 0.94 (0.91-0.97) | 2.10E-05 | 8.42E-12 | +-----    | Better signals |
| rs173764    | rs62355902 | 5q11.2 | 5 | 56198920 | C     | T     | 0.446  | 0.94 (0.92-0.97) | 2.61E-05 | 1.86E-11 | +-----    | Better signals |
| rs832539    | rs62355902 | 5q11.2 | 5 | 56199386 | T     | G     | 0.5551 | 1.06 (1.03-1.09) | 2.59E-05 | 1.54E-11 | +-----    | Better signals |
| rs76679228  | rs62355902 | 5q11.2 | 5 | 56199511 | T     | C     | 0.1507 | 1.15 (1.11-1.2)  | 2.28E-12 | 2.19E-13 | +++++?+++ | Better signals |
| rs832538    | rs62355902 | 5q11.2 | 5 | 56200016 | C     | T     | 0.4419 | 0.94 (0.92-0.97) | 2.18E-05 | 1.14E-11 | +-----    | Better signals |
| rs702686    | rs62355902 | 5q11.2 | 5 | 56201350 | A     | G     | 0.5545 | 1.06 (1.03-1.09) | 2.39E-05 | 8.28E-12 | +-----    | Better signals |
| rs112793966 | rs62355902 | 5q11.2 | 5 | 56204118 | T     | C     | 0.1541 | 1.15 (1.11-1.2)  | 2.50E-12 | 2.97E-13 | +++++?+++ | Better signals |
| rs10042998  | rs62355902 | 5q11.2 | 5 | 56205299 | G     | A     | 0.8455 | 0.87 (0.84-0.9)  | 3.93E-12 | 6.55E-13 | -----?--  | Better signals |
| rs252924    | rs62355902 | 5q11.2 | 5 | 56205643 | A     | G     | 0.732  | 0.93 (0.9-0.96)  | 1.68E-06 | 9.23E-01 | -----+++  | Better signals |
| rs33320     | rs62355902 | 5q11.2 | 5 | 56206529 | C     | T     | 0.2618 | 1.08 (1.04-1.11) | 1.78E-06 | 9.29E-01 | +++++?+-  | Better signals |
| rs6450410   | rs62355902 | 5q11.2 | 5 | 56206701 | G     | A     | 0.8499 | 0.87 (0.84-0.91) | 5.55E-12 | 5.34E-14 | -----?--  | Better signals |
| rs7731829   | rs62355902 | 5q11.2 | 5 | 56207711 | C     | T     | 0.8457 | 0.87 (0.84-0.91) | 5.08E-12 | 5.37E-14 | -----?--  | Better signals |
| rs2271202   | rs62355902 | 5q11.2 | 5 | 56208541 | C     | T     | 0.8469 | 0.87 (0.84-0.91) | 5.46E-12 | 4.86E-14 | -----?--  | Better signals |
| rs33317     | rs62355902 | 5q11.2 | 5 | 56209275 | G     | A     | 0.267  | 1.07 (1.04-1.11) | 2.23E-06 | 8.51E-01 | +++++?+-  | Better signals |
| rs75167082  | rs62355902 | 5q11.2 | 5 | 56211404 | C     | T     | 0.8475 | 0.87 (0.84-0.9)  | 3.32E-12 | 3.63E-14 | -----?--  | Better signals |
| rs1965681   | rs62355902 | 5q11.2 | 5 | 56212186 | G     | A     | 0.8468 | 0.87 (0.84-0.91) | 5.73E-12 | 4.64E-14 | -----?--  | Better signals |
| rs3839259   | rs62355902 | 5q11.2 | 5 | 56212892 | C     | CATG  | 0.8499 | 0.87 (0.84-0.91) | 9.21E-12 | 8.87E-14 | -----?--  | Better signals |
| rs1466010   | rs62355902 | 5q11.2 | 5 | 56213156 | G     | A     | 0.8472 | 0.87 (0.84-0.91) | 7.38E-12 | 5.64E-14 | -----?--  | Better signals |
| rs1466007   | rs62355902 | 5q11.2 | 5 | 56213639 | C     | A     | 0.8473 | 0.87 (0.84-0.91) | 1.01E-11 | 7.16E-14 | -----?--  | Better signals |
| rs35420907  | rs62355902 | 5q11.2 | 5 | 56213941 | TATC  | T     | 0.85   | 0.88 (0.85-0.92) | 1.04E-08 | 5.56E-12 | -----???  | Better signals |
| rs150002094 | rs62355902 | 5q11.2 | 5 | 56214460 | ACTT  | A     | 0.8499 | 0.88 (0.85-0.92) | 1.09E-08 | 5.91E-12 | -----???  | Better signals |
| rs12654125  | rs62355902 | 5q11.2 | 5 | 56215753 | A     | G     | 0.1499 | 1.15 (1.1-1.19)  | 1.04E-11 | 1.03E-13 | +++++?+++ | Better signals |
| rs3756586   | rs62355902 | 5q11.2 | 5 | 56217196 | G     | A     | 0.8468 | 0.87 (0.84-0.91) | 7.58E-12 | 5.84E-14 | -----?--  | Better signals |
| rs16886496  | rs62355902 | 5q11.2 | 5 | 56217529 | C     | T     | 0.8472 | 0.87 (0.84-0.91) | 1.03E-11 | 4.18E-14 | -----?--  | Better signals |
| rs702681    | rs62355902 | 5q11.2 | 5 | 56218029 | C     | T     | 0.2675 | 1.07 (1.04-1.11) | 2.29E-06 | 8.60E-01 | +++++?+-  | Better signals |
| rs74865790  | rs62355902 | 5q11.2 | 5 | 56219698 | C     | T     | 0.8472 | 0.87 (0.84-0.91) | 1.04E-11 | 3.91E-14 | -----?--  | Better signals |
| rs35795629  | rs62355902 | 5q11.2 | 5 | 56220080 | GT    | G     | 0.846  | 0.88 (0.84-0.91) | 4.62E-11 | 2.77E-15 | ---+?--?  | Better signals |
| rs16886497  | rs62355902 | 5q11.2 | 5 | 56220714 | C     | T     | 0.8469 | 0.87 (0.84-0.91) | 1.08E-11 | 5.68E-14 | -----?--  | Better signals |
| rs12657064  | rs62355902 | 5q11.2 | 5 | 56220999 | A     | G     | 0.1531 | 1.15 (1.1-1.19)  | 1.23E-11 | 5.78E-14 | +++++?+?+ | Better signals |
| rs79354983  | rs62355902 | 5q11.2 | 5 | 56221537 | G     | A     | 0.8469 | 0.87 (0.84-0.91) | 1.17E-11 | 3.65E-14 | -----?--  | Better signals |
| rs6882657   | rs62355902 | 5q11.2 | 5 | 56222739 | T     | C     | 0.1532 | 1.15 (1.1-1.19)  | 1.06E-11 | 3.80E-14 | +++++?+?+ | Better signals |
| rs252897    | rs62355902 | 5q11.2 | 5 | 56223000 | G     | A     | 0.4426 | 0.94 (0.91-0.97) | 3.49E-05 | 1.51E-11 | +-----+   | Better signals |
| rs58477254  | rs62355902 | 5q11.2 | 5 | 56223878 | AT    | A     | 0.8468 | 0.87 (0.84-0.91) | 1.19E-11 | 4.99E-14 | -----?--  | Better signals |
| rs10684065  | rs62355902 | 5q11.2 | 5 | 56224485 | T     | TTGGC | 0.5386 | 1.07 (1.03-1.1)  | 6.74E-05 | 1.34E-11 | +++++?+?  | Better signals |
| rs252893    | rs62355902 | 5q11.2 | 5 | 56224714 | T     | C     | 0.5563 | 1.06 (1.03-1.09) | 3.19E-05 | 1.86E-11 | +-----+   | Better signals |
| rs61154548  | rs62355902 | 5q11.2 | 5 | 56224720 | T     | C     | 0.0736 | 1.21 (1.14-1.28) | 5.10E-11 | 9.08E-16 | +++++?+?+ | Better signals |
| rs113772507 | rs62355902 | 5q11.2 | 5 | 56225276 | T     | C     | 0.1532 | 1.15 (1.1-1.19)  | 1.24E-11 | 4.04E-14 | +++++?+?+ | Better signals |
| rs173763    | rs62355902 | 5q11.2 | 5 | 56225418 | G     | A     | 0.4594 | 0.94 (0.91-0.96) | 1.42E-05 | 1.11E-11 | +-----?   | Better signals |
| rs189695    | rs62355902 | 5q11.2 | 5 | 56225769 | T     | C     | 0.5402 | 1.07 (1.04-1.1)  | 1.65E-05 | 1.35E-11 | +++++?+?  | Better signals |
| rs252889    | rs62355902 | 5q11.2 | 5 | 56227069 | C     | A     | 0.4594 | 0.94 (0.91-0.96) | 1.40E-05 | 1.21E-11 | +-----?   | Better signals |
| rs142586759 | rs62355902 | 5q11.2 | 5 | 56227379 | GATAA | G     | 0.8498 | 0.88 (0.85-0.92) | 1.37E-08 | 1.20E-12 | -----???  | Better signals |
| rs138611541 | rs62355902 | 5q11.2 | 5 | 56228040 | C     | T     | 0.9257 | 0.83 (0.78-0.88) | 1.02E-10 | 1.10E-14 | -----?--  | Better signals |
| rs832531    | rs62355902 | 5q11.2 | 5 | 56228401 | A     | G     | 0.5407 | 1.07 (1.04-1.1)  | 1.31E-05 | 1.26E-11 | +-----+   | Better signals |
| rs16886510  | rs62355902 | 5q11.2 | 5 | 56228445 | A     | G     | 0.1543 | 1.14 (1.1-1.19)  | 2.05E-11 | 4.50E-14 | +++++?+++ | Better signals |
| rs78075120  | rs62355902 | 5q11.2 | 5 | 56228467 | A     | G     | 0.1554 | 1.14 (1.1-1.19)  | 2.27E-11 | 4.49E-14 | +++++?+++ | Better signals |
| rs76869724  | rs62355902 | 5q11.2 | 5 | 56228495 | C     | T     | 0.8447 | 0.88 (0.84-0.91) | 2.30E-11 | 4.24E-14 | -----?--  | Better signals |

|             |                     |        |   |           |         |              |        |                  |          |          |           |                   |
|-------------|---------------------|--------|---|-----------|---------|--------------|--------|------------------|----------|----------|-----------|-------------------|
| rs16886518  | rs62355902          | 5q11.2 | 5 | 56233737  | A       | C            | 0.3257 | 0.92 (0.89-0.95) | 5.16E-07 | 3.22E-04 | ---+---   | Better signals    |
| rs12514633  | rs62355902          | 5q11.2 | 5 | 56236013  | T       | C            | 0.1669 | 1.13 (1.09-1.18) | 6.26E-11 | 6.29E-14 | +++++?+++ | Better signals    |
| rs16886525  | rs62355902          | 5q11.2 | 5 | 56237665  | A       | C            | 0.1703 | 1.13 (1.09-1.17) | 7.37E-11 | 6.84E-14 | +++++?+++ | Better signals    |
| rs201971331 | rs62355902          | 5q11.2 | 5 | 56237882  | C       | CAGTTAAGTTTA | 0.9297 | 0.85 (0.8-0.91)  | 8.45E-07 | 6.21E-12 | -----???  | Better signals    |
| rs75713680  | rs62355902          | 5q11.2 | 5 | 56238204  | A       | G            | 0.1703 | 1.13 (1.09-1.17) | 6.76E-11 | 6.55E-14 | +++++?+++ | Better signals    |
| rs56154402  | rs62355902          | 5q11.2 | 5 | 56241284  | T       | C            | 0.3325 | 0.92 (0.89-0.95) | 4.20E-07 | 3.29E-04 | ---+---   | Better signals    |
| rs76797434  | rs62355902          | 5q11.2 | 5 | 56241689  | G       | A            | 0.8294 | 0.88 (0.85-0.92) | 8.96E-11 | 9.42E-14 | -----?--- | Better signals    |
| rs58568222  | rs62355902          | 5q11.2 | 5 | 56243303  | T       | C            | 0.3254 | 0.92 (0.89-0.95) | 4.06E-07 | 1.32E-04 | ---+---   | Better signals    |
| rs62356565  | rs62355902          | 5q11.2 | 5 | 56243966  | G       | A            | 0.6747 | 1.09 (1.05-1.12) | 5.01E-07 | 3.17E-04 | +++++?+++ | Better signals    |
| rs111932730 | rs62355902          | 5q11.2 | 5 | 56244291  | A       | G            | 0.1706 | 1.13 (1.09-1.17) | 1.26E-10 | 1.26E-13 | +++++?+++ | Better signals    |
| rs55698001  | rs62355902          | 5q11.2 | 5 | 56245140  | G       | A            | 0.668  | 1.09 (1.05-1.13) | 4.98E-07 | 4.12E-04 | +++++?+++ | Better signals    |
| rs74455703  | rs62355902          | 5q11.2 | 5 | 56245269  | G       | C            | 0.8292 | 0.88 (0.85-0.92) | 1.41E-10 | 1.44E-13 | -----?--- | Better signals    |
| rs34804097  | rs62355902          | 5q11.2 | 5 | 56246276  | AAAC    | A            | 0.5095 | 1.07 (1.03-1.1)  | 7.95E-05 | 3.55E-04 | +++++?+-  | Better signals    |
| rs62356567  | rs62355902          | 5q11.2 | 5 | 56249269  | G       | A            | 0.6675 | 1.09 (1.05-1.13) | 7.13E-07 | 2.50E-04 | +++++?+++ | Better signals    |
| rs79565352  | rs62355902          | 5q11.2 | 5 | 56251753  | A       | G            | 0.1214 | 1.14 (1.08-1.2)  | 3.67E-07 | 2.53E-14 | +++++?+++ | Better signals    |
| rs74571895  | rs62355902          | 5q11.2 | 5 | 56254772  | G       | A            | 0.8777 | 0.88 (0.83-0.92) | 3.92E-07 | 1.16E-14 | -----?--- | Better signals    |
| rs78743305  | rs62355902          | 5q11.2 | 5 | 56256217  | A       | G            | 0.122  | 1.14 (1.08-1.2)  | 5.65E-07 | 2.36E-14 | +++++?+++ | Better signals    |
| rs7726354   | rs62355902          | 5q11.2 | 5 | 56256483  | T       | C            | 0.1224 | 1.14 (1.08-1.2)  | 5.71E-07 | 3.48E-14 | +++++?+++ | Better signals    |
| rs16886556  | rs62355902          | 5q11.2 | 5 | 56260339  | G       | T            | 0.6714 | 1.07 (1.03-1.1)  | 8.33E-05 | 2.94E-04 | +++++?+++ | Better signals    |
| rs62356590  | rs62355902          | 5q11.2 | 5 | 56261029  | G       | A            | 0.6921 | 1.07 (1.04-1.11) | 3.36E-05 | 4.80E-04 | +++++?+++ | Better signals    |
| rs79760198  | rs62355902          | 5q11.2 | 5 | 56262639  | C       | T            | 0.936  | 0.86 (0.81-0.91) | 3.69E-07 | 1.06E-12 | -----?+-  | Better signals    |
| rs79041328  | rs62355902          | 5q11.2 | 5 | 56264375  | G       | A            | 0.9361 | 0.86 (0.81-0.91) | 4.46E-07 | 1.22E-12 | -----?+-  | Better signals    |
| rs6893174   | rs62355902          | 5q11.2 | 5 | 56265025  | T       | C            | 0.0642 | 1.16 (1.1-1.24)  | 5.71E-07 | 7.67E-13 | +++++?+++ | Better signals    |
| rs113325879 | rs62355902          | 5q11.2 | 5 | 56266142  | A       | G            | 0.0639 | 1.17 (1.1-1.24)  | 5.32E-07 | 1.41E-12 | +++++?+++ | Better signals    |
| rs142258027 | rs62355902          | 5q11.2 | 5 | 56266278  | A       | G            | 0.0639 | 1.17 (1.1-1.24)  | 5.33E-07 | 1.41E-12 | +++++?+++ | Better signals    |
| rs113173541 | rs62355902          | 5q11.2 | 5 | 56266689  | A       | C            | 0.0639 | 1.17 (1.1-1.24)  | 5.33E-07 | 1.65E-12 | +++++?+++ | Better signals    |
| rs78925509  | rs62355902          | 5q11.2 | 5 | 56267141  | G       | A            | 0.9361 | 0.86 (0.81-0.91) | 5.20E-07 | 1.47E-12 | -----?+-  | Better signals    |
| rs113567198 | rs62355902          | 5q11.2 | 5 | 56267155  | A       | AT           | 0.0642 | 1.17 (1.1-1.24)  | 3.47E-07 | 1.13E-13 | +++++?+++ | Better signals    |
| rs73122135  | rs62355902          | 5q11.2 | 5 | 56267308  | A       | G            | 0.0643 | 1.17 (1.1-1.24)  | 4.42E-07 | 2.52E-13 | +++++?+++ | Better signals    |
| rs80089016  | rs62355902          | 5q11.2 | 5 | 56267444  | A       | G            | 0.0639 | 1.16 (1.1-1.24)  | 5.75E-07 | 1.40E-12 | +++++?+++ | Better signals    |
| rs73122138  | rs62355902          | 5q11.2 | 5 | 56267949  | A       | G            | 0.064  | 1.17 (1.1-1.24)  | 4.21E-07 | 2.57E-13 | +++++?+++ | Better signals    |
| rs80310238  | rs62355902          | 5q11.2 | 5 | 56267984  | A       | C            | 0.0639 | 1.17 (1.1-1.24)  | 5.12E-07 | 1.63E-12 | +++++?+++ | Better signals    |
| rs77706078  | rs62355902          | 5q11.2 | 5 | 56268686  | A       | G            | 0.0639 | 1.17 (1.1-1.24)  | 4.93E-07 | 1.16E-12 | +++++?+++ | Better signals    |
| rs144063116 | rs62355902          | 5q11.2 | 5 | 56268884  | IGGGAGC | C            | 0.0641 | 1.14 (1.07-1.22) | 4.14E-05 | 1.51E-11 | +++++?+++ | Better signals    |
| rs2408651   | rs62355902          | 5q11.2 | 5 | 56268991  | C       | T            | 0.9222 | 0.85 (0.8-0.9)   | 2.44E-09 | 1.03E-14 | -----?+-  | Better signals    |
| rs79459889  | rs62355902          | 5q11.2 | 5 | 56269286  | A       | G            | 0.0775 | 1.18 (1.11-1.24) | 3.67E-09 | 8.56E-14 | +++++?+++ | Better signals    |
| rs111773762 | rs62355902          | 5q11.2 | 5 | 56269336  | C       | T            | 0.9225 | 0.85 (0.81-0.9)  | 3.47E-09 | 7.87E-14 | -----?+-  | Better signals    |
| rs80097053  | rs62355902          | 5q11.2 | 5 | 56269492  | T       | C            | 0.0775 | 1.18 (1.12-1.24) | 2.88E-09 | 6.77E-14 | +++++?+++ | Better signals    |
| rs59536253  | rs62355902          | 5q11.2 | 5 | 56269512  | G       | A            | 0.9222 | 0.85 (0.8-0.89)  | 1.94E-09 | 1.04E-14 | -----?+-  | Better signals    |
| rs112032073 | rs62355902          | 5q11.2 | 5 | 56270717  | T       | G            | 0.0775 | 1.18 (1.12-1.24) | 2.99E-09 | 4.82E-14 | +++++?+++ | Better signals    |
| rs62356591  | rs62355902          | 5q11.2 | 5 | 56271724  | T       | C            | 0.3075 | 0.93 (0.9-0.96)  | 4.00E-05 | 2.65E-04 | -----?+-  | Better signals    |
| rs72759746  | rs62355902          | 5q11.2 | 5 | 56275927  | T       | C            | 0.3005 | 0.93 (0.9-0.97)  | 6.20E-05 | 3.86E-04 | -----?--- | Better signals    |
| rs66585063  | rs9397437,rs2747652 | 6q25.1 | 6 | 151952645 | T       | G            | 0.03   | 1.2 (1.11-1.3)   | 9.93E-06 | 4.99E-17 | +++++?+++ | Secondary signals |
| rs9784821   | rs9397437,rs2747652 | 6q25.1 | 6 | 151953309 | C       | T            | 0.9701 | 0.83 (0.77-0.9)  | 9.79E-06 | 6.34E-17 | -----     | Secondary signals |
| rs11753383  | rs9397437,rs2747652 | 6q25.1 | 6 | 151954659 | A       | G            | 0.0304 | 1.2 (1.1-1.3)    | 1.45E-05 | 5.03E-17 | +++++?+++ | Secondary signals |
| rs11759768  | rs9397437,rs2747652 | 6q25.1 | 6 | 151955481 | G       | C            | 0.9706 | 0.82 (0.76-0.9)  | 4.86E-06 | 1.40E-15 | +-----    | Secondary signals |
| rs73001924  | rs9397437,rs2747652 | 6q25.1 | 6 | 151955995 | T       | A            | 0.9701 | 0.83 (0.77-0.9)  | 7.65E-06 | 1.34E-15 | -----     | Secondary signals |
| rs12203668  | rs9397437,rs2747652 | 6q25.1 | 6 | 151956625 | G       | A            | 0.97   | 0.83 (0.76-0.9)  | 6.36E-06 | 1.57E-15 | -----     | Secondary signals |
| rs11155806  | rs9397437,rs2747652 | 6q25.1 | 6 | 151956890 | A       | C            | 0.0297 | 1.21 (1.11-1.31) | 6.89E-06 | 1.62E-15 | +++++?+++ | Secondary signals |
| rs66688403  | rs9397437,rs2747652 | 6q25.1 | 6 | 151958153 | C       | A            | 0.9709 | 0.83 (0.77-0.91) | 1.60E-05 | 3.92E-13 | +-----    | Secondary signals |
| rs10872677  | rs9397437,rs2747652 | 6q25.1 | 6 | 151959249 | T       | C            | 0.0297 | 1.21 (1.11-1.31) | 7.12E-06 | 1.64E-15 | +++++?+++ | Secondary signals |

|             |                     |        |   |           |    |            |        |                  |          |          |          |                   |
|-------------|---------------------|--------|---|-----------|----|------------|--------|------------------|----------|----------|----------|-------------------|
| rs12197785  | rs9397437,rs2747652 | 6q25.1 | 6 | 151960605 | G  | C          | 0.9702 | 0.83 (0.76-0.9)  | 6.49E-06 | 1.44E-15 | -----    | Secondary signals |
| rs67413479  | rs9397437,rs2747652 | 6q25.1 | 6 | 151960929 | A  | G          | 0.0304 | 1.21 (1.11-1.31) | 5.13E-06 | 1.19E-15 | +++++++  | Secondary signals |
| rs3020313   | rs9397437,rs2747652 | 6q25.1 | 6 | 151961900 | A  | G          | 0.0299 | 1.21 (1.11-1.31) | 6.42E-06 | 1.15E-15 | +++++++  | Secondary signals |
| rs115713943 | rs9397437,rs2747652 | 6q25.1 | 6 | 151967935 | G  | A          | 0.9693 | 0.83 (0.77-0.9)  | 1.33E-05 | 3.99E-14 | -----    | Secondary signals |
| rs3020302   | rs9397437,rs2747652 | 6q25.1 | 6 | 151969326 | G  | A          | 0.9695 | 0.83 (0.77-0.91) | 1.40E-05 | 1.64E-14 | -----    | Secondary signals |
| rs11155807  | rs9397437,rs2747652 | 6q25.1 | 6 | 151969362 | A  | T          | 0.0305 | 1.2 (1.11-1.3)   | 1.36E-05 | 1.47E-14 | +++++++  | Secondary signals |
| rs3020331   | rs9397437,rs2747652 | 6q25.1 | 6 | 152008780 | T  | C          | 0.1357 | 1.13 (1.08-1.17) | 9.10E-10 | 5.14E-21 | +++++++  | Secondary signals |
| rs3020332   | rs9397437,rs2747652 | 6q25.1 | 6 | 152008924 | T  | C          | 0.1636 | 1.08 (1.04-1.12) | 1.30E-05 | 2.82E-15 | +++++++  | Secondary signals |
| rs2941741   | rs9397437,rs2747652 | 6q25.1 | 6 | 152008982 | A  | G          | 0.1347 | 1.13 (1.08-1.17) | 8.19E-10 | 5.22E-24 | +++++++  | Secondary signals |
| rs2941740   | rs9397437,rs2747652 | 6q25.1 | 6 | 152009638 | G  | A          | 0.8645 | 0.89 (0.86-0.92) | 1.90E-09 | 1.39E-23 | -----    | Secondary signals |
| rs3020333   | rs9397437,rs2747652 | 6q25.1 | 6 | 152010254 | G  | A          | 0.8167 | 0.93 (0.9-0.96)  | 2.27E-05 | 2.36E-15 | ----     | Secondary signals |
| rs142786557 | rs9397437,rs2747652 | 6q25.1 | 6 | 152010370 | A  | AT         | 0.1362 | 1.13 (1.08-1.17) | 4.06E-09 | 1.21E-22 | +++++++? | Secondary signals |
| rs2982573   | rs9397437,rs2747652 | 6q25.1 | 6 | 152010534 | C  | T          | 0.8648 | 0.89 (0.86-0.92) | 1.24E-09 | 1.12E-23 | -----    | Secondary signals |
| rs2982572   | rs9397437,rs2747652 | 6q25.1 | 6 | 152010561 | T  | C          | 0.1352 | 1.13 (1.08-1.17) | 1.00E-09 | 7.35E-24 | +++++++  | Secondary signals |
| rs2982571   | rs9397437,rs2747652 | 6q25.1 | 6 | 152012739 | T  | A          | 0.8633 | 0.89 (0.86-0.93) | 2.56E-09 | 2.91E-24 | -----    | Secondary signals |
| rs3020334   | rs9397437,rs2747652 | 6q25.1 | 6 | 152012956 | G  | A          | 0.8642 | 0.89 (0.86-0.93) | 3.39E-09 | 3.99E-24 | -----    | Secondary signals |
| rs2941742   | rs9397437,rs2747652 | 6q25.1 | 6 | 152012988 | G  | A          | 0.8632 | 0.89 (0.86-0.93) | 2.50E-09 | 3.35E-24 | -----    | Secondary signals |
| rs3020335   | rs9397437,rs2747652 | 6q25.1 | 6 | 152013223 | T  | G          | 0.1365 | 1.12 (1.08-1.17) | 1.95E-09 | 9.16E-25 | +++++++  | Secondary signals |
| rs2982570   | rs9397437,rs2747652 | 6q25.1 | 6 | 152013748 | T  | C          | 0.1395 | 1.12 (1.08-1.17) | 1.32E-09 | 9.24E-25 | +++++++  | Secondary signals |
| rs3020336   | rs9397437,rs2747652 | 6q25.1 | 6 | 152013760 | T  | G          | 0.1368 | 1.12 (1.08-1.17) | 2.44E-09 | 1.09E-24 | +++++++  | Secondary signals |
| rs2941739   | rs9397437,rs2747652 | 6q25.1 | 6 | 152014804 | C  | G          | 0.1645 | 1.08 (1.04-1.12) | 2.41E-05 | 1.55E-18 | +++++++  | Secondary signals |
| rs141433618 | rs9397437,rs2747652 | 6q25.1 | 6 | 152016083 | A  | AAGTGTGCC  | 0.0268 | 0.83 (0.76-0.91) | 8.76E-05 | 3.79E-09 | -----??  | Secondary signals |
| rs862346    | rs9397437,rs2747652 | 6q25.1 | 6 | 152016369 | T  | A          | 0.8409 | 0.93 (0.89-0.96) | 2.56E-05 | 1.61E-21 | -----    | Secondary signals |
| rs851996    | rs9397437,rs2747652 | 6q25.1 | 6 | 152016803 | T  | C          | 0.159  | 1.08 (1.04-1.12) | 2.47E-05 | 6.05E-22 | +++++++  | Secondary signals |
| rs1293936   | rs9397437,rs2747652 | 6q25.1 | 6 | 152017691 | G  | T          | 0.8404 | 0.93 (0.89-0.96) | 2.80E-05 | 6.90E-21 | -----    | Secondary signals |
| rs1293935   | rs9397437,rs2747652 | 6q25.1 | 6 | 152017958 | G  | C          | 0.8219 | 0.93 (0.9-0.96)  | 3.48E-05 | 4.06E-21 | -----    | Secondary signals |
| rs200496833 | rs9397437,rs2747652 | 6q25.1 | 6 | 152018902 | A  | ATTCTATAGC | 0.0269 | 0.83 (0.76-0.91) | 7.70E-05 | 3.37E-09 | -----??  | Secondary signals |
| rs851985    | rs9397437,rs2747652 | 6q25.1 | 6 | 152020390 | A  | C          | 0.8675 | 0.89 (0.86-0.93) | 4.99E-09 | 4.99E-09 | -----?   | Secondary signals |
| rs34905961  | rs9397437,rs2747652 | 6q25.1 | 6 | 152021803 | C  | CTTT       | 0.8733 | 0.9 (0.87-0.94)  | 1.26E-06 | 3.32E-29 | -----?   | Secondary signals |
| rs113950968 | rs9397437,rs2747652 | 6q25.1 | 6 | 152022346 | GT | G          | 0.8183 | 0.92 (0.89-0.96) | 3.68E-05 | 2.85E-22 | -----?   | Secondary signals |
| rs851984    | rs9397437,rs2747652 | 6q25.1 | 6 | 152023191 | A  | G          | 0.1299 | 1.12 (1.08-1.17) | 5.82E-09 | 6.82E-32 | +++++++  | Secondary signals |
| rs851983    | rs9397437,rs2747652 | 6q25.1 | 6 | 152024415 | G  | A          | 0.8702 | 0.89 (0.86-0.93) | 8.23E-09 | 1.39E-31 | -----    | Secondary signals |
| rs851982    | rs9397437,rs2747652 | 6q25.1 | 6 | 152024985 | C  | T          | 0.8691 | 0.9 (0.86-0.93)  | 1.74E-08 | 3.43E-31 | -----    | Secondary signals |
| rs74366500  | rs9397437,rs2747652 | 6q25.1 | 6 | 152026689 | A  | G          | 0.9513 | 0.85 (0.8-0.9)   | 3.23E-07 | 3.23E-07 | -----?   | Secondary signals |
| rs851981    | rs9397437,rs2747652 | 6q25.1 | 6 | 152027074 | T  | A          | 0.8715 | 0.89 (0.86-0.93) | 1.27E-08 | 4.37E-22 | -----    | Secondary signals |
| rs851980    | rs9397437,rs2747652 | 6q25.1 | 6 | 152027955 | C  | T          | 0.8708 | 0.9 (0.86-0.93)  | 2.26E-08 | 4.54E-22 | -----    | Secondary signals |
| rs851975    | rs9397437,rs2747652 | 6q25.1 | 6 | 152031303 | T  | C          | 0.1289 | 1.12 (1.07-1.16) | 1.85E-08 | 2.74E-21 | +++++++  | Secondary signals |
| rs139680793 | rs9397437,rs2747652 | 6q25.1 | 6 | 152034062 | A  | G          | 0.1289 | 1.12 (1.08-1.16) | 1.66E-08 | 2.99E-21 | +++++++  | Secondary signals |
| rs141222583 | rs9397437,rs2747652 | 6q25.1 | 6 | 152034624 | A  | G          | 0.1292 | 1.12 (1.07-1.16) | 1.86E-08 | 4.00E-21 | +++++++  | Secondary signals |
| rs150182883 | rs9397437,rs2747652 | 6q25.1 | 6 | 152034758 | T  | C          | 0.1265 | 1.12 (1.08-1.16) | 1.90E-08 | 3.95E-21 | +++++++  | Secondary signals |
| rs115931026 | rs9397437,rs2747652 | 6q25.1 | 6 | 152034820 | C  | T          | 0.8732 | 0.89 (0.86-0.93) | 1.94E-08 | 3.44E-21 | -----    | Secondary signals |
| rs2206948   | rs9397437,rs2747652 | 6q25.1 | 6 | 152037557 | A  | T          | 0.128  | 1.12 (1.08-1.16) | 1.42E-08 | 2.92E-21 | +++++++  | Secondary signals |
| rs6932703   | rs9397437,rs2747652 | 6q25.1 | 6 | 152038240 | A  | G          | 0.1295 | 1.12 (1.07-1.16) | 2.47E-08 | 2.15E-21 | +++++++  | Secondary signals |
| rs12526447  | rs9397437,rs2747652 | 6q25.1 | 6 | 152040125 | G  | A          | 0.8699 | 0.9 (0.86-0.93)  | 2.98E-08 | 6.54E-21 | -----    | Secondary signals |
| rs3020339   | rs9397437,rs2747652 | 6q25.1 | 6 | 152040615 | A  | G          | 0.1303 | 1.11 (1.07-1.16) | 3.41E-08 | 2.94E-21 | +++++++  | Secondary signals |
| rs75212262  | rs9397437,rs2747652 | 6q25.1 | 6 | 152040877 | G  | T          | 0.943  | 0.86 (0.81-0.91) | 4.82E-07 | 2.07E-08 | -----    | Secondary signals |
| rs10484921  | rs9397437,rs2747652 | 6q25.1 | 6 | 152042260 | A  | C          | 0.1297 | 1.12 (1.07-1.16) | 1.71E-08 | 4.22E-21 | +++++++  | Secondary signals |
| rs11755191  | rs9397437,rs2747652 | 6q25.1 | 6 | 152044107 | C  | T          | 0.9432 | 0.86 (0.81-0.91) | 5.36E-07 | 4.99E-09 | -----    | Secondary signals |
| rs7749659   | rs9397437,rs2747652 | 6q25.1 | 6 | 152044884 | G  | A          | 0.8695 | 0.9 (0.86-0.93)  | 4.33E-08 | 3.00E-21 | -----    | Secondary signals |
| rs6940919   | rs9397437,rs2747652 | 6q25.1 | 6 | 152047476 | G  | T          | 0.8544 | 0.92 (0.89-0.95) | 7.28E-06 | 1.81E-19 | -----    | Secondary signals |
| rs2982561   | rs9397437,rs2747652 | 6q25.1 | 6 | 152052652 | C  | T          | 0.1828 | 1.09 (1.06-1.13) | 1.74E-07 | 6.03E-16 | +++++++  | Secondary signals |

|             |                     |        |   |           |      |      |        |                  |          |          |          |                   |
|-------------|---------------------|--------|---|-----------|------|------|--------|------------------|----------|----------|----------|-------------------|
| rs6904031   | rs9397437,rs2747652 | 6q25.1 | 6 | 152055978 | T    | A    | 0.9156 | 0.89 (0.85-0.93) | 1.23E-06 | 1.27E-25 | -----    | Secondary signals |
| rs2982558   | rs9397437,rs2747652 | 6q25.1 | 6 | 152056146 | A    | G    | 0.8169 | 0.91 (0.88-0.94) | 8.62E-08 | 3.36E-16 | -----    | Secondary signals |
| rs2982556   | rs9397437,rs2747652 | 6q25.1 | 6 | 152056842 | G    | A    | 0.1829 | 1.1 (1.06-1.13)  | 1.12E-07 | 3.93E-16 | +++++++  | Secondary signals |
| rs3020300   | rs9397437,rs2747652 | 6q25.1 | 6 | 152058844 | T    | A    | 0.1781 | 1.1 (1.06-1.13)  | 2.03E-07 | 4.50E-16 | +++++++  | Secondary signals |
| rs2982552   | rs9397437,rs2747652 | 6q25.1 | 6 | 152059563 | G    | A    | 0.1794 | 1.09 (1.06-1.13) | 2.92E-07 | 1.36E-15 | +++++++  | Secondary signals |
| rs2982551   | rs9397437,rs2747652 | 6q25.1 | 6 | 152061210 | G    | T    | 0.2019 | 1.09 (1.06-1.13) | 1.72E-07 | 9.94E-16 | +++++++  | Secondary signals |
| rs2982550   | rs9397437,rs2747652 | 6q25.1 | 6 | 152061474 | G    | T    | 0.202  | 1.09 (1.06-1.13) | 1.73E-07 | 1.42E-15 | +++++++  | Secondary signals |
| rs3020301   | rs9397437,rs2747652 | 6q25.1 | 6 | 152061579 | T    | C    | 0.7983 | 0.91 (0.88-0.95) | 1.69E-07 | 1.40E-15 | -----    | Secondary signals |
| rs1361024   | rs9397437,rs2747652 | 6q25.1 | 6 | 152070928 | A    | G    | 0.085  | 1.12 (1.07-1.17) | 4.47E-06 | 2.98E-17 | +++++++  | Secondary signals |
| rs9918437   | rs9397437,rs2747652 | 6q25.1 | 6 | 152072718 | T    | G    | 0.084  | 1.12 (1.06-1.17) | 7.19E-06 | 1.12E-17 | +++++++  | Secondary signals |
| rs6935443   | rs9397437,rs2747652 | 6q25.1 | 6 | 152114448 | G    | A    | 0.5594 | 1.07 (1.04-1.1)  | 7.99E-07 | 3.23E-03 | +++++++  | Secondary signals |
| rs78880143  | rs9397437,rs2747652 | 6q25.1 | 6 | 152117128 | C    | CA   | 0.4992 | 0.95 (0.92-0.97) | 9.68E-05 | 1.53E-03 | -----+?  | Secondary signals |
| rs2881766   | rs9397437,rs2747652 | 6q25.1 | 6 | 152119119 | G    | T    | 0.5582 | 1.07 (1.04-1.1)  | 5.10E-07 | 4.99E-03 | +++++++  | Secondary signals |
| rs9478244   | rs9397437,rs2747652 | 6q25.1 | 6 | 152122037 | G    | A    | 0.5629 | 1.07 (1.04-1.1)  | 7.73E-07 | 5.13E-03 | +++++++  | Secondary signals |
| rs6914438   | rs9397437,rs2747652 | 6q25.1 | 6 | 152129588 | T    | C    | 0.2847 | 0.93 (0.9-0.96)  | 1.15E-06 | 4.59E-08 | -----    | Secondary signals |
| rs3778609   | rs9397437,rs2747652 | 6q25.1 | 6 | 152133187 | T    | C    | 0.2839 | 0.93 (0.91-0.96) | 1.16E-06 | 4.84E-08 | -----    | Secondary signals |
| rs3778610   | rs9397437,rs2747652 | 6q25.1 | 6 | 152133351 | G    | A    | 0.7156 | 1.07 (1.04-1.11) | 1.03E-06 | 1.13E-07 | +++++++  | Secondary signals |
| rs7771894   | rs9397437,rs2747652 | 6q25.1 | 6 | 152145916 | T    | C    | 0.2821 | 0.93 (0.9-0.96)  | 1.04E-06 | 3.81E-08 | -----    | Secondary signals |
| rs9340844   | rs9397437,rs2747652 | 6q25.1 | 6 | 152201624 | A    | G    | 0.1015 | 0.89 (0.85-0.93) | 2.09E-07 | 2.09E-07 | -----?   | Secondary signals |
| rs12176058  | rs9397437,rs2747652 | 6q25.1 | 6 | 152209151 | T    | C    | 0.1017 | 0.89 (0.85-0.93) | 1.33E-07 | 1.33E-07 | -----?   | Secondary signals |
| rs12176079  | rs9397437,rs2747652 | 6q25.1 | 6 | 152209314 | A    | G    | 0.1017 | 0.89 (0.85-0.93) | 1.33E-07 | 1.33E-07 | -----?   | Secondary signals |
| rs9397452   | rs9397437,rs2747652 | 6q25.1 | 6 | 152215626 | T    | C    | 0.1012 | 0.89 (0.85-0.93) | 8.47E-08 | 8.47E-08 | -----?   | Secondary signals |
| rs9371561   | rs9397437,rs2747652 | 6q25.1 | 6 | 152218393 | A    | G    | 0.1012 | 0.89 (0.85-0.93) | 8.13E-08 | 8.13E-08 | -----?   | Secondary signals |
| rs371510396 | rs9397437,rs2747652 | 6q25.1 | 6 | 152219519 | A    | AT   | 0.1348 | 0.91 (0.87-0.95) | 2.68E-05 | 4.35E-06 | -+-----? | Secondary signals |
| rs186812658 | rs9397437,rs2747652 | 6q25.1 | 6 | 152220900 | A    | C    | 0.1022 | 0.89 (0.85-0.93) | 6.65E-08 | 6.65E-08 | -----?   | Secondary signals |
| rs12174347  | rs9397437,rs2747652 | 6q25.1 | 6 | 152221531 | A    | C    | 0.1021 | 0.89 (0.85-0.93) | 6.61E-08 | 6.61E-08 | -----?   | Secondary signals |
| rs9383594   | rs9397437,rs2747652 | 6q25.1 | 6 | 152221861 | C    | G    | 0.8979 | 1.13 (1.08-1.18) | 6.66E-08 | 6.66E-08 | +++++++? | Secondary signals |
| rs74847648  | rs9397437,rs2747652 | 6q25.1 | 6 | 152222490 | A    | G    | 0.1021 | 0.89 (0.85-0.93) | 6.59E-08 | 6.59E-08 | -----?   | Secondary signals |
| rs9340866   | rs9397437,rs2747652 | 6q25.1 | 6 | 152224651 | A    | T    | 0.1787 | 0.93 (0.9-0.96)  | 1.49E-05 | 3.75E-05 | -----    | Secondary signals |
| rs35232263  | rs9397437,rs2747652 | 6q25.1 | 6 | 152234697 | G    | A    | 0.821  | 1.08 (1.04-1.12) | 1.21E-05 | 4.42E-05 | +++++++  | Secondary signals |
| rs9322343   | rs9397437,rs2747652 | 6q25.1 | 6 | 152237759 | G    | A    | 0.8164 | 1.08 (1.04-1.11) | 1.15E-05 | 3.44E-05 | +++++++  | Secondary signals |
| rs9322344   | rs9397437,rs2747652 | 6q25.1 | 6 | 152237780 | C    | T    | 0.8165 | 1.08 (1.04-1.11) | 1.24E-05 | 4.36E-05 | +++++++  | Secondary signals |
| rs9397072   | rs9397437,rs2747652 | 6q25.1 | 6 | 152239321 | T    | C    | 0.1836 | 0.93 (0.9-0.96)  | 8.37E-06 | 3.17E-05 | -----    | Secondary signals |
| rs5880952   | rs9397437,rs2747652 | 6q25.1 | 6 | 152319503 | C    | CT   | 0.6747 | 0.94 (0.92-0.97) | 8.19E-05 | 1.36E-07 | -----?   | Secondary signals |
| rs722209    | rs9397437,rs2747652 | 6q25.1 | 6 | 152323196 | T    | C    | 0.3278 | 1.06 (1.03-1.09) | 9.79E-05 | 1.88E-07 | +++++++  | Secondary signals |
| rs2207231   | rs9397437,rs2747652 | 6q25.1 | 6 | 152329884 | G    | A    | 0.6767 | 0.95 (0.92-0.97) | 6.58E-05 | 1.31E-07 | -----    | Secondary signals |
| rs71979928  | rs9397437,rs2747652 | 6q25.1 | 6 | 152332042 | C    | CTCT | 0.679  | 0.94 (0.91-0.97) | 4.13E-05 | 2.98E-08 | -----?   | Secondary signals |
| rs13203975  | rs9397437,rs2747652 | 6q25.1 | 6 | 152333104 | A    | G    | 0.3233 | 1.06 (1.03-1.09) | 6.72E-05 | 1.36E-07 | +++++++  | Secondary signals |
| rs12663193  | rs9397437,rs2747652 | 6q25.1 | 6 | 152335236 | A    | G    | 0.3227 | 1.06 (1.03-1.09) | 7.55E-05 | 5.42E-08 | +++++++  | Secondary signals |
| rs34862067  | rs9397437,rs2747652 | 6q25.1 | 6 | 152339974 | AAAG | A    | 0.6812 | 0.94 (0.91-0.97) | 6.42E-05 | 2.53E-07 | -----?-  | Secondary signals |
| rs2207232   | rs9397437,rs2747652 | 6q25.1 | 6 | 152340288 | C    | T    | 0.6398 | 0.95 (0.92-0.97) | 7.26E-05 | 2.16E-07 | -----+   | Secondary signals |
| rs67690147  | rs9397437,rs2747652 | 6q25.1 | 6 | 152340494 | A    | G    | 0.3596 | 1.06 (1.03-1.09) | 7.31E-05 | 1.87E-07 | +++++++  | Secondary signals |
| rs17082033  | rs9397437,rs2747652 | 6q25.1 | 6 | 152340648 | T    | A    | 0.6403 | 0.95 (0.92-0.97) | 7.81E-05 | 5.41E-08 | -----+   | Secondary signals |
| rs9340985   | rs9397437,rs2747652 | 6q25.1 | 6 | 152341587 | C    | T    | 0.6462 | 0.94 (0.92-0.97) | 2.05E-05 | 1.57E-08 | -----+   | Secondary signals |
| rs9340995   | rs9397437,rs2747652 | 6q25.1 | 6 | 152342779 | C    | G    | 0.3587 | 1.06 (1.03-1.08) | 9.69E-05 | 4.84E-08 | +++++++  | Secondary signals |
| rs3020418   | rs9397437,rs2747652 | 6q25.1 | 6 | 152345162 | A    | G    | 0.4452 | 1.06 (1.03-1.09) | 1.20E-05 | 5.59E-09 | +++++++  | Secondary signals |
| rs113533024 | rs9397437,rs2747652 | 6q25.1 | 6 | 152346190 | T    | TC   | 0.4452 | 1.06 (1.04-1.09) | 7.18E-06 | 3.41E-09 | +++++++? | Secondary signals |
| rs3020425   | rs9397437,rs2747652 | 6q25.1 | 6 | 152353512 | T    | C    | 0.4417 | 1.06 (1.03-1.09) | 8.68E-06 | 4.91E-09 | +++++++  | Secondary signals |
| rs3020426   | rs9397437,rs2747652 | 6q25.1 | 6 | 152353642 | G    | A    | 0.5583 | 0.94 (0.92-0.97) | 4.98E-06 | 3.58E-09 | +-----   | Secondary signals |
| rs11155828  | rs9397437,rs2747652 | 6q25.1 | 6 | 152353765 | G    | A    | 0.5571 | 0.94 (0.92-0.97) | 6.14E-06 | 4.01E-09 | +-----   | Secondary signals |
| rs9383604   | rs9397437,rs2747652 | 6q25.1 | 6 | 152354307 | G    | A    | 0.5579 | 0.94 (0.92-0.97) | 7.66E-06 | 4.60E-09 | +-----   | Secondary signals |



|                      |                     |        |   |           |        |      |        |                  |          |          |           |                   |
|----------------------|---------------------|--------|---|-----------|--------|------|--------|------------------|----------|----------|-----------|-------------------|
| rs9383959            | rs9397437,rs2747652 | 6q25.1 | 6 | 152354695 | T      | C    | 0.445  | 1.06 (1.04-1.09) | 5.22E-06 | 4.56E-09 | +++++++?+ | Secondary signals |
| rs79388591           | rs9397437,rs2747652 | 6q25.1 | 6 | 152355649 | GT     | G    | 0.67   | 0.94 (0.91-0.97) | 2.14E-05 | 3.38E-06 | -----?-   | Secondary signals |
| rs926778             | rs9397437,rs2747652 | 6q25.1 | 6 | 152355782 | A      | C    | 0.4441 | 1.06 (1.03-1.09) | 7.55E-06 | 1.58E-09 | +++++++   | Secondary signals |
| rs926779             | rs9397437,rs2747652 | 6q25.1 | 6 | 152355920 | A      | G    | 0.4441 | 1.06 (1.03-1.09) | 7.55E-06 | 1.58E-09 | +++++++   | Secondary signals |
| rs2982708            | rs9397437,rs2747652 | 6q25.1 | 6 | 152356220 | C      | T    | 0.5561 | 0.94 (0.92-0.97) | 6.29E-06 | 1.80E-09 | -----     | Secondary signals |
| rs6941835            | rs9397437,rs2747652 | 6q25.1 | 6 | 152356270 | G      | A    | 0.6702 | 0.94 (0.92-0.97) | 4.97E-05 | 8.09E-06 | -----     | Secondary signals |
| rs2860321            | rs9397437,rs2747652 | 6q25.1 | 6 | 152356619 | T      | C    | 0.4444 | 1.06 (1.03-1.09) | 7.64E-06 | 1.07E-09 | +++++++   | Secondary signals |
| rs3020429            | rs9397437,rs2747652 | 6q25.1 | 6 | 152356649 | T      | C    | 0.4444 | 1.06 (1.03-1.09) | 8.40E-06 | 1.13E-09 | +++++++   | Secondary signals |
| rs9397472            | rs9397437,rs2747652 | 6q25.1 | 6 | 152357047 | G      | A    | 0.6702 | 0.94 (0.92-0.97) | 4.61E-05 | 7.70E-06 | -----     | Secondary signals |
| rs2982713            | rs9397437,rs2747652 | 6q25.1 | 6 | 152359171 | A      | G    | 0.4447 | 1.06 (1.03-1.09) | 6.44E-06 | 1.32E-09 | +++++++   | Secondary signals |
| rs2982714            | rs9397437,rs2747652 | 6q25.1 | 6 | 152359331 | A      | G    | 0.4447 | 1.06 (1.03-1.09) | 6.45E-06 | 1.32E-09 | +++++++   | Secondary signals |
| rs9383961            | rs9397437,rs2747652 | 6q25.1 | 6 | 152361239 | G      | A    | 0.6701 | 0.95 (0.92-0.97) | 5.58E-05 | 8.42E-06 | -----     | Secondary signals |
| rs4289664            | rs9397437,rs2747652 | 6q25.1 | 6 | 152361383 | T      | C    | 0.33   | 1.06 (1.03-1.09) | 5.39E-05 | 7.67E-06 | +++++++   | Secondary signals |
| rs2144026            | rs9397437,rs2747652 | 6q25.1 | 6 | 152362334 | A      | G    | 0.4447 | 1.06 (1.03-1.09) | 6.81E-06 | 1.26E-09 | +++++++   | Secondary signals |
| rs60693153           | rs9397437,rs2747652 | 6q25.1 | 6 | 152366829 | C      | G    | 0.3305 | 1.06 (1.03-1.09) | 5.30E-05 | 7.83E-06 | +++++++   | Secondary signals |
| rs9341004            | rs9397437,rs2747652 | 6q25.1 | 6 | 152370248 | G      | C    | 0.6701 | 0.94 (0.92-0.97) | 4.87E-05 | 6.64E-06 | -----     | Secondary signals |
| rs11285053           | rs9397437,rs2747652 | 6q25.1 | 6 | 152379347 | T      | TA   | 0.3591 | 1.06 (1.03-1.09) | 6.75E-05 | 5.12E-09 | +++++++?+ | Secondary signals |
| rs9397482            | rs9397437,rs2747652 | 6q25.1 | 6 | 152379539 | A      | G    | 0.3304 | 1.06 (1.03-1.09) | 7.06E-05 | 7.89E-06 | +++++++   | Secondary signals |
| rs34801860           | rs9397437,rs2747652 | 6q25.1 | 6 | 152379816 | CCTGT  | C    | 0.3644 | 1.06 (1.03-1.09) | 8.86E-05 | 6.91E-09 | +++++??+  | Secondary signals |
| 6:152382087:C:CTTTTT | rs9397437,rs2747652 | 6q25.1 | 6 | 152382087 | CTTTTT | C    | 0.3348 | 1.07 (1.03-1.1)  | 2.99E-05 | 2.99E-05 | +++++???  | Secondary signals |
| rs2273207            | rs9397437,rs2747652 | 6q25.1 | 6 | 152382325 | G      | A    | 0.6696 | 0.95 (0.92-0.97) | 7.74E-05 | 8.99E-06 | -----     | Secondary signals |
| rs3798568            | rs9397437,rs2747652 | 6q25.1 | 6 | 152383383 | A      | G    | 0.3304 | 1.06 (1.03-1.09) | 7.86E-05 | 1.05E-05 | +++++++   | Secondary signals |
| rs3778080            | rs9397437,rs2747652 | 6q25.1 | 6 | 152385236 | C      | A    | 0.6697 | 0.95 (0.92-0.97) | 6.10E-05 | 9.50E-06 | -----     | Secondary signals |
| rs3778081            | rs9397437,rs2747652 | 6q25.1 | 6 | 152386628 | G      | A    | 0.6724 | 0.95 (0.92-0.97) | 9.13E-05 | 1.72E-05 | -----     | Secondary signals |
| rs6919225            | rs9397437,rs2747652 | 6q25.1 | 6 | 152386890 | C      | T    | 0.6464 | 0.95 (0.92-0.97) | 4.27E-05 | 1.14E-08 | -----+    | Secondary signals |
| rs3778082            | rs9397437,rs2747652 | 6q25.1 | 6 | 152387664 | A      | G    | 0.3537 | 1.06 (1.03-1.09) | 4.23E-05 | 5.47E-09 | ++++++++  | Secondary signals |
| rs3778084            | rs9397437,rs2747652 | 6q25.1 | 6 | 152388039 | C      | T    | 0.6464 | 0.95 (0.92-0.97) | 3.98E-05 | 7.28E-09 | -----+    | Secondary signals |
| rs3778085            | rs9397437,rs2747652 | 6q25.1 | 6 | 152388127 | G      | T    | 0.6464 | 0.95 (0.92-0.97) | 4.23E-05 | 4.91E-09 | -----+    | Secondary signals |
| rs7762662            | rs9397437,rs2747652 | 6q25.1 | 6 | 152388873 | G      | A    | 0.6464 | 0.95 (0.92-0.97) | 4.18E-05 | 9.62E-09 | -----+    | Secondary signals |
| rs3798572            | rs9397437,rs2747652 | 6q25.1 | 6 | 152389170 | A      | G    | 0.3536 | 1.06 (1.03-1.09) | 4.07E-05 | 4.50E-09 | +++++++   | Secondary signals |
| rs3798573            | rs9397437,rs2747652 | 6q25.1 | 6 | 152389362 | G      | A    | 0.6463 | 0.94 (0.92-0.97) | 3.82E-05 | 3.51E-09 | -----+    | Secondary signals |
| rs11311524           | rs9397437,rs2747652 | 6q25.1 | 6 | 152389665 | T      | TA   | 0.3546 | 1.06 (1.03-1.09) | 1.51E-05 | 1.25E-09 | +++++++?+ | Secondary signals |
| 6:152389989:C:<CN0>  | rs9397437,rs2747652 | 6q25.1 | 6 | 152389989 | <CN0>  | C    | 0.36   | 1.07 (1.04-1.1)  | 1.66E-05 | 3.35E-09 | +++++??+  | Secondary signals |
| rs373028494          | rs9397437,rs2747652 | 6q25.1 | 6 | 152392233 | C      | G    | 0.3398 | 1.06 (1.03-1.09) | 3.22E-05 | 1.63E-09 | +++++++?+ | Secondary signals |
| rs6557198            | rs9397437,rs2747652 | 6q25.1 | 6 | 152392439 | A      | G    | 0.3537 | 1.06 (1.03-1.09) | 5.18E-05 | 1.13E-08 | +++++++   | Secondary signals |
| rs6928634            | rs9397437,rs2747652 | 6q25.1 | 6 | 152392712 | G      | C    | 0.6464 | 0.95 (0.92-0.97) | 5.27E-05 | 1.48E-08 | -----+    | Secondary signals |
| rs9479190            | rs9397437,rs2747652 | 6q25.1 | 6 | 152393112 | G      | A    | 0.6465 | 0.95 (0.92-0.97) | 5.11E-05 | 1.24E-08 | -----+    | Secondary signals |
| rs9479191            | rs9397437,rs2747652 | 6q25.1 | 6 | 152393160 | G      | T    | 0.6465 | 0.95 (0.92-0.97) | 5.10E-05 | 1.38E-08 | -----+    | Secondary signals |
| rs9479192            | rs9397437,rs2747652 | 6q25.1 | 6 | 152393173 | T      | C    | 0.3535 | 1.06 (1.03-1.09) | 5.28E-05 | 1.03E-08 | +++++++   | Secondary signals |
| rs376582138          | rs9397437,rs2747652 | 6q25.1 | 6 | 152393218 | C      | CGCT | 0.6455 | 0.94 (0.91-0.97) | 1.73E-05 | 3.73E-09 | -----?-   | Secondary signals |
| rs12055837           | rs9397437,rs2747652 | 6q25.1 | 6 | 152393367 | T      | A    | 0.6465 | 0.95 (0.92-0.97) | 5.20E-05 | 1.40E-08 | -----+    | Secondary signals |
| rs9397483            | rs9397437,rs2747652 | 6q25.1 | 6 | 152393650 | G      | A    | 0.6465 | 0.95 (0.92-0.97) | 5.19E-05 | 1.40E-08 | -----+    | Secondary signals |
| rs3778087            | rs9397437,rs2747652 | 6q25.1 | 6 | 152393707 | T      | G    | 0.3535 | 1.06 (1.03-1.09) | 5.23E-05 | 1.40E-08 | +++++++   | Secondary signals |
| rs3778088            | rs9397437,rs2747652 | 6q25.1 | 6 | 152393721 | A      | G    | 0.3537 | 1.06 (1.03-1.09) | 5.74E-05 | 1.51E-08 | +++++++   | Secondary signals |
| rs3778089            | rs9397437,rs2747652 | 6q25.1 | 6 | 152393761 | A      | G    | 0.354  | 1.06 (1.03-1.09) | 6.41E-05 | 1.64E-08 | +++++++   | Secondary signals |
| rs9397484            | rs9397437,rs2747652 | 6q25.1 | 6 | 152394237 | C      | T    | 0.6464 | 0.95 (0.92-0.97) | 4.82E-05 | 1.26E-08 | -----     | Secondary signals |
| rs35396879           | rs9397437,rs2747652 | 6q25.1 | 6 | 152394332 | GA     | G    | 0.6454 | 0.94 (0.91-0.97) | 1.70E-05 | 3.68E-09 | -----?-   | Secondary signals |
| rs9478274            | rs9397437,rs2747652 | 6q25.1 | 6 | 152394525 | G      | A    | 0.6464 | 0.95 (0.92-0.97) | 4.92E-05 | 1.28E-08 | -----+    | Secondary signals |
| rs9479193            | rs9397437,rs2747652 | 6q25.1 | 6 | 152394779 | A      | G    | 0.3536 | 1.06 (1.03-1.09) | 5.09E-05 | 1.37E-08 | +++++++   | Secondary signals |
| rs9479194            | rs9397437,rs2747652 | 6q25.1 | 6 | 152395139 | A      | G    | 0.3536 | 1.06 (1.03-1.09) | 5.08E-05 | 1.37E-08 | +++++++   | Secondary signals |
| rs9478276            | rs9397437,rs2747652 | 6q25.1 | 6 | 152395187 | T      | C    | 0.3536 | 1.06 (1.03-1.09) | 5.08E-05 | 1.37E-08 | +++++++   | Secondary signals |

|             |                     |        |   |           |        |   |        |                  |          |          |          |                   |
|-------------|---------------------|--------|---|-----------|--------|---|--------|------------------|----------|----------|----------|-------------------|
| rs9479195   | rs9397437,rs2747652 | 6q25.1 | 6 | 152395269 | C      | T | 0.6464 | 0.95 (0.92-0.97) | 5.08E-05 | 1.37E-08 | -----+   | Secondary signals |
| rs7776315   | rs9397437,rs2747652 | 6q25.1 | 6 | 152395348 | T      | C | 0.3536 | 1.06 (1.03-1.09) | 5.08E-05 | 1.37E-08 | ++++++++ | Secondary signals |
| rs7757959   | rs9397437,rs2747652 | 6q25.1 | 6 | 152395535 | G      | A | 0.6464 | 0.95 (0.92-0.97) | 5.07E-05 | 1.37E-08 | -----+   | Secondary signals |
| rs7766205   | rs9397437,rs2747652 | 6q25.1 | 6 | 152395770 | C      | T | 0.6464 | 0.95 (0.92-0.97) | 5.07E-05 | 1.37E-08 | -----+   | Secondary signals |
| rs7766550   | rs9397437,rs2747652 | 6q25.1 | 6 | 152395965 | C      | T | 0.6465 | 0.95 (0.92-0.97) | 5.07E-05 | 1.37E-08 | -----+   | Secondary signals |
| rs7766577   | rs9397437,rs2747652 | 6q25.1 | 6 | 152396013 | C      | T | 0.6464 | 0.95 (0.92-0.97) | 5.06E-05 | 1.37E-08 | -----+   | Secondary signals |
| rs7766585   | rs9397437,rs2747652 | 6q25.1 | 6 | 152396036 | T      | G | 0.6465 | 0.95 (0.92-0.97) | 5.08E-05 | 5.08E-05 | -----?   | Secondary signals |
| rs78028948  | rs9397437,rs2747652 | 6q25.1 | 6 | 152396108 | C      | T | 0.6464 | 0.95 (0.92-0.97) | 5.06E-05 | 1.37E-08 | -----+   | Secondary signals |
| rs77870622  | rs9397437,rs2747652 | 6q25.1 | 6 | 152396141 | A      | T | 0.3531 | 1.06 (1.03-1.09) | 4.67E-05 | 1.29E-08 | ++++++++ | Secondary signals |
| rs3798575   | rs9397437,rs2747652 | 6q25.1 | 6 | 152396403 | G      | A | 0.6464 | 0.95 (0.92-0.97) | 5.04E-05 | 1.37E-08 | -----+   | Secondary signals |
| rs3798576   | rs9397437,rs2747652 | 6q25.1 | 6 | 152396586 | C      | T | 0.6464 | 0.95 (0.92-0.97) | 5.04E-05 | 1.36E-08 | -----+   | Secondary signals |
| rs9479196   | rs9397437,rs2747652 | 6q25.1 | 6 | 152396940 | T      | C | 0.3537 | 1.06 (1.03-1.09) | 4.86E-05 | 2.40E-08 | ++++++++ | Secondary signals |
| rs67737839  | rs9397437,rs2747652 | 6q25.1 | 6 | 152396945 | T      | C | 0.3537 | 1.06 (1.03-1.09) | 4.77E-05 | 2.37E-08 | ++++++++ | Secondary signals |
| rs9478279   | rs9397437,rs2747652 | 6q25.1 | 6 | 152396950 | A      | G | 0.3532 | 1.06 (1.03-1.09) | 4.54E-05 | 1.21E-08 | ++++++++ | Secondary signals |
| rs9479197   | rs9397437,rs2747652 | 6q25.1 | 6 | 152397092 | C      | T | 0.6464 | 0.95 (0.92-0.97) | 5.09E-05 | 1.38E-08 | -----+   | Secondary signals |
| rs9479198   | rs9397437,rs2747652 | 6q25.1 | 6 | 152397134 | C      | T | 0.6464 | 0.95 (0.92-0.97) | 5.11E-05 | 1.38E-08 | -----+   | Secondary signals |
| rs9479199   | rs9397437,rs2747652 | 6q25.1 | 6 | 152397278 | G      | A | 0.6461 | 0.95 (0.92-0.97) | 5.44E-05 | 1.46E-08 | +-----+  | Secondary signals |
| rs34777288  | rs9397437,rs2747652 | 6q25.1 | 6 | 152397463 | T      | C | 0.354  | 1.06 (1.03-1.09) | 5.53E-05 | 1.04E-08 | ++++++++ | Secondary signals |
| rs35237247  | rs9397437,rs2747652 | 6q25.1 | 6 | 152397584 | G      | A | 0.6467 | 0.95 (0.92-0.97) | 4.86E-05 | 1.34E-08 | +-----+  | Secondary signals |
| rs34322424  | rs9397437,rs2747652 | 6q25.1 | 6 | 152397602 | G      | A | 0.6466 | 0.95 (0.92-0.97) | 4.87E-05 | 1.34E-08 | +-----+  | Secondary signals |
| rs36083386  | rs9397437,rs2747652 | 6q25.1 | 6 | 152397912 | AC     | A | 0.6452 | 0.94 (0.91-0.97) | 1.80E-05 | 3.86E-09 | +-----?  | Secondary signals |
| rs13211322  | rs9397437,rs2747652 | 6q25.1 | 6 | 152398050 | C      | A | 0.6468 | 0.94 (0.92-0.97) | 4.18E-05 | 1.27E-08 | +-----+  | Secondary signals |
| rs13211638  | rs9397437,rs2747652 | 6q25.1 | 6 | 152398051 | A      | G | 0.3532 | 1.06 (1.03-1.09) | 4.19E-05 | 1.27E-08 | ++++++++ | Secondary signals |
| rs13211433  | rs9397437,rs2747652 | 6q25.1 | 6 | 152398079 | T      | C | 0.3545 | 1.06 (1.03-1.09) | 4.74E-05 | 1.25E-08 | ++++++++ | Secondary signals |
| rs9478280   | rs9397437,rs2747652 | 6q25.1 | 6 | 152398221 | T      | C | 0.3543 | 1.06 (1.03-1.09) | 4.69E-05 | 1.30E-08 | ++++++++ | Secondary signals |
| rs111769614 | rs9397437,rs2747652 | 6q25.1 | 6 | 152398345 | AGCTCG | A | 0.6406 | 0.94 (0.91-0.97) | 1.92E-05 | 8.01E-09 | +-----?  | Secondary signals |
| rs9478281   | rs9397437,rs2747652 | 6q25.1 | 6 | 152398414 | T      | C | 0.3539 | 1.06 (1.03-1.09) | 5.51E-05 | 1.47E-08 | ++++++++ | Secondary signals |
| rs9479200   | rs9397437,rs2747652 | 6q25.1 | 6 | 152398505 | G      | A | 0.6461 | 0.95 (0.92-0.97) | 5.51E-05 | 1.47E-08 | +-----+  | Secondary signals |
| rs9478282   | rs9397437,rs2747652 | 6q25.1 | 6 | 152398669 | T      | C | 0.3519 | 1.06 (1.03-1.09) | 4.52E-05 | 1.53E-08 | ++++++++ | Secondary signals |
| rs9479201   | rs9397437,rs2747652 | 6q25.1 | 6 | 152398670 | G      | A | 0.6476 | 0.94 (0.92-0.97) | 4.55E-05 | 1.46E-08 | +-----+  | Secondary signals |
| rs35807076  | rs9397437,rs2747652 | 6q25.1 | 6 | 152398814 | C      | G | 0.3296 | 1.06 (1.03-1.09) | 8.13E-05 | 1.02E-05 | ++++++++ | Secondary signals |
| rs9478283   | rs9397437,rs2747652 | 6q25.1 | 6 | 152398934 | A      | G | 0.354  | 1.06 (1.03-1.09) | 5.55E-05 | 1.56E-08 | ++++++++ | Secondary signals |
| rs9478284   | rs9397437,rs2747652 | 6q25.1 | 6 | 152398963 | C      | G | 0.3539 | 1.06 (1.03-1.09) | 5.45E-05 | 1.45E-08 | ++++++++ | Secondary signals |
| rs75819951  | rs9397437,rs2747652 | 6q25.1 | 6 | 152399345 | A      | G | 0.3539 | 1.06 (1.03-1.09) | 5.33E-05 | 1.44E-08 | ++++++++ | Secondary signals |
| rs9478286   | rs9397437,rs2747652 | 6q25.1 | 6 | 152399520 | A      | G | 0.3542 | 1.06 (1.03-1.09) | 5.47E-05 | 1.66E-08 | ++++++++ | Secondary signals |
| rs35525869  | rs9397437,rs2747652 | 6q25.1 | 6 | 152399523 | T      | C | 0.3542 | 1.06 (1.03-1.09) | 5.47E-05 | 1.66E-08 | ++++++++ | Secondary signals |
| rs35650978  | rs9397437,rs2747652 | 6q25.1 | 6 | 152399556 | A      | G | 0.3542 | 1.06 (1.03-1.09) | 5.62E-05 | 1.70E-08 | ++++++++ | Secondary signals |
| rs35498177  | rs9397437,rs2747652 | 6q25.1 | 6 | 152399690 | A      | G | 0.3541 | 1.06 (1.03-1.09) | 5.51E-05 | 1.48E-08 | ++++++++ | Secondary signals |
| rs35156982  | rs9397437,rs2747652 | 6q25.1 | 6 | 152399792 | G      | C | 0.6459 | 0.95 (0.92-0.97) | 5.51E-05 | 1.48E-08 | +-----+  | Secondary signals |
| rs9479202   | rs9397437,rs2747652 | 6q25.1 | 6 | 152400248 | G      | C | 0.6462 | 0.95 (0.92-0.97) | 5.52E-05 | 1.48E-08 | +-----+  | Secondary signals |
| rs9479203   | rs9397437,rs2747652 | 6q25.1 | 6 | 152400259 | A      | G | 0.3539 | 1.06 (1.03-1.09) | 5.68E-05 | 1.52E-08 | ++++++++ | Secondary signals |
| rs9479204   | rs9397437,rs2747652 | 6q25.1 | 6 | 152400529 | A      | G | 0.3541 | 1.06 (1.03-1.09) | 5.64E-05 | 1.66E-08 | ++++++++ | Secondary signals |
| rs9479205   | rs9397437,rs2747652 | 6q25.1 | 6 | 152400595 | G      | A | 0.6458 | 0.95 (0.92-0.97) | 5.64E-05 | 1.66E-08 | +-----+  | Secondary signals |
| rs9479206   | rs9397437,rs2747652 | 6q25.1 | 6 | 152400760 | T      | A | 0.647  | 0.95 (0.92-0.97) | 5.03E-05 | 1.53E-08 | +-----+  | Secondary signals |
| rs9479207   | rs9397437,rs2747652 | 6q25.1 | 6 | 152400982 | G      | A | 0.6458 | 0.95 (0.92-0.97) | 5.67E-05 | 1.67E-08 | +-----+  | Secondary signals |
| rs9479208   | rs9397437,rs2747652 | 6q25.1 | 6 | 152401171 | C      | T | 0.6458 | 0.95 (0.92-0.97) | 5.56E-05 | 1.65E-08 | +-----+  | Secondary signals |
| rs9479209   | rs9397437,rs2747652 | 6q25.1 | 6 | 152401385 | T      | C | 0.3543 | 1.06 (1.03-1.09) | 5.69E-05 | 1.68E-08 | ++++++++ | Secondary signals |
| rs140646696 | rs9397437,rs2747652 | 6q25.1 | 6 | 152401437 | AC     | A | 0.6449 | 0.94 (0.91-0.97) | 1.91E-05 | 4.29E-09 | +-----?  | Secondary signals |
| rs9479210   | rs9397437,rs2747652 | 6q25.1 | 6 | 152401651 | G      | A | 0.6458 | 0.95 (0.92-0.97) | 5.70E-05 | 1.68E-08 | +-----+  | Secondary signals |
| rs9479213   | rs9397437,rs2747652 | 6q25.1 | 6 | 152402201 | T      | C | 0.3543 | 1.06 (1.03-1.09) | 5.71E-05 | 1.49E-08 | ++++++++ | Secondary signals |
| rs9479214   | rs9397437,rs2747652 | 6q25.1 | 6 | 152402326 | C      | T | 0.6466 | 0.95 (0.92-0.97) | 4.91E-05 | 1.51E-08 | +-----+  | Secondary signals |

|             |                     |        |   |           |   |          |        |                  |          |          |            |                   |
|-------------|---------------------|--------|---|-----------|---|----------|--------|------------------|----------|----------|------------|-------------------|
| rs9478287   | rs9397437,rs2747652 | 6q25.1 | 6 | 152402382 | A | T        | 0.3539 | 1.06 (1.03-1.09) | 5.08E-05 | 1.55E-08 | +++++++    | Secondary signals |
| rs9478288   | rs9397437,rs2747652 | 6q25.1 | 6 | 152402457 | C | G        | 0.3545 | 1.06 (1.03-1.09) | 5.44E-05 | 1.64E-08 | +++++++    | Secondary signals |
| rs9479215   | rs9397437,rs2747652 | 6q25.1 | 6 | 152402987 | T | C        | 0.3547 | 1.06 (1.03-1.09) | 5.64E-05 | 1.87E-08 | +++++++    | Secondary signals |
| rs9479216   | rs9397437,rs2747652 | 6q25.1 | 6 | 152403128 | A | C        | 0.3545 | 1.06 (1.03-1.09) | 5.86E-05 | 1.72E-08 | +++++++    | Secondary signals |
| rs12175682  | rs9397437,rs2747652 | 6q25.1 | 6 | 152403253 | T | C        | 0.3297 | 1.06 (1.03-1.09) | 6.57E-05 | 8.97E-06 | +++++++    | Secondary signals |
| rs9479217   | rs9397437,rs2747652 | 6q25.1 | 6 | 152403390 | T | C        | 0.3544 | 1.06 (1.03-1.09) | 5.73E-05 | 1.70E-08 | +++++++    | Secondary signals |
| rs9479218   | rs9397437,rs2747652 | 6q25.1 | 6 | 152403418 | C | T        | 0.6456 | 0.95 (0.92-0.97) | 5.74E-05 | 1.70E-08 | +-----     | Secondary signals |
| rs138747530 | rs9397437,rs2747652 | 6q25.1 | 6 | 152403644 | T | C        | 0.3545 | 1.06 (1.03-1.09) | 5.91E-05 | 1.83E-08 | +++++++    | Secondary signals |
| rs144673118 | rs9397437,rs2747652 | 6q25.1 | 6 | 152403698 | C | T        | 0.6458 | 0.95 (0.92-0.97) | 5.76E-05 | 1.70E-08 | +-----     | Secondary signals |
| rs141661612 | rs9397437,rs2747652 | 6q25.1 | 6 | 152403759 | G | A        | 0.6464 | 0.95 (0.92-0.97) | 5.13E-05 | 1.57E-08 | +-----     | Secondary signals |
| rs138555265 | rs9397437,rs2747652 | 6q25.1 | 6 | 152404238 | G | GA       | 0.3554 | 1.06 (1.03-1.09) | 1.99E-05 | 4.71E-09 | +++++++?   | Secondary signals |
| rs141867918 | rs9397437,rs2747652 | 6q25.1 | 6 | 152404528 | G | A        | 0.6477 | 0.95 (0.92-0.97) | 6.44E-05 | 1.99E-08 | +-----     | Secondary signals |
| rs35084216  | rs9397437,rs2747652 | 6q25.1 | 6 | 152404784 | G | A        | 0.6454 | 0.95 (0.92-0.97) | 5.89E-05 | 1.83E-08 | +-----     | Secondary signals |
| rs58461766  | rs9397437,rs2747652 | 6q25.1 | 6 | 152404868 | C | A        | 0.6454 | 0.95 (0.92-0.97) | 5.88E-05 | 1.83E-08 | +-----     | Secondary signals |
| rs34075826  | rs9397437,rs2747652 | 6q25.1 | 6 | 152404924 | G | T        | 0.6454 | 0.95 (0.92-0.97) | 5.89E-05 | 1.83E-08 | +-----     | Secondary signals |
| rs9397081   | rs9397437,rs2747652 | 6q25.1 | 6 | 152405299 | C | T        | 0.6454 | 0.95 (0.92-0.97) | 5.91E-05 | 1.84E-08 | +-----     | Secondary signals |
| rs59223084  | rs9397437,rs2747652 | 6q25.1 | 6 | 152405567 | A | G        | 0.3512 | 1.06 (1.03-1.09) | 4.84E-05 | 1.37E-08 | +++++++    | Secondary signals |
| rs11155832  | rs9397437,rs2747652 | 6q25.1 | 6 | 152405607 | T | C        | 0.3519 | 1.06 (1.03-1.09) | 6.95E-05 | 2.01E-08 | +++++++    | Secondary signals |
| rs11155833  | rs9397437,rs2747652 | 6q25.1 | 6 | 152405608 | G | A        | 0.6481 | 0.95 (0.92-0.97) | 6.96E-05 | 2.01E-08 | +-----     | Secondary signals |
| rs13192678  | rs9397437,rs2747652 | 6q25.1 | 6 | 152405910 | T | C        | 0.3547 | 1.06 (1.03-1.09) | 5.79E-05 | 1.82E-08 | +++++++    | Secondary signals |
| rs3822990   | rs9397437,rs2747652 | 6q25.1 | 6 | 152405965 | T | C        | 0.3297 | 1.06 (1.03-1.09) | 8.61E-05 | 9.63E-06 | +++++++    | Secondary signals |
| rs3842100   | rs9397437,rs2747652 | 6q25.1 | 6 | 152406538 | G | GA       | 0.3301 | 1.06 (1.03-1.09) | 4.49E-05 | 4.34E-06 | +++++++?   | Secondary signals |
| rs35494677  | rs9397437,rs2747652 | 6q25.1 | 6 | 152406628 | G | A        | 0.6703 | 0.95 (0.92-0.97) | 8.63E-05 | 9.65E-06 | +-----     | Secondary signals |
| rs66465244  | rs9397437,rs2747652 | 6q25.1 | 6 | 152407061 | C | A        | 0.6703 | 0.95 (0.92-0.97) | 8.61E-05 | 8.97E-06 | +-----     | Secondary signals |
| rs67933127  | rs9397437,rs2747652 | 6q25.1 | 6 | 152407150 | T | A        | 0.6709 | 0.95 (0.92-0.97) | 7.49E-05 | 8.18E-06 | +-----     | Secondary signals |
| rs13201080  | rs9397437,rs2747652 | 6q25.1 | 6 | 152407782 | C | G        | 0.3296 | 1.06 (1.03-1.09) | 7.97E-05 | 8.47E-06 | +++++++    | Secondary signals |
| rs17082104  | rs9397437,rs2747652 | 6q25.1 | 6 | 152407839 | A | G        | 0.3296 | 1.06 (1.03-1.09) | 7.96E-05 | 8.47E-06 | +++++++    | Secondary signals |
| rs3778090   | rs9397437,rs2747652 | 6q25.1 | 6 | 152408028 | T | C        | 0.3296 | 1.06 (1.03-1.09) | 7.94E-05 | 7.87E-06 | +++++++    | Secondary signals |
| rs3778092   | rs9397437,rs2747652 | 6q25.1 | 6 | 152408273 | G | A        | 0.6704 | 0.95 (0.92-0.97) | 7.99E-05 | 7.91E-06 | +-----     | Secondary signals |
| rs9322355   | rs9397437,rs2747652 | 6q25.1 | 6 | 152408649 | T | C        | 0.3296 | 1.06 (1.03-1.09) | 7.79E-05 | 7.50E-06 | +++++++    | Secondary signals |
| rs9322357   | rs9397437,rs2747652 | 6q25.1 | 6 | 152409236 | T | G        | 0.3294 | 1.06 (1.03-1.09) | 7.98E-05 | 7.15E-06 | +++++++    | Secondary signals |
| rs9322359   | rs9397437,rs2747652 | 6q25.1 | 6 | 152410022 | T | A        | 0.6706 | 0.95 (0.92-0.97) | 7.46E-05 | 7.11E-06 | +-----     | Secondary signals |
| rs3778093   | rs9397437,rs2747652 | 6q25.1 | 6 | 152411179 | A | G        | 0.3283 | 1.06 (1.03-1.09) | 7.90E-05 | 5.55E-06 | +++++++    | Secondary signals |
| rs3778094   | rs9397437,rs2747652 | 6q25.1 | 6 | 152411198 | T | C        | 0.328  | 1.06 (1.03-1.09) | 7.26E-05 | 5.06E-06 | +++++++    | Secondary signals |
| rs1523396   | rs6964587           | 7q21.2 | 7 | 91400387  | C | G        | 0.3768 | 0.94 (0.91-0.97) | 1.11E-05 | 5.37E-05 | +-----?--- | Better signals    |
| rs11763307  | rs6964587           | 7q21.2 | 7 | 91408398  | G | A        | 0.6231 | 1.07 (1.04-1.1)  | 6.42E-06 | 5.82E-05 | +++++?+++  | Better signals    |
| rs4729001   | rs6964587           | 7q21.2 | 7 | 91413417  | C | T        | 0.623  | 1.07 (1.04-1.1)  | 6.77E-06 | 6.18E-05 | +++++?+++  | Better signals    |
| rs17164125  | rs6964587           | 7q21.2 | 7 | 91417796  | C | T        | 0.6222 | 1.07 (1.04-1.1)  | 6.54E-06 | 4.83E-05 | +++++?+++  | Better signals    |
| rs4729006   | rs6964587           | 7q21.2 | 7 | 91429600  | C | T        | 0.6225 | 1.07 (1.04-1.1)  | 9.49E-06 | 4.66E-05 | +++++?+++  | Better signals    |
| rs11772428  | rs6964587           | 7q21.2 | 7 | 91435316  | A | G        | 0.348  | 0.94 (0.92-0.97) | 8.19E-05 | 1.74E-04 | +-----?--- | Better signals    |
| rs10239125  | rs6964587           | 7q21.2 | 7 | 91447692  | G | T        | 0.6329 | 1.07 (1.04-1.1)  | 1.32E-05 | 7.08E-05 | +++++?+++  | Better signals    |
| rs974508    | rs6964587           | 7q21.2 | 7 | 91448017  | T | C        | 0.3667 | 0.94 (0.91-0.97) | 1.75E-05 | 1.15E-04 | +-----?--- | Better signals    |
| rs12666939  | rs6964587           | 7q21.2 | 7 | 91448958  | G | C        | 0.6335 | 1.06 (1.03-1.1)  | 1.91E-05 | 8.83E-05 | +++++?+++  | Better signals    |
| rs17164154  | rs6964587           | 7q21.2 | 7 | 91474788  | C | T        | 0.6415 | 1.06 (1.03-1.09) | 4.76E-05 | 1.19E-04 | +++++++    | Better signals    |
| rs2282973   | rs6964587           | 7q21.2 | 7 | 91666661  | C | A        | 0.6513 | 1.06 (1.03-1.09) | 5.69E-05 | 6.65E-04 | +++++++    | Better signals    |
| rs2049900   | rs6964587           | 7q21.2 | 7 | 91738788  | G | C        | 0.6503 | 1.06 (1.03-1.09) | 6.45E-05 | 6.97E-04 | +++++++    | Better signals    |
| rs36190962  | rs514192            | 8q22.3 | 8 | 102636399 | T | TCACAGTA | 0.0922 | 0.9 (0.85-0.95)  | 8.12E-05 | 1.47E-07 | +-----???  | Secondary signals |
| rs13273977  | rs514192            | 8q22.3 | 8 | 102639989 | C | T        | 0.9084 | 1.1 (1.05-1.16)  | 4.59E-05 | 1.21E-07 | +++++?+++  | Secondary signals |
| rs57645087  | rs514192            | 8q22.3 | 8 | 102644978 | A | G        | 0.9106 | 1.11 (1.05-1.16) | 4.38E-05 | 4.01E-07 | +++++?+++  | Secondary signals |
| rs2226400   | rs514192            | 8q22.3 | 8 | 102646352 | G | A        | 0.9084 | 1.11 (1.05-1.16) | 3.11E-05 | 1.18E-07 | +++++?+++  | Better signals    |
| rs2211917   | rs514192            | 8q22.3 | 8 | 102646403 | A | G        | 0.0915 | 0.91 (0.86-0.95) | 3.77E-05 | 1.30E-07 | +-----?+++ | Secondary signals |

|                 |           |        |   |           |     |    |        |                  |          |          |           |                   |
|-----------------|-----------|--------|---|-----------|-----|----|--------|------------------|----------|----------|-----------|-------------------|
| rs73699536      | rs514192  | 8q22.3 | 8 | 102647183 | A   | G  | 0.0893 | 0.9 (0.86-0.95)  | 3.83E-05 | 4.30E-07 | +----?+-  | Secondary signals |
| rs7010796       | rs514192  | 8q22.3 | 8 | 102647858 | G   | A  | 0.9085 | 1.1 (1.05-1.16)  | 3.99E-05 | 1.08E-07 | +++++?++  | Secondary signals |
| rs57337051      | rs514192  | 8q22.3 | 8 | 102648282 | A   | T  | 0.0913 | 0.9 (0.86-0.95)  | 3.41E-05 | 1.14E-07 | +----?+-  | Secondary signals |
| rs11993425      | rs514192  | 8q22.3 | 8 | 102648755 | T   | C  | 0.0912 | 0.91 (0.86-0.95) | 3.78E-05 | 1.01E-07 | +----?+-  | Secondary signals |
| rs2211916       | rs514192  | 8q22.3 | 8 | 102649304 | T   | C  | 0.0911 | 0.9 (0.86-0.95)  | 3.48E-05 | 8.03E-08 | +----?+-  | Secondary signals |
| rs35234521      | rs514192  | 8q22.3 | 8 | 102649427 | C   | G  | 0.0913 | 0.91 (0.86-0.95) | 3.63E-05 | 1.12E-07 | +----?+-  | Secondary signals |
| rs11995278      | rs514192  | 8q22.3 | 8 | 102650107 | A   | G  | 0.0913 | 0.9 (0.86-0.95)  | 3.39E-05 | 1.02E-07 | +----?+-  | Secondary signals |
| rs11995290      | rs514192  | 8q22.3 | 8 | 102650321 | T   | C  | 0.0913 | 0.9 (0.86-0.95)  | 3.38E-05 | 9.88E-08 | +----?+-  | Secondary signals |
| rs11995361      | rs514192  | 8q22.3 | 8 | 102650378 | C   | G  | 0.0913 | 0.9 (0.86-0.95)  | 3.41E-05 | 3.41E-05 | +----?+-  | Secondary signals |
| rs11995402      | rs514192  | 8q22.3 | 8 | 102650508 | T   | G  | 0.0912 | 0.9 (0.86-0.95)  | 3.06E-05 | 8.91E-08 | +----?+-  | Better signals    |
| rs11995403      | rs514192  | 8q22.3 | 8 | 102650509 | T   | G  | 0.0912 | 0.9 (0.86-0.95)  | 3.05E-05 | 8.90E-08 | +----?+-  | Better signals    |
| rs71518834      | rs514192  | 8q22.3 | 8 | 102650594 | G   | A  | 0.9088 | 1.11 (1.05-1.16) | 3.04E-05 | 8.86E-08 | +++++?++  | Better signals    |
| rs10087735      | rs514192  | 8q22.3 | 8 | 102650701 | C   | T  | 0.9088 | 1.11 (1.05-1.16) | 3.03E-05 | 8.84E-08 | +++++?++  | Better signals    |
| rs10101105      | rs514192  | 8q22.3 | 8 | 102650750 | G   | C  | 0.9088 | 1.11 (1.06-1.16) | 2.98E-05 | 8.74E-08 | +++++?++  | Better signals    |
| rs10101116      | rs514192  | 8q22.3 | 8 | 102650795 | T   | C  | 0.0912 | 0.9 (0.86-0.95)  | 2.90E-05 | 8.55E-08 | +----?+-  | Better signals    |
| rs2892327       | rs514192  | 8q22.3 | 8 | 102650879 | G   | A  | 0.9088 | 1.11 (1.06-1.16) | 2.82E-05 | 8.37E-08 | +++++?++  | Better signals    |
| rs2892326       | rs514192  | 8q22.3 | 8 | 102650942 | A   | G  | 0.0912 | 0.9 (0.86-0.95)  | 2.80E-05 | 8.33E-08 | +----?+-  | Better signals    |
| rs2186391       | rs514192  | 8q22.3 | 8 | 102650993 | T   | C  | 0.0913 | 0.9 (0.86-0.95)  | 2.93E-05 | 2.93E-05 | +----?+-  | Better signals    |
| rs2154651       | rs514192  | 8q22.3 | 8 | 102651070 | A   | G  | 0.0912 | 0.9 (0.86-0.95)  | 2.74E-05 | 8.04E-08 | +----?+-  | Better signals    |
| rs2154650       | rs514192  | 8q22.3 | 8 | 102651199 | G   | C  | 0.9088 | 1.11 (1.05-1.16) | 2.92E-05 | 1.06E-07 | +++++?++  | Better signals    |
| rs1111883       | rs514192  | 8q22.3 | 8 | 102651383 | G   | A  | 0.9095 | 1.11 (1.06-1.16) | 2.88E-05 | 1.41E-07 | +++++?++  | Better signals    |
| rs3029410       | rs514192  | 8q22.3 | 8 | 102651532 | AGT | A  | 0.9086 | 1.12 (1.07-1.18) | 7.47E-06 | 5.47E-08 | +++++?++  | Better signals    |
| rs1111882       | rs514192  | 8q22.3 | 8 | 102651611 | T   | C  | 0.0912 | 0.9 (0.86-0.95)  | 2.93E-05 | 8.64E-08 | +----?+-  | Better signals    |
| rs35477966      | rs514192  | 8q22.3 | 8 | 102651767 | G   | A  | 0.9088 | 1.11 (1.05-1.16) | 2.97E-05 | 1.12E-07 | +++++?++  | Better signals    |
| rs6986280       | rs514192  | 8q22.3 | 8 | 102651937 | A   | T  | 0.0912 | 0.9 (0.86-0.95)  | 2.82E-05 | 8.39E-08 | +----?+-  | Better signals    |
| rs7004970       | rs514192  | 8q22.3 | 8 | 102652236 | C   | G  | 0.0912 | 0.9 (0.86-0.95)  | 2.87E-05 | 8.52E-08 | +----?+-  | Better signals    |
| rs6986959       | rs514192  | 8q22.3 | 8 | 102652368 | C   | T  | 0.9088 | 1.11 (1.05-1.16) | 3.13E-05 | 9.60E-08 | +++++?++  | Better signals    |
| rs34328475      | rs514192  | 8q22.3 | 8 | 102652531 | A   | G  | 0.0911 | 0.9 (0.86-0.95)  | 2.74E-05 | 2.74E-05 | +----?+-  | Better signals    |
| rs10955267      | rs514192  | 8q22.3 | 8 | 102652602 | C   | T  | 0.9089 | 1.11 (1.06-1.16) | 2.86E-05 | 4.65E-08 | +++++?++  | Better signals    |
| rs7839359       | rs514192  | 8q22.3 | 8 | 102653318 | C   | G  | 0.0897 | 0.9 (0.86-0.95)  | 1.90E-05 | 7.14E-08 | +----?+-  | Better signals    |
| rs7839123       | rs514192  | 8q22.3 | 8 | 102653327 | G   | A  | 0.9103 | 1.11 (1.06-1.16) | 1.88E-05 | 7.08E-08 | +++++?++  | Better signals    |
| rs7839494       | rs514192  | 8q22.3 | 8 | 102653358 | T   | G  | 0.0897 | 0.9 (0.86-0.95)  | 1.90E-05 | 7.14E-08 | +----?+-  | Better signals    |
| rs7839287       | rs514192  | 8q22.3 | 8 | 102653487 | G   | A  | 0.9104 | 1.11 (1.06-1.16) | 1.77E-05 | 5.09E-08 | +++++?++  | Better signals    |
| rs7839801       | rs514192  | 8q22.3 | 8 | 102653530 | C   | G  | 0.0896 | 0.9 (0.86-0.94)  | 1.79E-05 | 5.13E-08 | +----?+-  | Better signals    |
| rs7839563       | rs514192  | 8q22.3 | 8 | 102653575 | T   | C  | 0.0896 | 0.9 (0.86-0.94)  | 1.80E-05 | 5.65E-08 | +----?+-  | Better signals    |
| rs35628299      | rs514192  | 8q22.3 | 8 | 102653881 | A   | G  | 0.0895 | 0.9 (0.86-0.94)  | 1.72E-05 | 6.13E-08 | +----?+-  | Better signals    |
| rs35591604      | rs514192  | 8q22.3 | 8 | 102654032 | A   | G  | 0.0895 | 0.9 (0.86-0.94)  | 1.68E-05 | 6.01E-08 | +----?+-  | Better signals    |
| rs34302508      | rs514192  | 8q22.3 | 8 | 102654384 | C   | CT | 0.9106 | 1.12 (1.07-1.18) | 4.53E-06 | 4.12E-08 | +++++?++  | Better signals    |
| rs36094595      | rs514192  | 8q22.3 | 8 | 102654853 | T   | A  | 0.9105 | 1.11 (1.06-1.17) | 1.63E-05 | 5.94E-08 | +++++?++  | Better signals    |
| rs76192582      | rs1011970 | 9p21.3 | 9 | 21857469  | T   | C  | 0.9466 | 1.17 (1.1-1.24)  | 6.90E-07 | 5.34E-08 | +++++?+++ | Better signals    |
| rs118136736     | rs1011970 | 9p21.3 | 9 | 21857738  | T   | G  | 0.9467 | 1.17 (1.1-1.24)  | 7.71E-07 | 5.09E-08 | +++++?+++ | Better signals    |
| rs116877148     | rs1011970 | 9p21.3 | 9 | 21858276  | T   | C  | 0.9467 | 1.17 (1.1-1.24)  | 6.40E-07 | 4.28E-08 | +++++?+++ | Better signals    |
| rs117105750     | rs1011970 | 9p21.3 | 9 | 21858649  | A   | G  | 0.9466 | 1.17 (1.1-1.24)  | 5.30E-07 | 2.08E-07 | +++++?+++ | Better signals    |
| rs117659691     | rs1011970 | 9p21.3 | 9 | 21858829  | A   | G  | 0.0533 | 0.86 (0.81-0.91) | 5.28E-07 | 4.01E-08 | +----?--  | Better signals    |
| chr9:21859844:D | rs1011970 | 9p21.3 | 9 | 21859844  | G   | GA | 0.0576 | 0.86 (0.81-0.91) | 4.29E-07 | 3.51E-08 | +----?--  | Better signals    |
| rs113176322     | rs1011970 | 9p21.3 | 9 | 21860824  | C   | G  | 0.9457 | 1.17 (1.1-1.24)  | 5.01E-07 | 7.56E-09 | +++++?+++ | Better signals    |
| rs79054071      | rs1011970 | 9p21.3 | 9 | 21861411  | T   | G  | 0.9467 | 1.17 (1.1-1.24)  | 5.83E-07 | 4.60E-08 | +++++?+++ | Better signals    |
| rs78443963      | rs1011970 | 9p21.3 | 9 | 21861449  | C   | G  | 0.9478 | 1.17 (1.1-1.25)  | 2.92E-07 | 2.27E-08 | +++++?+++ | Better signals    |
| rs4129861       | rs1011970 | 9p21.3 | 9 | 21861552  | T   | C  | 0.053  | 0.85 (0.8-0.91)  | 3.84E-07 | 5.52E-09 | +----?--  | Better signals    |
| rs78195856      | rs1011970 | 9p21.3 | 9 | 21862272  | A   | C  | 0.0535 | 0.85 (0.8-0.91)  | 3.73E-07 | 3.73E-07 | +----?--  | Better signals    |
| rs78389853      | rs1011970 | 9p21.3 | 9 | 21862406  | C   | G  | 0.0523 | 0.85 (0.8-0.91)  | 3.38E-07 | 2.64E-08 | +----?--  | Better signals    |

|                 |           |        |   |          |     |    |        |                  |          |          |            |                |
|-----------------|-----------|--------|---|----------|-----|----|--------|------------------|----------|----------|------------|----------------|
| rs79546636      | rs1011970 | 9p21.3 | 9 | 21863656 | T   | G  | 0.0523 | 0.85 (0.8-0.91)  | 3.86E-07 | 3.02E-08 | -----?--   | Better signals |
| rs75991963      | rs1011970 | 9p21.3 | 9 | 21867244 | T   | C  | 0.0549 | 0.86 (0.81-0.92) | 1.14E-06 | 1.19E-08 | +-----?--  | Better signals |
| rs75797591      | rs1011970 | 9p21.3 | 9 | 21867321 | A   | G  | 0.0528 | 0.86 (0.81-0.91) | 5.54E-07 | 4.20E-08 | -----?--   | Better signals |
| rs79821126      | rs1011970 | 9p21.3 | 9 | 21869138 | T   | C  | 0.055  | 0.86 (0.81-0.92) | 1.28E-06 | 1.03E-07 | +-----?--  | Better signals |
| rs77068755      | rs1011970 | 9p21.3 | 9 | 21870206 | A   | G  | 0.0525 | 0.86 (0.81-0.91) | 8.03E-07 | 4.85E-08 | -----?--   | Better signals |
| rs73438594      | rs1011970 | 9p21.3 | 9 | 21870343 | C   | G  | 0.9462 | 1.17 (1.1-1.24)  | 5.76E-07 | 7.91E-09 | ++++++?+++ | Better signals |
| rs76597469      | rs1011970 | 9p21.3 | 9 | 21871151 | C   | G  | 0.9459 | 1.16 (1.09-1.23) | 1.05E-06 | 7.50E-08 | ++++++?+++ | Better signals |
| rs61431854      | rs1011970 | 9p21.3 | 9 | 21871169 | A   | T  | 0.0553 | 0.86 (0.81-0.91) | 6.33E-07 | 9.40E-09 | +-----?--  | Better signals |
| rs7032349       | rs1011970 | 9p21.3 | 9 | 21871638 | A   | G  | 0.9443 | 1.16 (1.1-1.23)  | 7.56E-07 | 1.04E-08 | ++++++?+++ | Better signals |
| rs73440407      | rs1011970 | 9p21.3 | 9 | 21871812 | T   | C  | 0.0558 | 0.86 (0.81-0.91) | 6.47E-07 | 1.07E-08 | +-----?--  | Better signals |
| rs79495898      | rs1011970 | 9p21.3 | 9 | 21872024 | T   | C  | 0.9459 | 1.16 (1.09-1.23) | 1.07E-06 | 7.65E-08 | ++++++?+++ | Better signals |
| rs10125945      | rs1011970 | 9p21.3 | 9 | 21872173 | A   | G  | 0.9435 | 1.16 (1.09-1.23) | 8.94E-07 | 6.71E-08 | ++++++?+++ | Better signals |
| rs79913997      | rs1011970 | 9p21.3 | 9 | 21872318 | A   | G  | 0.9459 | 1.16 (1.09-1.23) | 1.07E-06 | 7.73E-08 | ++++++?+++ | Better signals |
| rs76059716      | rs1011970 | 9p21.3 | 9 | 21872615 | T   | C  | 0.9459 | 1.16 (1.09-1.23) | 1.07E-06 | 7.63E-08 | ++++++?+++ | Better signals |
| rs73440418      | rs1011970 | 9p21.3 | 9 | 21873525 | A   | T  | 0.0548 | 0.86 (0.81-0.91) | 4.91E-07 | 9.93E-08 | +-----?--  | Better signals |
| 9:21873619:C:G  | rs1011970 | 9p21.3 | 9 | 21873619 | C   | G  | 0.9457 | 1.15 (1.09-1.23) | 5.46E-06 | 3.90E-07 | ++++++?+?  | Better signals |
| rs115417373     | rs1011970 | 9p21.3 | 9 | 21874626 | A   | G  | 0.0536 | 0.85 (0.8-0.91)  | 2.63E-07 | 9.83E-08 | -----?--   | Better signals |
| rs111740773     | rs1011970 | 9p21.3 | 9 | 21875578 | A   | G  | 0.055  | 0.86 (0.81-0.91) | 3.77E-07 | 2.75E-08 | -----?--   | Better signals |
| rs143447579     | rs1011970 | 9p21.3 | 9 | 21876086 | T   | C  | 0.054  | 0.86 (0.81-0.91) | 1.03E-06 | 7.23E-08 | +-----?--  | Better signals |
| 9:21876216:G:GT | rs1011970 | 9p21.3 | 9 | 21876216 | G   | GT | 0.9475 | 1.15 (1.08-1.23) | 1.21E-05 | 4.71E-07 | ++++++?+?  | Better signals |
| rs117168139     | rs1011970 | 9p21.3 | 9 | 21878945 | A   | G  | 0.0532 | 0.86 (0.81-0.91) | 4.89E-07 | 1.85E-08 | -----?--   | Better signals |
| rs7863919       | rs1011970 | 9p21.3 | 9 | 21879713 | T   | C  | 0.0539 | 0.85 (0.8-0.91)  | 2.35E-07 | 4.56E-08 | -----?--   | Better signals |
| rs149793082     | rs1011970 | 9p21.3 | 9 | 21879827 | A   | AT | 0.0538 | 0.86 (0.8-0.91)  | 2.14E-06 | 1.58E-07 | -----?+?   | Better signals |
| rs116907830     | rs1011970 | 9p21.3 | 9 | 21879921 | C   | G  | 0.9472 | 1.17 (1.1-1.24)  | 5.47E-07 | 3.73E-08 | ++++++?+++ | Better signals |
| rs73440434      | rs1011970 | 9p21.3 | 9 | 21880909 | T   | C  | 0.0539 | 0.85 (0.8-0.91)  | 2.24E-07 | 4.58E-08 | -----?--   | Better signals |
| rs73440436      | rs1011970 | 9p21.3 | 9 | 21880997 | A   | G  | 0.9461 | 1.17 (1.1-1.25)  | 2.24E-07 | 4.35E-08 | ++++++?+++ | Better signals |
| rs73440437      | rs1011970 | 9p21.3 | 9 | 21881946 | C   | G  | 0.0539 | 0.85 (0.8-0.91)  | 2.23E-07 | 4.39E-08 | -----?--   | Better signals |
| rs73440438      | rs1011970 | 9p21.3 | 9 | 21882594 | T   | G  | 0.054  | 0.85 (0.8-0.91)  | 2.23E-07 | 4.43E-08 | -----?--   | Better signals |
| chr9:21882631:D | rs1011970 | 9p21.3 | 9 | 21882631 | CTT | C  | 0.9459 | 1.17 (1.1-1.24)  | 1.34E-06 | 2.58E-07 | ++++++?+?  | Better signals |
| rs73440439      | rs1011970 | 9p21.3 | 9 | 21882710 | A   | C  | 0.0542 | 0.85 (0.8-0.91)  | 2.30E-07 | 4.58E-08 | -----?--   | Better signals |
| rs7858737       | rs1011970 | 9p21.3 | 9 | 21883859 | C   | G  | 0.9452 | 1.17 (1.1-1.24)  | 5.27E-07 | 1.37E-07 | ++++++?+++ | Better signals |
| rs7874275       | rs1011970 | 9p21.3 | 9 | 21883860 | T   | G  | 0.9452 | 1.17 (1.1-1.24)  | 5.23E-07 | 1.36E-07 | ++++++?+++ | Better signals |
| rs117509244     | rs1011970 | 9p21.3 | 9 | 21886501 | C   | G  | 0.0539 | 0.86 (0.81-0.92) | 1.15E-06 | 8.59E-08 | +-----?--  | Better signals |
| rs80329145      | rs1011970 | 9p21.3 | 9 | 21886894 | T   | C  | 0.0539 | 0.86 (0.81-0.92) | 1.19E-06 | 8.93E-08 | +-----?--  | Better signals |
| rs142442624     | rs1011970 | 9p21.3 | 9 | 21887738 | A   | G  | 0.0521 | 0.86 (0.81-0.91) | 8.90E-07 | 7.05E-08 | +-----?--  | Better signals |
| rs111644260     | rs1011970 | 9p21.3 | 9 | 21888361 | A   | G  | 0.9455 | 1.17 (1.1-1.24)  | 4.87E-07 | 2.95E-08 | ++++++?+++ | Better signals |
| rs79008931      | rs1011970 | 9p21.3 | 9 | 21889885 | A   | G  | 0.9461 | 1.16 (1.09-1.23) | 1.30E-06 | 9.99E-08 | ++++++?+++ | Better signals |
| rs73440457      | rs1011970 | 9p21.3 | 9 | 21890153 | A   | G  | 0.0537 | 0.86 (0.8-0.91)  | 6.83E-07 | 3.27E-08 | +-----?--  | Better signals |
| rs2518717       | rs1011970 | 9p21.3 | 9 | 21959751 | C   | T  | 0.6257 | 0.94 (0.91-0.96) | 1.40E-05 | 6.90E-13 | ++-----    | Better signals |
| rs2106115       | rs1011970 | 9p21.3 | 9 | 21959900 | T   | C  | 0.2162 | 1.09 (1.06-1.13) | 1.74E-07 | 6.58E-09 | ++++++?+++ | Better signals |
| rs2106116       | rs1011970 | 9p21.3 | 9 | 21959966 | T   | C  | 0.2164 | 1.09 (1.06-1.13) | 1.71E-07 | 6.53E-09 | ++++++?+++ | Better signals |
| rs2263146       | rs1011970 | 9p21.3 | 9 | 21963048 | T   | C  | 0.3748 | 1.07 (1.04-1.1)  | 7.34E-06 | 2.35E-13 | +-----?--  | Better signals |
| rs34011899      | rs1011970 | 9p21.3 | 9 | 21968712 | A   | C  | 0.1829 | 1.1 (1.06-1.14)  | 1.96E-07 | 1.96E-07 | ++++++?+++ | Better signals |
| rs3731245       | rs1011970 | 9p21.3 | 9 | 21972445 | T   | C  | 0.1833 | 1.1 (1.06-1.14)  | 1.68E-07 | 1.68E-07 | ++++++?+++ | Better signals |
| rs2811708       | rs1011970 | 9p21.3 | 9 | 21973422 | T   | G  | 0.2157 | 1.1 (1.06-1.13)  | 4.17E-08 | 4.17E-08 | ++++++?+++ | Better signals |
| rs36228836      | rs1011970 | 9p21.3 | 9 | 21975141 | A   | T  | 0.8166 | 0.91 (0.88-0.94) | 1.71E-07 | 1.71E-07 | -----?--   | Better signals |
| chr9:21975681:D | rs1011970 | 9p21.3 | 9 | 21975681 | CG  | C  | 0.8164 | 0.91 (0.88-0.94) | 1.88E-07 | 1.88E-07 | -----?--   | Better signals |
| rs36228502      | rs1011970 | 9p21.3 | 9 | 21975695 | A   | G  | 0.1836 | 1.1 (1.06-1.13)  | 1.88E-07 | 1.88E-07 | ++++++?+++ | Better signals |
| rs186966895     | rs1011970 | 9p21.3 | 9 | 21978085 | A   | G  | 0.1836 | 1.1 (1.06-1.13)  | 1.48E-07 | 1.48E-07 | ++++++?+++ | Better signals |
| rs191598357     | rs1011970 | 9p21.3 | 9 | 21978086 | A   | T  | 0.8164 | 0.91 (0.88-0.94) | 1.49E-07 | 1.49E-07 | -----?--   | Better signals |
| rs2518720       | rs1011970 | 9p21.3 | 9 | 21978979 | T   | C  | 0.3298 | 1.08 (1.05-1.11) | 4.11E-07 | 6.11E-13 | ++++++?+++ | Better signals |

|                 |           |        |   |          |    |     |        |                  |          |          |            |                |
|-----------------|-----------|--------|---|----------|----|-----|--------|------------------|----------|----------|------------|----------------|
| rs77238175      | rs1011970 | 9p21.3 | 9 | 21979042 | A  | C   | 0.8149 | 0.91 (0.88-0.95) | 2.27E-07 | 2.27E-07 | -----?     | Better signals |
| rs7874405       | rs1011970 | 9p21.3 | 9 | 21980944 | C  | T   | 0.4652 | 1.07 (1.04-1.11) | 1.49E-05 | 2.11E-02 | +++++++?-  | Better signals |
| rs35302371      | rs1011970 | 9p21.3 | 9 | 21982478 | A  | AT  | 0.1941 | 1.08 (1.05-1.12) | 6.86E-06 | 6.86E-06 | +++++++??  | Better signals |
| rs3731217       | rs1011970 | 9p21.3 | 9 | 21984661 | C  | A   | 0.8031 | 0.92 (0.89-0.95) | 3.21E-07 | 3.03E-16 | -+-----    | Better signals |
| rs2811710       | rs1011970 | 9p21.3 | 9 | 21991923 | T  | C   | 0.324  | 1.08 (1.05-1.11) | 5.24E-07 | 1.70E-12 | +++++++++  | Better signals |
| rs78545330      | rs1011970 | 9p21.3 | 9 | 21995941 | A  | T   | 0.2189 | 1.09 (1.06-1.13) | 2.07E-08 | 1.10E-02 | +++++++++  | Better signals |
| rs113646886     | rs1011970 | 9p21.3 | 9 | 21996645 | C  | CCT | 0.7812 | 0.92 (0.89-0.95) | 7.64E-07 | 4.05E-02 | -----?+    | Better signals |
| rs3218010       | rs1011970 | 9p21.3 | 9 | 21998733 | T  | C   | 0.8044 | 0.91 (0.88-0.94) | 7.89E-08 | 7.89E-08 | -+-----?   | Better signals |
| rs3218008       | rs1011970 | 9p21.3 | 9 | 21998891 | A  | AAC | 0.2195 | 1.09 (1.05-1.12) | 6.28E-07 | 4.15E-02 | +++++++?-  | Better signals |
| rs3218007       | rs1011970 | 9p21.3 | 9 | 21999800 | T  | C   | 0.2202 | 1.1 (1.06-1.13)  | 9.86E-09 | 9.00E-03 | +++++++++  | Better signals |
| rs3218005       | rs1011970 | 9p21.3 | 9 | 22000247 | C  | T   | 0.7798 | 0.91 (0.88-0.94) | 6.85E-09 | 8.25E-03 | -+-----+   | Better signals |
| rs3218002       | rs1011970 | 9p21.3 | 9 | 22000841 | A  | G   | 0.2199 | 1.1 (1.06-1.13)  | 7.91E-09 | 6.66E-03 | +++++++++  | Better signals |
| chr9:22002556:D | rs1011970 | 9p21.3 | 9 | 22002556 | T  | TG  | 0.1949 | 1.1 (1.06-1.13)  | 5.14E-08 | 5.14E-08 | +++++++++  | Better signals |
| rs974336        | rs1011970 | 9p21.3 | 9 | 22006348 | T  | C   | 0.2226 | 1.1 (1.06-1.13)  | 5.89E-09 | 6.74E-03 | +++++++++  | Better signals |
| rs2285327       | rs1011970 | 9p21.3 | 9 | 22007048 | T  | C   | 0.8024 | 0.91 (0.88-0.94) | 4.88E-08 | 4.88E-08 | -+-----?   | Better signals |
| chr9:22009623:I | rs1011970 | 9p21.3 | 9 | 22009623 | CA | C   | 0.1961 | 1.1 (1.06-1.13)  | 4.53E-08 | 4.53E-08 | +++++++++  | Better signals |
| rs3808845       | rs1011970 | 9p21.3 | 9 | 22010575 | A  | G   | 0.1959 | 1.1 (1.06-1.13)  | 5.04E-08 | 5.04E-08 | +++++++++  | Better signals |
| rs3808846       | rs1011970 | 9p21.3 | 9 | 22010946 | A  | G   | 0.1959 | 1.1 (1.06-1.13)  | 4.86E-08 | 4.86E-08 | +++++++++  | Better signals |
| rs545226        | rs1011970 | 9p21.3 | 9 | 22012422 | G  | A   | 0.4404 | 1.06 (1.03-1.09) | 4.47E-05 | 4.72E-14 | +++++++++  | Better signals |
| rs34662415      | rs1011970 | 9p21.3 | 9 | 22012620 | G  | GA  | 0.2682 | 1.08 (1.05-1.12) | 1.58E-06 | 5.05E-03 | +++++++++? | Better signals |
| chr9:22012789:D | rs1011970 | 9p21.3 | 9 | 22012789 | G  | GA  | 0.2214 | 1.1 (1.06-1.13)  | 7.21E-09 | 7.21E-09 | +++++++++  | Better signals |
| rs116876910     | rs1011970 | 9p21.3 | 9 | 22014411 | A  | G   | 0.196  | 1.1 (1.06-1.13)  | 4.39E-08 | 4.39E-08 | +++++++++  | Better signals |
| rs643319        | rs1011970 | 9p21.3 | 9 | 22017836 | A  | C   | 0.3501 | 1.06 (1.03-1.09) | 2.83E-05 | 1.05E-09 | +++++++++  | Better signals |
| rs149401414     | rs1011970 | 9p21.3 | 9 | 22018125 | C  | G   | 0.8031 | 0.91 (0.88-0.94) | 3.30E-08 | 3.30E-08 | -+-----?   | Better signals |
| rs138417214     | rs1011970 | 9p21.3 | 9 | 22018437 | A  | G   | 0.8029 | 0.91 (0.88-0.94) | 3.75E-08 | 3.75E-08 | -+-----?   | Better signals |
| rs76219447      | rs1011970 | 9p21.3 | 9 | 22018718 | C  | G   | 0.8031 | 0.91 (0.88-0.94) | 3.61E-08 | 3.61E-08 | -+-----?   | Better signals |
| rs490005        | rs1011970 | 9p21.3 | 9 | 22020493 | A  | G   | 0.3506 | 1.06 (1.03-1.09) | 4.03E-05 | 4.30E-09 | +++++++++  | Better signals |
| rs568447        | rs1011970 | 9p21.3 | 9 | 22021615 | G  | A   | 0.438  | 1.06 (1.03-1.09) | 4.98E-05 | 1.29E-14 | +++++++++  | Better signals |
| rs567453        | rs1011970 | 9p21.3 | 9 | 22021737 | C  | G   | 0.3506 | 1.06 (1.03-1.09) | 3.12E-05 | 1.46E-09 | +++++++++  | Better signals |
| rs117418282     | rs1011970 | 9p21.3 | 9 | 22022454 | T  | C   | 0.1965 | 1.1 (1.06-1.13)  | 2.63E-08 | 2.63E-08 | +++++++++  | Better signals |
| rs7039304       | rs1011970 | 9p21.3 | 9 | 22022786 | A  | T   | 0.1964 | 1.1 (1.06-1.13)  | 3.03E-08 | 3.03E-08 | +++++++++  | Better signals |
| rs76774391      | rs1011970 | 9p21.3 | 9 | 22023775 | C  | G   | 0.1967 | 1.1 (1.06-1.13)  | 2.66E-08 | 2.66E-08 | +++++++++  | Better signals |
| rs504318        | rs1011970 | 9p21.3 | 9 | 22024023 | T  | A   | 0.6494 | 0.94 (0.92-0.97) | 3.43E-05 | 1.01E-09 | -+-----    | Better signals |
| rs496892        | rs1011970 | 9p21.3 | 9 | 22024351 | T  | C   | 0.3497 | 1.06 (1.03-1.09) | 3.44E-05 | 6.73E-10 | +++++++++  | Better signals |
| rs76810097      | rs1011970 | 9p21.3 | 9 | 22027714 | T  | C   | 0.1959 | 1.1 (1.06-1.13)  | 2.83E-08 | 2.83E-08 | +++++++++  | Better signals |
| rs79666073      | rs1011970 | 9p21.3 | 9 | 22031440 | A  | G   | 0.1961 | 1.1 (1.06-1.13)  | 3.39E-08 | 3.39E-08 | +++++++++  | Better signals |
| rs77706751      | rs1011970 | 9p21.3 | 9 | 22031441 | T  | C   | 0.1961 | 1.1 (1.06-1.13)  | 3.39E-08 | 3.39E-08 | +++++++++  | Better signals |
| rs74599268      | rs1011970 | 9p21.3 | 9 | 22031778 | A  | T   | 0.8038 | 0.91 (0.88-0.94) | 3.10E-08 | 3.10E-08 | -+-----?   | Better signals |
| rs76521274      | rs1011970 | 9p21.3 | 9 | 22032793 | T  | C   | 0.8098 | 0.91 (0.88-0.94) | 2.60E-08 | 8.08E-07 | -+-----+   | Better signals |
| rs80248631      | rs1011970 | 9p21.3 | 9 | 22034109 | T  | C   | 0.1893 | 1.1 (1.06-1.14)  | 2.57E-08 | 2.57E-08 | +++++++++  | Better signals |
| rs77953206      | rs1011970 | 9p21.3 | 9 | 22038354 | A  | G   | 0.1857 | 1.1 (1.06-1.14)  | 2.06E-08 | 2.06E-08 | +++++++++  | Better signals |
| rs78777686      | rs1011970 | 9p21.3 | 9 | 22038615 | A  | G   | 0.1858 | 1.1 (1.06-1.14)  | 1.85E-08 | 1.85E-08 | +++++++++  | Better signals |
| rs117561861     | rs1011970 | 9p21.3 | 9 | 22040116 | C  | G   | 0.8141 | 0.91 (0.88-0.94) | 1.96E-08 | 1.96E-08 | -+-----?   | Better signals |
| rs75227345      | rs1011970 | 9p21.3 | 9 | 22042297 | T  | C   | 0.1863 | 1.1 (1.06-1.14)  | 1.61E-08 | 1.61E-08 | +++++++++  | Better signals |
| chr9:22042952:I | rs1011970 | 9p21.3 | 9 | 22042952 | T  | TA  | 0.8137 | 0.91 (0.88-0.94) | 1.64E-08 | 1.64E-08 | -+-----?   | Better signals |
| rs73652846      | rs1011970 | 9p21.3 | 9 | 22043260 | A  | G   | 0.1871 | 1.1 (1.06-1.14)  | 1.55E-08 | 4.17E-07 | +++++++++  | Better signals |
| rs77061973      | rs1011970 | 9p21.3 | 9 | 22045218 | C  | G   | 0.814  | 0.91 (0.88-0.94) | 2.53E-08 | 2.53E-08 | -+-----?   | Better signals |
| rs17834131      | rs1011970 | 9p21.3 | 9 | 22046168 | A  | G   | 0.1859 | 1.1 (1.06-1.14)  | 2.70E-08 | 2.70E-08 | +++++++++  | Better signals |
| rs76184305      | rs1011970 | 9p21.3 | 9 | 22046870 | T  | C   | 0.1858 | 1.1 (1.06-1.14)  | 2.95E-08 | 2.95E-08 | +++++++++  | Better signals |
| rs74400540      | rs1011970 | 9p21.3 | 9 | 22048342 | A  | G   | 0.1857 | 1.1 (1.06-1.14)  | 2.81E-08 | 2.81E-08 | +++++++++  | Better signals |
| rs77792598      | rs1011970 | 9p21.3 | 9 | 22051248 | C  | G   | 0.8143 | 0.91 (0.88-0.94) | 3.72E-08 | 3.72E-08 | -+-----?   | Better signals |

|                      |                                 |          |    |           |        |                 |        |                  |          |          |           |                   |
|----------------------|---------------------------------|----------|----|-----------|--------|-----------------|--------|------------------|----------|----------|-----------|-------------------|
| chr9:22051873:D      | rs1011970                       | 9p21.3   | 9  | 22051873  | T      | TA              | 0.1868 | 1.1 (1.06-1.14)  | 4.75E-08 | 4.75E-08 | +++++++?  | Better signals    |
| rs117761422          | rs1011970                       | 9p21.3   | 9  | 22059054  | T      | G               | 0.1849 | 1.1 (1.06-1.13)  | 1.04E-07 | 1.04E-07 | +++++++?  | Better signals    |
| rs117914182          | rs1011970                       | 9p21.3   | 9  | 22059382  | T      | C               | 0.1859 | 1.09 (1.06-1.13) | 1.24E-07 | 1.24E-07 | +++++++?  | Better signals    |
| rs150690757          | rs1011970                       | 9p21.3   | 9  | 22059623  | T      | C               | 0.1855 | 1.1 (1.06-1.13)  | 1.10E-07 | 1.10E-07 | +++++++?  | Better signals    |
| rs191148638          | rs1011970                       | 9p21.3   | 9  | 22063007  | T      | G               | 0.1703 | 1.1 (1.05-1.14)  | 9.30E-06 | 2.63E-09 | +++++++?  | Better signals    |
| rs75286189           | rs10822013,rs10995201           | 10q21.2  | 10 | 64265965  | C      | T               | 0.786  | 1.08 (1.04-1.12) | 1.28E-05 | 1.28E-06 | +++++?++  | Secondary signals |
| rs78993715           | rs10822013,rs10995201           | 10q21.2  | 10 | 64266932  | T      | C               | 0.2181 | 0.92 (0.89-0.96) | 1.09E-05 | 9.41E-07 | ++++-?--  | Secondary signals |
| rs77818958           | rs10822013,rs10995201           | 10q21.2  | 10 | 64269354  | A      | C               | 0.2193 | 0.93 (0.89-0.96) | 9.53E-06 | 7.73E-07 | ++++-?--  | Secondary signals |
| rs74232916           | rs10822013,rs10995201           | 10q21.2  | 10 | 64270218  | T      | G               | 0.2154 | 0.92 (0.89-0.96) | 7.99E-06 | 9.22E-07 | ++++-?--  | Secondary signals |
| rs16917327           | rs10822013,rs10995201           | 10q21.2  | 10 | 64272616  | A      | G               | 0.2208 | 0.93 (0.89-0.96) | 1.20E-05 | 7.51E-08 | ++++-?--  | Secondary signals |
| rs74205822           | rs10822013,rs10995201           | 10q21.2  | 10 | 64282162  | A      | C               | 0.212  | 0.92 (0.89-0.95) | 2.69E-06 | 1.57E-07 | ++++-?--  | Secondary signals |
| rs77044930           | rs10822013,rs10995201           | 10q21.2  | 10 | 64287935  | A      | G               | 0.2162 | 0.92 (0.89-0.95) | 2.22E-06 | 1.30E-07 | ++++-?--  | Secondary signals |
| rs12241616           | rs10822013,rs10995201           | 10q21.2  | 10 | 64292879  | T      | C               | 0.2137 | 0.92 (0.89-0.95) | 3.21E-06 | 1.50E-07 | ++++-?--  | Secondary signals |
| rs78481535           | rs10822013,rs10995201           | 10q21.2  | 10 | 64293803  | C      | T               | 0.7862 | 1.09 (1.05-1.12) | 3.32E-06 | 1.54E-07 | +++++?+++ | Secondary signals |
| rs78843249           | rs10822013,rs10995201           | 10q21.2  | 10 | 64297094  | G      | A               | 0.782  | 1.08 (1.05-1.12) | 4.39E-06 | 2.71E-07 | +++++?+++ | Secondary signals |
| rs11812956           | rs10822013,rs10995201           | 10q21.2  | 10 | 64299457  | C      | G               | 0.2175 | 0.92 (0.89-0.95) | 3.44E-06 | 1.78E-07 | ++++-?--  | Secondary signals |
| rs77925805           | rs10822013,rs10995201           | 10q21.2  | 10 | 64300005  | T      | A               | 0.7826 | 1.08 (1.05-1.12) | 4.54E-06 | 2.42E-07 | +++++?+++ | Secondary signals |
| rs79297937           | rs10822013,rs10995201           | 10q21.2  | 10 | 64300024  | A      | C               | 0.2176 | 0.92 (0.89-0.96) | 5.36E-06 | 2.81E-07 | ++++-?--  | Secondary signals |
| rs78053936           | rs10822013,rs10995201           | 10q21.2  | 10 | 64300331  | C      | A               | 0.8022 | 1.11 (1.07-1.15) | 1.74E-08 | 2.74E-09 | +++++?+++ | Secondary signals |
| rs10762849           | rs704010                        | 10q22.3  | 10 | 80886061  | T      | C               | 0.4372 | 1.07 (1.04-1.10) | 2.39E-06 | 2.37E-28 | +++++?+++ | Better signals    |
| rs10762850           | rs704010                        | 10q22.3  | 10 | 80886337  | G      | T               | 0.5588 | 0.93 (0.91-0.96) | 2.62E-06 | 7.67E-28 | ++++-?--  | Better signals    |
| rs10824721           | rs704010                        | 10q22.3  | 10 | 80886599  | C      | G               | 0.4477 | 1.07 (1.04-1.10) | 2.35E-06 | 3.99E-28 | +++++?+++ | Better signals    |
| rs4980029            | rs704010                        | 10q22.3  | 10 | 80886726  | G      | A               | 0.5231 | 0.94 (0.91-0.96) | 5.43E-06 | 5.54E-28 | ++++-?--  | Better signals    |
| rs4980030            | rs704010                        | 10q22.3  | 10 | 80886835  | C      | T               | 0.5796 | 0.93 (0.91-0.96) | 2.75E-06 | 4.80E-26 | ++++-?--  | Better signals    |
| rs7903793            | rs704010                        | 10q22.3  | 10 | 80887212  | T      | C               | 0.4178 | 1.07 (1.04-1.10) | 1.94E-06 | 1.32E-25 | +++++?+++ | Better signals    |
| rs7904249            | rs704010                        | 10q22.3  | 10 | 80887337  | A      | G               | 0.4177 | 1.07 (1.04-1.10) | 1.30E-06 | 7.72E-26 | +++++?+++ | Better signals    |
| rs11269768           | rs704010                        | 10q22.3  | 10 | 80887430  | G      | GGCCCTGCTCA     | 0.413  | 1.07 (1.03-1.10) | 4.34E-05 | 5.60E-25 | +++++???  | Secondary signals |
| rs7921002            | rs704010                        | 10q22.3  | 10 | 80887721  | G      | T               | 0.5561 | 0.93 (0.91-0.96) | 1.65E-06 | 1.14E-25 | ++++-?--  | Better signals    |
| rs10762851           | rs704010                        | 10q22.3  | 10 | 80887957  | G      | A               | 0.556  | 0.93 (0.91-0.96) | 2.33E-06 | 9.54E-26 | ++++-?--  | Better signals    |
| 10:80888588:A:AAAAAG | rs704010                        | 10q22.3  | 10 | 80888588  | AAAAAG | A               | 0.5597 | 0.94 (0.91-0.97) | 2.79E-05 | 1.45E-25 | ++++-???  | Secondary signals |
| rs7097066            | rs704010                        | 10q22.3  | 10 | 80888858  | A      | G               | 0.4437 | 1.07 (1.04-1.10) | 7.92E-07 | 2.42E-26 | +++++?+++ | Better signals    |
| rs75167266           | rs704010                        | 10q22.3  | 10 | 80889177  | T      | C               | 0.416  | 1.08 (1.05-1.11) | 4.70E-07 | 7.59E-26 | +++++?+++ | Better signals    |
| rs74385409           | rs704010                        | 10q22.3  | 10 | 80889211  | T      | G               | 0.4148 | 1.07 (1.04-1.11) | 6.80E-07 | 5.37E-26 | +++++?+++ | Better signals    |
| rs72816252           | rs704010                        | 10q22.3  | 10 | 80889806  | G      | A               | 0.5813 | 0.93 (0.90-0.96) | 6.94E-07 | 5.09E-26 | ++++-?--  | Better signals    |
| rs4979844            | rs704010                        | 10q22.3  | 10 | 80890671  | A      | T               | 0.402  | 1.08 (1.05-1.11) | 5.09E-07 | 3.67E-26 | +++++?+++ | Better signals    |
| rs4979845            | rs704010                        | 10q22.3  | 10 | 80890674  | C      | T               | 0.599  | 0.93 (0.90-0.96) | 6.01E-07 | 1.84E-26 | ++++-?--  | Better signals    |
| rs4980031            | rs704010                        | 10q22.3  | 10 | 80891631  | T      | C               | 0.3982 | 1.07 (1.04-1.11) | 9.27E-07 | 6.83E-26 | +++++?+++ | Better signals    |
| rs1338427            | rs7904519                       | 10q25.2  | 10 | 115126117 | A      | C               | 0.7564 | 1.08 (1.04-1.12) | 1.24E-05 | 6.09E-18 | ++?++++?  | Better signals    |
| rs10885438           | rs7904519                       | 10q25.2  | 10 | 115126868 | G      | A               | 0.2439 | 0.93 (0.90-0.96) | 7.68E-06 | 2.74E-18 | ++-?----? | Better signals    |
| rs112400465          | rs7904519                       | 10q25.2  | 10 | 115127454 | CAA    | C               | 0.2015 | 0.93 (0.9-0.96)  | 8.93E-05 | 8.93E-05 | +-?----?? | Better signals    |
| rs12250948           | rs7904519                       | 10q25.2  | 10 | 115128491 | T      | C               | 0.731  | 1.08 (1.05-1.12) | 2.34E-06 | 9.81E-20 | ++?++++?  | Better signals    |
| rs10579013           | rs7904519                       | 10q25.2  | 10 | 115131314 | CAT    | C               | 0.7907 | 1.08 (1.04-1.12) | 4.22E-05 | 3.12E-11 | ++?++++?  | Better signals    |
| rs11196311           | rs7904519                       | 10q25.2  | 10 | 115132212 | G      | T               | 0.2093 | 0.93 (0.90-0.96) | 4.43E-05 | 1.11E-11 | +-?----?  | Better signals    |
| rs10787484           | rs7904519                       | 10q25.2  | 10 | 115137668 | A      | G               | 0.7889 | 1.08 (1.04-1.12) | 3.97E-05 | 1.17E-11 | ++?++++?  | Better signals    |
| rs10886955           | rs11199914,rs2981578,rs45631563 | 10q26.13 | 10 | 123370354 | A      | A               | 0.2629 | 1.07 (1.04-1.11) | 7.87E-05 | 4.24E-04 | +++++?++  | Secondary signals |
| rs4980395            | rs3817198                       | 11p15.5  | 11 | 1876594   | T      | C               | 0.0886 | 1.16 (1.09-1.23) | 4.20E-07 | 1.81E-05 | +++++?+++ | Better signals    |
| rs72843933           | rs3817198                       | 11p15.5  | 11 | 1878406   | T      | C               | 0.172  | 1.10 (1.06-1.14) | 2.96E-06 | 3.54E-05 | +++++?+++ | Better signals    |
| rs57775872           | rs3817198                       | 11p15.5  | 11 | 1882079   | T      | ATGGGTGGATGAGTC | 0.5461 | 0.91 (0.88-0.95) | 9.29E-07 | 9.29E-07 | -----???  | Better signals    |
| rs72843938           | rs3817198                       | 11p15.5  | 11 | 1884353   | A      | G               | 0.0912 | 1.16 (1.10-1.23) | 8.86E-08 | 1.99E-07 | +++++?+++ | Better signals    |
| rs1810199            | rs3817198                       | 11p15.5  | 11 | 1886306   | T      | C               | 0.2949 | 1.07 (1.03-1.10) | 4.94E-05 | 7.57E-16 | +++++?+++ | Better signals    |
| rs61868778           | rs3817198                       | 11p15.5  | 11 | 1891319   | T      | C               | 0.0946 | 1.13 (1.07-1.20) | 2.28E-05 | 4.70E-14 | +++++?+++ | Better signals    |

|                    |                    |          |    |           |       |     |        |                  |          |          |          |                   |
|--------------------|--------------------|----------|----|-----------|-------|-----|--------|------------------|----------|----------|----------|-------------------|
| rs111528762        | rs3817198          | 11p15.5  | 11 | 1893624   | T     | C   | 0.0968 | 1.13 (1.07-1.19) | 2.39E-05 | 1.53E-14 | ++++++++ | Better signals    |
| rs1985624          | rs3817198          | 11p15.5  | 11 | 1896777   | C     | T   | 0.9033 | 0.89 (0.84-0.94) | 5.17E-05 | 8.96E-15 | +-----   | Better signals    |
| rs621679           | rs3817198          | 11p15.5  | 11 | 1902768   | A     | G   | 0.497  | 1.06 (1.03-1.09) | 5.82E-05 | 5.41E-13 | +-----   | Better signals    |
| rs661348           | rs3817198          | 11p15.5  | 11 | 1905292   | C     | T   | 0.5009 | 0.94 (0.91-0.97) | 2.84E-05 | 2.52E-07 | +-----   | Better signals    |
| rs3781962          | rs3817198          | 11p15.5  | 11 | 1907609   | G     | C   | 0.5004 | 0.94 (0.91-0.97) | 5.61E-05 | 1.42E-09 | +-----   | Better signals    |
| rs3781956          | rs3817198          | 11p15.5  | 11 | 1945884   | A     | G   | 0.5046 | 1.06 (1.03-1.10) | 6.76E-05 | 1.98E-09 | +-----   | Better signals    |
| rs540710           | rs3817198          | 11p15.5  | 11 | 1947575   | A     | C   | 0.5006 | 1.06 (1.03-1.09) | 9.92E-05 | 2.80E-10 | +-----   | Better signals    |
| rs10894076         | rs11820646         | 11q24.3  | 11 | 129463060 | C     | T   | 0.405  | 1.07 (1.03-1.10) | 4.71E-05 | 4.71E-05 | +-----   | Better signals    |
| rs12285545         | rs11820646         | 11q24.3  | 11 | 129464443 | A     | G   | 0.5968 | 0.94 (0.91-0.97) | 3.70E-05 | 1.64E-01 | +-----   | Better signals    |
| rs10791028         | rs11820646         | 11q24.3  | 11 | 129467292 | T     | C   | 0.3908 | 1.07 (1.03-1.10) | 3.20E-05 | 4.19E-02 | +-----   | Better signals    |
| rs11067617         | rs1292011          | 12q24.21 | 12 | 115926630 | A     | G   | 0.4496 | 1.06 (1.03-1.09) | 5.18E-05 | 3.75E-07 | +-----   | Secondary signals |
| rs9788133          | rs1292011          | 12q24.21 | 12 | 115979953 | A     | G   | 0.1685 | 1.08 (1.04-1.12) | 4.27E-05 | 2.41E-10 | +-----   | Secondary signals |
| rs2434079          | rs1292011          | 12q24.21 | 12 | 115989277 | C     | T   | 0.8333 | 0.92 (0.89-0.96) | 4.46E-05 | 5.16E-10 | +-----   | Secondary signals |
| rs61929345         | rs1292011          | 12q24.21 | 12 | 116001403 | T     | G   | 0.1608 | 1.11 (1.07-1.15) | 4.90E-08 | 2.87E-04 | +-----   | Secondary signals |
| rs11067657         | rs1292011          | 12q24.21 | 12 | 116002390 | G     | T   | 0.8334 | 0.91 (0.88-0.94) | 2.26E-07 | 1.17E-03 | +-----   | Secondary signals |
| rs75041341         | rs1292011          | 12q24.21 | 12 | 116007174 | G     | T   | 0.8347 | 0.91 (0.88-0.94) | 4.00E-07 | 1.27E-03 | +-----   | Secondary signals |
| rs75525437         | rs1292011          | 12q24.21 | 12 | 116007358 | A     | A   | 0.1564 | 1.10 (1.06-1.15) | 2.37E-07 | 5.78E-04 | +-----   | Secondary signals |
| rs115377147        | rs1292011          | 12q24.21 | 12 | 116008014 | C     | G   | 0.8374 | 0.91 (0.87-0.94) | 1.94E-07 | 7.26E-04 | +-----   | Secondary signals |
| rs181046969        | rs1292011          | 12q24.21 | 12 | 116008018 | A     | C   | 0.1584 | 1.10 (1.06-1.15) | 2.17E-07 | 7.48E-04 | +-----   | Secondary signals |
| rs35327801         | rs4784227          | 16q12.1  | 16 | 52545751  | GA    | G   | 0.828  | 1.08 (1.04-1.12) | 7.98E-05 | 4.05E-03 | +-----   | Secondary signals |
| rs7193453          | rs4784227          | 16q12.1  | 16 | 52565150  | T     | C   | 0.5055 | 1.07 (1.04-1.10) | 1.31E-05 | 4.58E-05 | +-----   | Secondary signals |
| rs9926163          | rs4784227          | 16q12.1  | 16 | 52565641  | T     | G   | 0.5051 | 1.07 (1.04-1.10) | 1.30E-05 | 4.60E-05 | +-----   | Secondary signals |
| rs4783780          | rs4784227          | 16q12.1  | 16 | 52571436  | C     | A   | 0.4784 | 0.93 (0.90-0.96) | 1.06E-06 | 2.37E-05 | +-----   | Secondary signals |
| rs9931232          | rs4784227          | 16q12.1  | 16 | 52572832  | A     | G   | 0.527  | 1.08 (1.04-1.11) | 1.44E-06 | 2.69E-05 | +-----   | Secondary signals |
| rs8052175          | rs4784227          | 16q12.1  | 16 | 52577142  | T     | C   | 0.5225 | 1.07 (1.04-1.11) | 2.12E-06 | 5.91E-06 | +-----   | Secondary signals |
| rs1123428          | rs4784227          | 16q12.1  | 16 | 52577835  | A     | T   | 0.5227 | 1.07 (1.04-1.11) | 2.20E-06 | 6.54E-06 | +-----   | Secondary signals |
| rs1420535          | rs4784227          | 16q12.1  | 16 | 52578215  | A     | C   | 0.5224 | 1.07 (1.04-1.11) | 2.14E-06 | 6.47E-06 | +-----   | Secondary signals |
| rs1477074          | rs4784227          | 16q12.1  | 16 | 52578548  | C     | T   | 0.4773 | 0.93 (0.90-0.96) | 2.20E-06 | 5.51E-06 | +-----   | Secondary signals |
| rs8044585          | rs4784227          | 16q12.1  | 16 | 52579906  | A     | C   | 0.5198 | 1.07 (1.04-1.11) | 2.90E-06 | 2.12E-05 | +-----   | Secondary signals |
| rs4784224          | rs4784227          | 16q12.1  | 16 | 52580247  | A     | C   | 0.5222 | 1.07 (1.04-1.10) | 9.30E-06 | 3.32E-05 | +-----   | Secondary signals |
| 16:52582774:TAA:TA | rs4784227          | 16q12.1  | 16 | 52582774  | TA    | TAA | 0.4692 | 0.93 (0.9-0.96)  | 3.30E-05 | 3.30E-05 | +-----   | Secondary signals |
| rs3803662          | rs4784227          | 16q12.1  | 16 | 52586341  | A     | G   | 0.6279 | 1.08 (1.05-1.12) | 4.13E-08 | 9.80E-14 | +-----   | Secondary signals |
| rs3803661          | rs4784227          | 16q12.1  | 16 | 52586477  | A     | G   | 0.6278 | 1.08 (1.05-1.12) | 3.69E-08 | 4.98E-14 | +-----   | Secondary signals |
| rs1109951          | rs4784227          | 16q12.1  | 16 | 52612044  | T     | C   | 0.1684 | 0.93 (0.89-0.96) | 9.40E-05 | 3.68E-03 | +-----   | Secondary signals |
| rs57277860         | rs527616,rs1436904 | 18q11.2  | 18 | 24531525  | G     | GTT | 0.3823 | 1.07 (1.04-1.11) | 1.34E-06 | 1.34E-06 | +-----   | Better signals    |
| rs1551821          | rs6507583          | 18q12.3  | 18 | 42866470  | C     | A   | 0.7388 | 1.08 (1.04-1.11) | 3.60E-06 | 1.30E-07 | +-----   | Better signals    |
| rs11662289         | rs6507583          | 18q12.3  | 18 | 42868375  | G     | A   | 0.7105 | 1.07 (1.04-1.11) | 2.34E-06 | 3.69E-08 | +-----   | Better signals    |
| rs11659252         | rs6507583          | 18q12.3  | 18 | 42877575  | G     | A   | 0.7398 | 1.08 (1.05-1.12) | 1.80E-07 | 2.66E-15 | +-----   | Better signals    |
| rs35451159         | rs6507583          | 18q12.3  | 18 | 42877630  | GA    | G   | 0.7412 | 1.08 (1.04-1.11) | 4.14E-06 | 1.31E-14 | +-----   | Better signals    |
| rs7233577          | rs6507583          | 18q12.3  | 18 | 42878504  | C     | T   | 0.7371 | 1.08 (1.05-1.12) | 4.13E-07 | 4.30E-15 | +-----   | Better signals    |
| rs8093563          | rs6507583          | 18q12.3  | 18 | 42879717  | A     | G   | 0.1473 | 0.9 (0.87-0.94)  | 2.27E-07 | 2.65E-12 | +-----   | Better signals    |
| rs12456097         | rs6507583          | 18q12.3  | 18 | 42880242  | G     | A   | 0.7114 | 1.09 (1.06-1.12) | 3.10E-08 | 3.22E-17 | +-----   | Better signals    |
| rs112901920        | rs6507583          | 18q12.3  | 18 | 42880349  | CTCTG | C   | 0.2603 | 0.93 (0.9-0.96)  | 3.30E-05 | 7.73E-14 | +-----   | Better signals    |
| rs9963678          | rs6507583          | 18q12.3  | 18 | 42881314  | T     | C   | 0.1707 | 0.91 (0.88-0.94) | 4.66E-07 | 9.32E-13 | +-----   | Better signals    |
| rs12455117         | rs6507583          | 18q12.3  | 18 | 42884026  | T     | A   | 0.6845 | 1.09 (1.06-1.12) | 1.71E-08 | 3.16E-17 | +-----   | Better signals    |
| rs36043071         | rs6507583          | 18q12.3  | 18 | 42888149  | C     | T   | 0.7467 | 1.06 (1.03-1.1)  | 8.42E-05 | 2.13E-07 | +-----   | Better signals    |
| rs9952980          | rs6507583          | 18q12.3  | 18 | 42888797  | C     | T   | 0.6649 | 1.08 (1.05-1.11) | 2.66E-07 | 1.22E-17 | +-----   | Better signals    |
| rs11082442         | rs6507583          | 18q12.3  | 18 | 42889017  | G     | C   | 0.6708 | 1.07 (1.04-1.11) | 8.04E-07 | 1.36E-15 | +-----   | Better signals    |
| rs12458939         | rs6507583          | 18q12.3  | 18 | 42889835  | A     | G   | 0.2533 | 0.94 (0.91-0.97) | 6.33E-05 | 1.09E-07 | +-----   | Better signals    |
| rs12954053         | rs6507583          | 18q12.3  | 18 | 42891853  | A     | G   | 0.227  | 0.93 (0.9-0.96)  | 3.74E-06 | 5.54E-08 | +-----   | Better signals    |
| rs16978341         | rs6507583          | 18q12.3  | 18 | 42891918  | C     | A   | 0.7725 | 1.08 (1.05-1.12) | 3.68E-06 | 5.51E-08 | +-----   | Better signals    |



|            |           |         |    |          |   |    |        |                  |          |          |            |                |
|------------|-----------|---------|----|----------|---|----|--------|------------------|----------|----------|------------|----------------|
| rs8086981  | rs6507583 | 18q12.3 | 18 | 42892099 | T | C  | 0.2269 | 0.93 (0.9-0.96)  | 3.42E-06 | 5.59E-08 | -----?---  | Better signals |
| rs8086861  | rs6507583 | 18q12.3 | 18 | 42892127 | G | A  | 0.7733 | 1.08 (1.04-1.12) | 3.93E-06 | 6.52E-08 | ++++++?+++ | Better signals |
| rs11314315 | rs6507583 | 18q12.3 | 18 | 42892348 | G | GA | 0.2458 | 0.93 (0.9-0.96)  | 1.22E-05 | 2.58E-08 | -----?--   | Better signals |
| rs2823095  | rs2823093 | 21q21.1 | 21 | 16521269 | A | G  | 0.2141 | 0.91 (0.88-0.94) | 2.57E-08 | 7.30E-08 | -----?---  | Better signals |
| rs2823120  | rs2823093 | 21q21.1 | 21 | 16547722 | A | G  | 0.1927 | 0.92 (0.89-0.95) | 2.49E-06 | 5.88E-08 | -----?---  | Better signals |
| rs7275186  | rs2823093 | 21q21.1 | 21 | 16560348 | C | T  | 0.6553 | 1.09 (1.06-1.12) | 2.81E-09 | 5.13E-04 | +++++++    | Better signals |
| rs2823126  | rs2823093 | 21q21.1 | 21 | 16561704 | A | G  | 0.2805 | 0.9 (0.88-0.93)  | 1.10E-10 | 1.17E-10 | -----?---  | Better signals |
| rs73894936 | rs2823093 | 21q21.1 | 21 | 16576566 | A | G  | 0.3444 | 0.93 (0.9-0.95)  | 1.95E-07 | 7.63E-04 | -----?---  | Better signals |
| rs2823148  | rs2823093 | 21q21.1 | 21 | 16584992 | A | G  | 0.4099 | 1.06 (1.03-1.09) | 6.17E-05 | 4.54E-04 | +++++++    | Better signals |
| rs2823149  | rs2823093 | 21q21.1 | 21 | 16585201 | T | C  | 0.4086 | 1.06 (1.03-1.09) | 6.04E-05 | 4.49E-04 | +++++++    | Better signals |

Secondary signals: SNPs had  $P < 0.0001$  in the conditional analysis but the magnitude was not 10 times smaller than all of the previously reported risk SNPs nearby.

Better signals: SNPs had  $P < 0.0001$  in the conditional analysis and the magnitude was 10 times smaller than any of the previously reported risk SNPs nearby.
