# Supplementary material for: Identification of novel breast cancer susceptibility loci in meta-analyses conducted among Asian and European descendants
Source: Nat Commun. 2020 Mar 5;11:1217. doi: 10.1038/s41467-020-15046-w (PMC7057957; doi:10.1038/s41467-020-15046-w)
Supplement: Supplementary file 6 — Supplementary Data 3 [file 41467_2020_15046_MOESM6_ESM.pdf]

Supplementary Data 3. Regulatory functional annotation of SNPs in high LD ( $r^2 > 0.8$ ) with newly associated SNPs in Asian populations using HaploReg

| SNP       | Chr | BP      | LD $r^2$ | Ref   | Alt | AFR  | AMR  | ASR  | EUR  | CEU  | POP | Primer | Primer (ENCODE) | Enhancer (ENCODE) | Enhancer (Roadmap) | Disease | Gene | Gene functional annotation |
|-----------|-----|---------|----------|-------|-----|------|------|------|------|------|-----|--------|-----------------|-------------------|--------------------|---------|------|----------------------------|
| c796460   | 1   | 1777293 | 0.81     | T     | A   | 0.22 | 0.28 | 0.39 | 0.25 | 0    | 0   |        |                 |                   |                    |         |      |                            |
| c11631670 | 1   | 1777212 | 0.88     | A     | T   | 0.22 | 0.28 | 0.39 | 0.25 | 0    | 0   |        |                 |                   |                    |         |      |                            |
| c796256   | 1   | 1802386 | 0.86     | A     | T   | 0.21 | 0.22 | 0.29 | 0.15 | 0    | 0   |        |                 |                   |                    |         |      |                            |
| c1121137  | 1   | 1803302 | 0.82     | 0.96  | T   | A    | 0.21 | 0.27 | 0.29 | 0.21 | 0   | 0      |                 |                   |                    |         |      |                            |
| c1207723  | 1   | 1803205 | 0.82     | 0.96  | G   | A    | 0.23 | 0.27 | 0.29 | 0.21 | 0   | 0      |                 |                   |                    |         |      |                            |
| c1121139  | 1   | 1803751 | 0.82     | 0.96  | G   | A    | 0.23 | 0.27 | 0.29 | 0.21 | 0   | 0      |                 |                   |                    |         |      |                            |
| c1364551  | 1   | 1802408 | 0.82     | 0.96  | G   | A    | 0.22 | 0.27 | 0.29 | 0.21 | 0   | 0      |                 |                   |                    |         |      |                            |
| c66720    | 1   | 1802702 | 0.82     | 0.99  | T   | A    | 0.22 | 0.27 | 0.29 | 0.21 | 0   | 0      |                 |                   |                    |         |      |                            |
| c1206903  | 1   | 1802556 | 0.83     | 0.96  | A   | C    | 0.24 | 0.27 | 0.29 | 0.21 | 0   | 0      |                 |                   |                    |         |      |                            |
| c12081    | 1   | 1802755 | 0.83     | 0.95  | T   | A    | 0.24 | 0.27 | 0.29 | 0.21 | 0   | 0      |                 |                   |                    |         |      |                            |
| c11495    | 1   | 1803060 | 0.86     | -0.95 | T   | C    | 0.27 | 0.37 | 0.45 | 0.3  | 0   | 0      |                 |                   |                    |         |      |                            |
| c99960    | 1   | 1803077 | 0.86     | -0.95 | T   | C    | 0.27 | 0.37 | 0.45 | 0.3  | 0   | 0      |                 |                   |                    |         |      |                            |
| c104066   | 1   | 1804180 | 0.86     | -0.95 | T   | C    | 0.27 | 0.37 | 0.45 | 0.3  | 0   | 0      |                 |                   |                    |         |      |                            |
| c104213   | 1   | 1804252 | 0.86     | -0.95 | T   | C    | 0.27 | 0.37 | 0.45 | 0.3  | 0   | 0      |                 |                   |                    |         |      |                            |
| c178439   | 1   | 1804349 | 0.86     | -0.95 | T   | C    | 0.27 | 0.37 | 0.45 | 0.3  | 0   | 0      |                 |                   |                    |         |      |                            |
| c427304   | 1   | 1816789 | 0.84     | 0.92  | A   | G    | 0.71 | 0.82 | 0.15 | 0.36 | 0   | 0      |                 |                   |                    |         |      |                            |
| c1187060  | 1   | 1816903 | 0.84     | 0.92  | G   | C    | 0.67 | 0.82 | 0.15 | 0.36 | 0   | 0      |                 |                   |                    |         |      |                            |
| c738615   | 1   | 1816540 | 0.84     | 0.94  | T   | C    | 0.7  | 0.82 | 0.15 | 0.35 | 0   | 0      |                 |                   |                    |         |      |                            |
| c284264   | 1   | 1816217 | 0.87     | 0.94  | A   | G    | 0.67 | 0.82 | 0.15 | 0.35 | 0   | 0      |                 |                   |                    |         |      |                            |
| c284265   | 1   | 1816202 | 0.86     | 0.94  | A   | G    | 0.68 | 0.82 | 0.15 | 0.35 | 0   | 0      |                 |                   |                    |         |      |                            |
| c273846   | 1   | 1816038 | 0.87     | 0.94  | T   | C    | 0.67 | 0.82 | 0.15 | 0.35 | 0   | 0      |                 |                   |                    |         |      |                            |
| c284269   | 1   | 1816096 | 0.87     | 0.94  | G   | C    | 0.68 | 0.83 | 0.15 | 0.35 | 0   | 0      |                 |                   |                    |         |      |                            |
| c273848   | 1   | 1816082 | 0.87     | 0.94  | T   | C    | 0.64 | 0.81 | 0.15 | 0.35 | 0   | 0      |                 |                   |                    |         |      |                            |
| c273849   | 1   | 1816259 | 0.87     | 0.94  | G   | C    | 0.67 | 0.82 | 0.15 | 0.35 | 0   | 0      |                 |                   |                    |         |      |                            |
| c540183   | 1   | 1816085 | 0.87     | 0.94  | C   | G    | 0.19 | 0.28 | 0.15 | 0.35 | 0   | 0      |                 |                   |                    |         |      |                            |
| c300700   | 1   | 1816290 | 0.87     | 0.94  | T   | G    | 0.67 | 0.82 | 0.15 | 0.35 | 0   | 0      |                 |                   |                    |         |      |                            |
| c284615   | 1   | 1816517 | 0.87     | 0.94  | C   | G    | 0.67 | 0.82 | 0.15 | 0.35 | 1   | 1      |                 |                   |                    |         |      |                            |
| c284382   | 1   | 1816542 | 0.87     | 0.94  | T   | G    | 0.67 | 0.82 | 0.15 | 0.35 | 0   | 0      |                 |                   |                    |         |      |                            |
| c284267   | 1   | 1816508 | 0.86     | 0.96  | C   | T    | 0.68 | 0.82 | 0.15 | 0.36 | 0   | 0      |                 |                   |                    |         |      |                            |
| c273849   | 1   | 1816096 | 0.87     | 0.94  | G   | C    | 0.68 | 0.83 | 0.15 | 0.35 | 0   | 0      |                 |                   |                    |         |      |                            |
| c273848   | 1   | 1816082 | 0.87     | 0.94  | T   | C    | 0.64 | 0.81 | 0.15 | 0.35 | 0   | 0      |                 |                   |                    |         |      |                            |
| c273849   | 1   | 1816259 | 0.87     | 0.94  | G   | C    | 0.67 | 0.82 | 0.15 | 0.35 | 0   | 0      |                 |                   |                    |         |      |                            |
| c273849   | 1   | 1816259 | 0.87     | 0.94  | G   | C    | 0.67 | 0.82 | 0.15 | 0.35 | 0   | 0      |                 |                   |                    |         |      |                            |
| c300700   | 1   | 1816290 | 0.87     | 0.94  | T   | G    | 0.67 | 0.82 | 0.15 | 0.35 | 0   | 0      |                 |                   |                    |         |      |                            |
| c284615   | 1   | 1816517 | 0.87     | 0.94  | C   | G    | 0.67 | 0.82 | 0.15 | 0.35 | 1   | 1      |                 |                   |                    |         |      |                            |
| c284382   | 1   | 1816542 | 0.87     | 0.94  | T   | G    | 0.67 | 0.82 | 0.15 | 0.35 | 0   | 0      |                 |                   |                    |         |      |                            |
| c284267   | 1   | 1816508 | 0.86     | 0.96  | C   | T    | 0.68 | 0.82 | 0.15 | 0.36 | 0   | 0      |                 |                   |                    |         |      |                            |
| c273849   | 1   | 1816096 | 0.87     | 0.94  | G   | C    | 0.68 | 0.83 | 0.15 | 0.35 | 0   | 0      |                 |                   |                    |         |      |                            |
| c273848   | 1   | 1816082 | 0.87     | 0.94  | T   | C    | 0.64 | 0.81 | 0.15 | 0.35 | 0   | 0      |                 |                   |                    |         |      |                            |
| c273849   | 1   | 1816259 | 0.87     | 0.94  | G   | C    | 0.67 | 0.82 | 0.15 | 0.35 | 0   | 0      |                 |                   |                    |         |      |                            |
| c273849   | 1   | 1816259 | 0.87     | 0.94  | G   | C    | 0.67 | 0.82 | 0.15 | 0.35 | 0   | 0      |                 |                   |                    |         |      |                            |
| c300700   | 1   | 1816290 | 0.87     | 0.94  | T   | G    | 0.67 | 0.82 | 0.15 | 0.35 | 0   | 0      |                 |                   |                    |         |      |                            |
| c284615   | 1   | 1816517 | 0.87     | 0.94  | C   | G    | 0.67 | 0.82 | 0.15 | 0.35 | 1   | 1      |                 |                   |                    |         |      |                            |
| c284382   | 1   | 1816542 | 0.87     | 0.94  | T   | G    | 0.67 | 0.82 | 0.15 | 0.35 | 0   | 0      |                 |                   |                    |         |      |                            |
| c284267   | 1   | 1816508 | 0.86     | 0.96  | C   | T    | 0.68 | 0.82 | 0.15 | 0.36 | 0   | 0      |                 |                   |                    |         |      |                            |
| c273849   | 1   | 1816096 | 0.87     | 0.94  | G   | C    | 0.68 | 0.83 | 0.15 | 0.35 | 0   | 0      |                 |                   |                    |         |      |                            |
| c273848   | 1   | 1816082 | 0.87     | 0.94  | T   | C    | 0.64 | 0.81 | 0.15 | 0.35 | 0   | 0      |                 |                   |                    |         |      |                            |
| c273849   | 1   | 1816259 | 0.87     | 0.94  | G   | C    | 0.67 | 0.82 | 0.15 | 0.35 | 0   | 0      |                 |                   |                    |         |      |                            |
| c273849   | 1   | 1816259 | 0.87     | 0.94  | G   | C    | 0.67 | 0.82 | 0.15 | 0.35 | 0   | 0      |                 |                   |                    |         |      |                            |
| c300700   | 1   | 1816290 | 0.87     | 0.94  | T   | G    | 0.67 | 0.82 | 0.15 | 0.35 | 0   | 0      |                 |                   |                    |         |      |                            |
| c284615   | 1   | 1816517 | 0.87     | 0.94  | C   | G    | 0.67 | 0.82 | 0.15 | 0.35 | 1   | 1      |                 |                   |                    |         |      |                            |
| c284382   | 1   | 1816542 | 0.87     | 0.94  | T   | G    | 0.67 | 0.82 | 0.15 | 0.35 | 0   | 0      |                 |                   |                    |         |      |                            |
| c284267   | 1   | 1816508 | 0.86     | 0.96  | C   | T    | 0.68 | 0.82 | 0.15 | 0.36 | 0   | 0      |                 |                   |                    |         |      |                            |
| c273849   | 1   | 1816096 | 0.87     | 0.94  | G   | C    | 0.68 | 0.83 | 0.15 | 0.35 | 0   | 0      |                 |                   |                    |         |      |                            |
| c273848   | 1   | 1816082 | 0.87     | 0.94  | T   | C    | 0.64 | 0.81 | 0.15 | 0.35 | 0   | 0      |                 |                   |                    |         |      |                            |
| c273849   | 1   | 1816259 | 0.87     | 0.94  | G   | C    | 0.67 | 0.82 | 0.15 | 0.35 | 0   | 0      |                 |                   |                    |         |      |                            |
| c273849   | 1   | 1816259 | 0.87     | 0.94  | G   | C    | 0.67 | 0.82 | 0.15 | 0.35 | 0   | 0      |                 |                   |                    |         |      |                            |
| c300700   | 1   | 1816290 | 0.87     | 0.94  | T   | G    | 0.67 | 0.82 | 0.15 | 0.35 | 0   | 0      |                 |                   |                    |         |      |                            |
| c284615   | 1   | 1816517 | 0.87     | 0.94  | C   | G    | 0.67 | 0.82 | 0.15 | 0.35 | 1   | 1      |                 |                   |                    |         |      |                            |
| c284382   | 1   | 1816542 | 0.87     | 0.94  | T   | G    | 0.67 | 0.82 | 0.15 | 0.35 | 0   | 0      |                 |                   |                    |         |      |                            |
| c284267   | 1   | 1816508 | 0.86     | 0.96  | C   | T    | 0.68 | 0.82 | 0.15 | 0.36 | 0   | 0      |                 |                   |                    |         |      |                            |
| c273849   | 1   | 1816096 | 0.87     | 0.94  | G   | C    | 0.68 | 0.83 | 0.15 | 0.35 | 0   | 0      |                 |                   |                    |         |      |                            |
| c273848   | 1   | 1816082 | 0.87     | 0.94  | T   | C    | 0.64 | 0.81 | 0.15 | 0.35 | 0   | 0      |                 |                   |                    |         |      |                            |
| c273849   | 1   | 1816259 | 0.87     | 0.94  | G   | C    | 0.67 | 0.82 | 0.15 | 0.35 | 0   | 0      |                 |                   |                    |         |      |                            |
| c273849   | 1   | 1816259 | 0.87     | 0.94  | G   | C    | 0.67 | 0.82 | 0.15 | 0.35 | 0   | 0      |                 |                   |                    |         |      |                            |
| c300700   | 1   | 1816290 | 0.87     | 0.94  | T   | G    | 0.67 | 0.82 | 0.15 | 0.35 | 0   | 0      |                 |                   |                    |         |      |                            |
| c284615   | 1   | 1816517 | 0.87     | 0.94  | C   | G    | 0.67 | 0.82 | 0.15 | 0.35 | 1   | 1      |                 |                   |                    |         |      |                            |
| c284382   | 1   | 1816542 | 0.87     | 0.94  | T   | G    | 0.67 | 0.82 | 0.15 | 0.35 | 0   | 0      |                 |                   |                    |         |      |                            |
| c284267   | 1   | 1816508 | 0.86     | 0.96  | C   | T    | 0.68 | 0.82 | 0.15 | 0.36 | 0   | 0      |                 |                   |                    |         |      |                            |
| c273849   | 1   | 1816096 | 0.87     | 0.94  | G   | C    | 0.68 | 0.83 | 0.15 | 0.35 | 0   | 0      |                 |                   |                    |         |      |                            |
| c273848   | 1   | 1816082 | 0.87     | 0.94  | T   | C    | 0.64 | 0.81 | 0.15 | 0.35 | 0   | 0      |                 |                   |                    |         |      |                            |
| c273849   | 1   | 1816259 | 0.87     | 0.94  | G   | C    | 0.67 | 0.82 | 0.15 | 0.35 | 0   | 0      |                 |                   |                    |         |      |                            |
| c273849   | 1   | 1816259 | 0.87     | 0.94  | G   | C    | 0.67 | 0.82 | 0.15 | 0.35 | 0   | 0      |                 |                   |                    |         |      |                            |
| c300700   | 1   | 1816290 | 0.87     | 0.94  | T   | G    | 0.67 | 0.82 | 0.15 | 0.35 | 0   | 0      |                 |                   |                    |         |      |                            |
| c284615   | 1   | 1816517 | 0.87     | 0.94  | C   | G    | 0.67 | 0.82 | 0.15 | 0.35 | 1   | 1      |                 |                   |                    |         |      |                            |
| c284382   | 1   | 1816542 | 0.87     | 0.94  | T   | G    | 0.67 | 0.82 | 0.15 | 0.35 | 0   | 0      |                 |                   |                    |         |      |                            |
| c284267   | 1   | 1816508 | 0.86     | 0.96  | C   | T    | 0.68 | 0.82 | 0.15 | 0.36 | 0   | 0      |                 |                   |                    |         |      |                            |
| c273849   | 1   | 1816096 | 0.87     | 0.94  | G   | C    | 0.68 | 0.83 | 0.15 | 0.35 | 0   | 0      |                 |                   |                    |         |      |                            |
| c273848   | 1   | 1816082 | 0.87     | 0.94  | T   | C    | 0.64 | 0.81 | 0.15 | 0.35 | 0   | 0      |                 |                   |                    |         |      |                            |
| c273849   | 1   | 1816259 | 0.87     | 0.94  | G   | C    | 0.67 | 0.82 | 0.15 | 0.35 | 0   | 0      |                 |                   |                    |         |      |                            |
| c273849   | 1   | 1816259 | 0.87     | 0.94  | G   | C    | 0.67 | 0.82 | 0.15 | 0.35 | 0   | 0      |                 |                   |                    |         |      |                            |
| c300700   | 1   | 1816290 | 0.87     | 0.94  | T   | G    | 0.67 | 0.82 | 0.15 | 0.35 | 0   | 0      |                 |                   |                    |         |      |                            |
| c284615   | 1   | 1816517 | 0.87     | 0.94  | C   | G    | 0.67 | 0.82 | 0.15 | 0.35 | 1   | 1      |                 |                   |                    |         |      |                            |
| c284382   | 1   | 1816542 | 0.87     | 0.94  | T   | G    | 0.67 | 0.82 | 0.15 | 0.35 | 0   | 0      |                 |                   |                    |         |      |                            |
| c284267   | 1   | 1816508 | 0.86     | 0.96  | C   | T    | 0.68 | 0.82 | 0.15 | 0.36 | 0   | 0      |                 |                   |                    |         |      |                            |
| c273849   | 1   | 1816096 | 0.87     | 0.94  | G   | C    | 0.68 | 0.83 | 0.15 | 0.35 | 0   | 0      |                 |                   |                    |         |      |                            |
| c273848   | 1   | 1816082 | 0.87     | 0.94  | T   | C    | 0.64 | 0.81 | 0.15 | 0.35 | 0   | 0      |                 |                   |                    |         |      |                            |
| c273849   | 1   | 1816259 | 0.87     | 0.94  | G   | C    | 0.67 | 0.82 | 0.15 | 0.35 | 0   | 0      |                 |                   |                    |         |      |                            |
| c273849   | 1   | 1816259 | 0.87     | 0.94  | G   | C    | 0.67 | 0.82 | 0.15 | 0.35 | 0   | 0      |                 |                   |                    |         |      |                            |
| c300700   | 1   | 1816290 | 0.87     | 0.94  | T   | G    | 0.67 | 0.82 | 0.15 | 0.35 | 0   | 0      |                 |                   |                    |         |      |                            |
| c284615   | 1   | 1816517 | 0.87     | 0.94  | C   | G    | 0.67 | 0.82 | 0.15 | 0.35 | 1   | 1      |                 |                   |                    |         |      |                            |
| c284382   | 1   | 1816542 | 0.87     | 0.94  | T   | G    |      |      |      |      |     |        |                 |                   |                    |         |      |                            |

[illegible]
